# Supplementary material for: 1H chemical shift differences of Prelog–Djerassi lactone derivatives: DFT and NMR conformational studies
Source: Royal Society of Chemistry journal article supplement (doi:10.1039/c4ob02446j), 2014-12-09
Supplement: c4ob02446j1.pdf [file c4ob02446j1.pdf]

## **$^1\text{H}$ chemical shift differences of Prelog-Djerassi lactone derivatives: A DFT and NMR conformational studies.**

Túlio J. Aímola,<sup>†</sup> Dimas J. P. Lima,<sup>‡,§</sup> Luiz C. Dias,<sup>§</sup> Cláudio F. Tormena,<sup>§</sup> Marco A. B. Ferreira.\*<sup>†</sup>

<sup>†</sup> Laboratório de Química Bio-orgânica e Laboratório de Cristalografia, Estereodinâmica e Modelagem Molecular, Universidade Federal de São Carlos, C.P. 676, São Carlos, Brazil.

<sup>‡</sup> Universidade Federal de Alagoas, CEP: 57072900 - Maceió, Brazil.

<sup>§</sup> Chemistry Institute, State University of Campinas, Campinas 13084-971, Brazil.

### **SUPPORTING INFORMATION**

|                               |                                     |                              |                                                    |                               |             |
|-------------------------------|-------------------------------------|------------------------------|----------------------------------------------------|-------------------------------|-------------|
| <b>Acquisition Time (sec)</b> | 3.9999                              | <b>Comment</b>               | Dimas "DL 2.80 - 17 a 23" CDCl3/Tri-Res dez16djpH1 | <b>Date</b>                   | Dec 16 2009 |
| <b>File Name</b>              | \\vboxsrv\XP-folder\Boi1\dez16djpH1 | <b>Frequency (MHz)</b>       | 499.89                                             | <b>Nucleus</b>                | 1H          |
| <b>Number of Transients</b>   | 16                                  | <b>Original Points Count</b> | 31999                                              | <b>Points Count</b>           | 32768       |
| <b>Solvent</b>                | CHLOROFORM-D                        | <b>Sweep Width (Hz)</b>      | 8000.00                                            | <b>Pulse Sequence</b>         | s2pul       |
|                               |                                     |                              |                                                    | <b>Temperature (degree C)</b> | 25.000      |

Chloroform-d

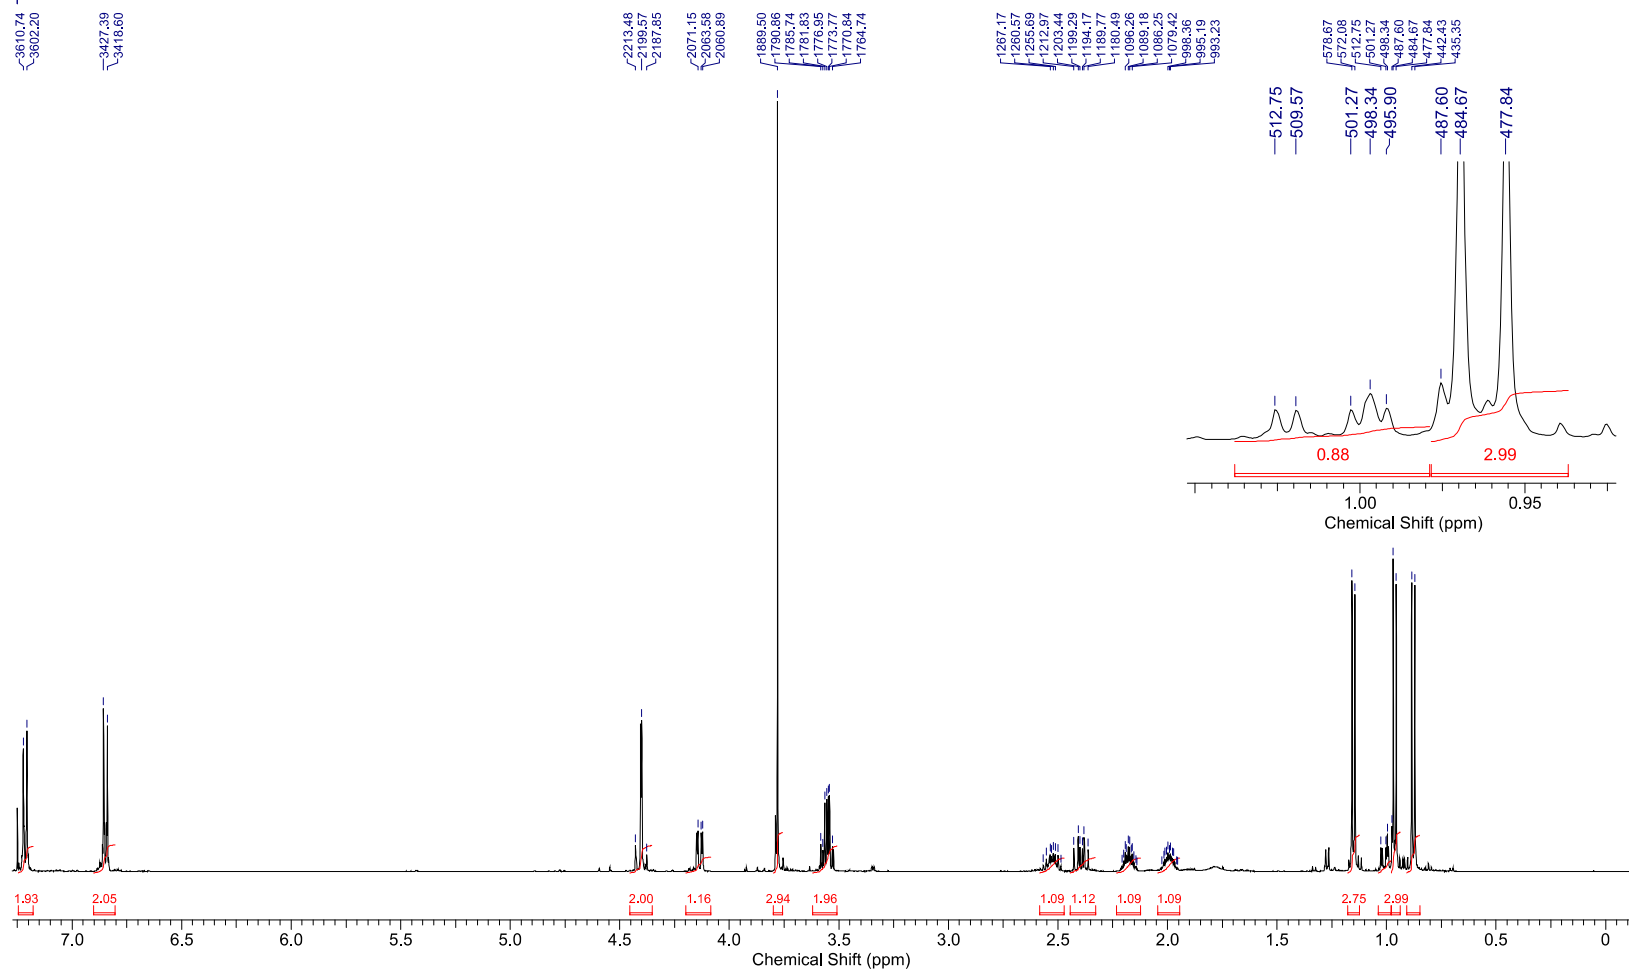

Figure S1. 500 MHz <sup>1</sup>H NMR spectrum for compound 2 in CDCl<sub>3</sub>.

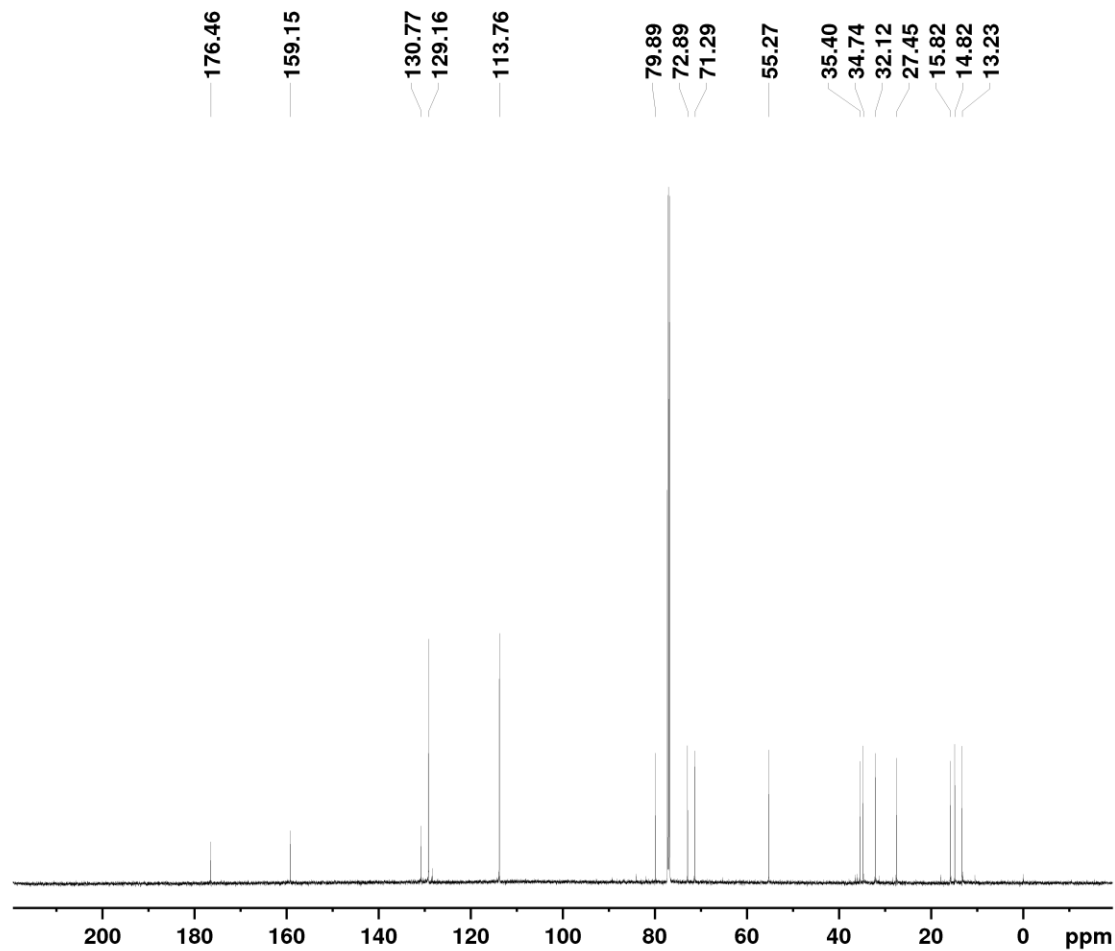

```

Current Data Parameters
NAME          compound 2
EXPNO         5
PROCNO        1

F2 - Acquisition Parameters
Date_         20140701
Time          0.03
INSTRUM       spect
PROBHD        5 mm PATXI 1H/
PULPROG       zgpg30
TD            32768
SOLVENT       CDC13
NS            2048
DS            0
SWH           36057.691 Hz
FIDRES        1.100393 Hz
AQ            0.4543829 sec
RG            203
DW            13.867 usec
DE            6.50 usec
TE            -0.2 K
D1            2.00000000 sec
D11           0.03000000 sec
TD0           1

===== CHANNEL f1 =====
SFO1          150.9279571 MHz
NUC1           13C
P1            17.00 usec
PLW1          95.00000000 W

===== CHANNEL f2 =====
SFO2          600.1724007 MHz
NUC2           1H
CPDPRG[2]     waltz16
PCPD2         70.00 usec
PLW2          7.00000000 W
PLW12         0.08035700 W
PLW13         0.03937500 W

F2 - Processing parameters
SI            32768
SF            150.9128670 MHz
WDW           EM
SSB           0
LB            1.00 Hz
GB            0
PC            1.40

```

Figure S2. 150 MHz  $^{13}\text{C}$  NMR spectrum for compound in  $\text{CDCl}_3$ .

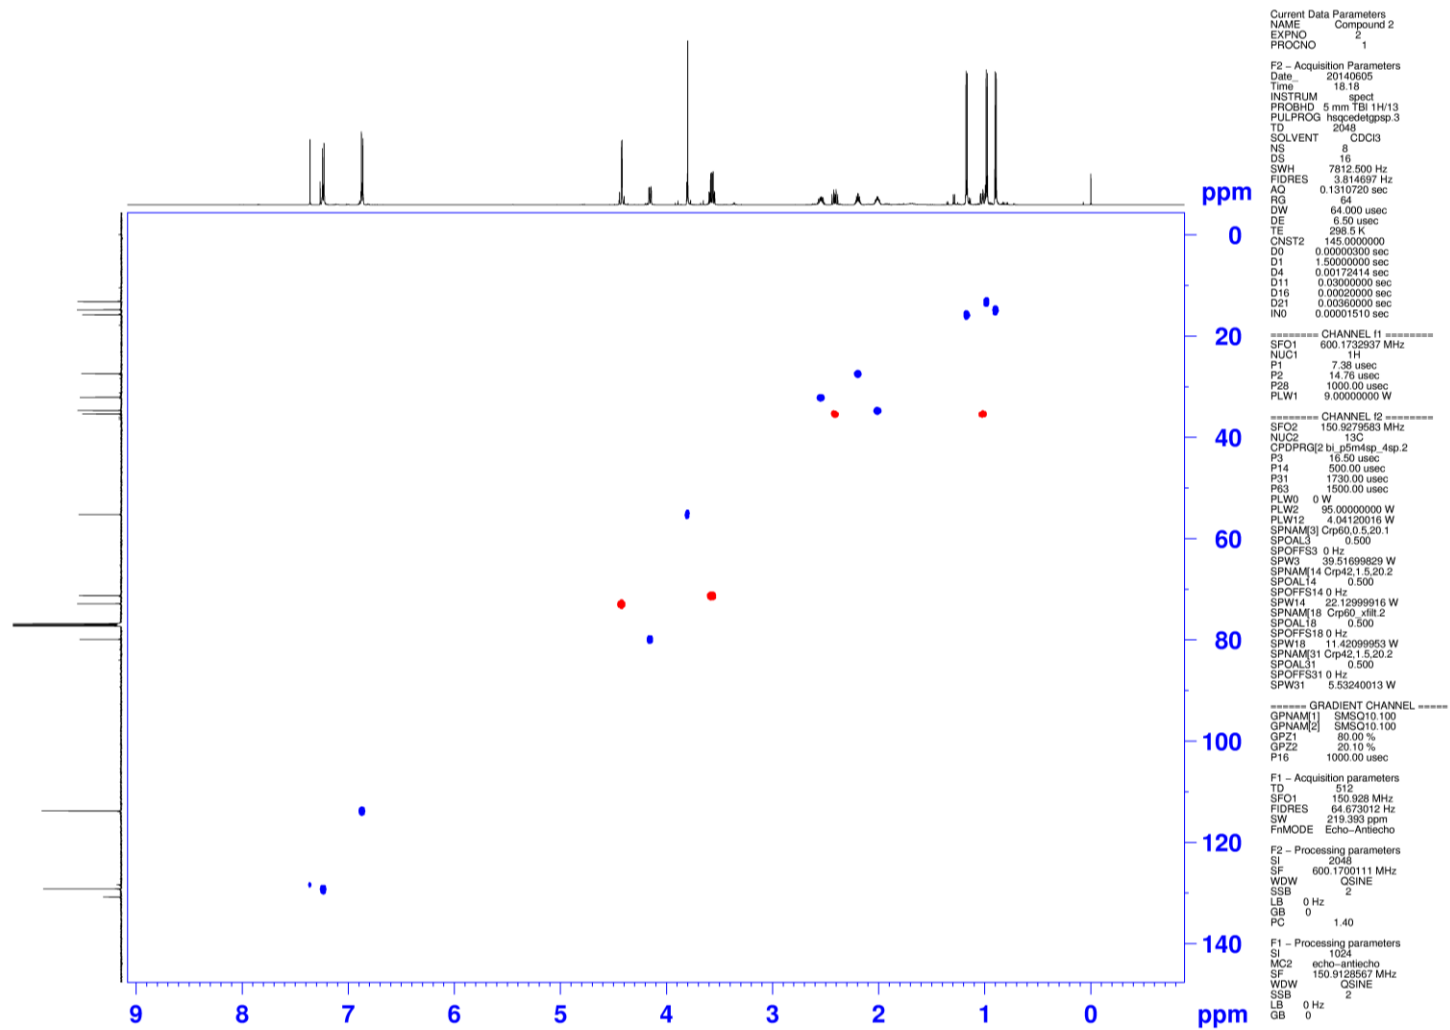

Figure S4. HSQC with multiplicity editing contour plot for compound 2 at 600 MHz in CDCl<sub>3</sub>

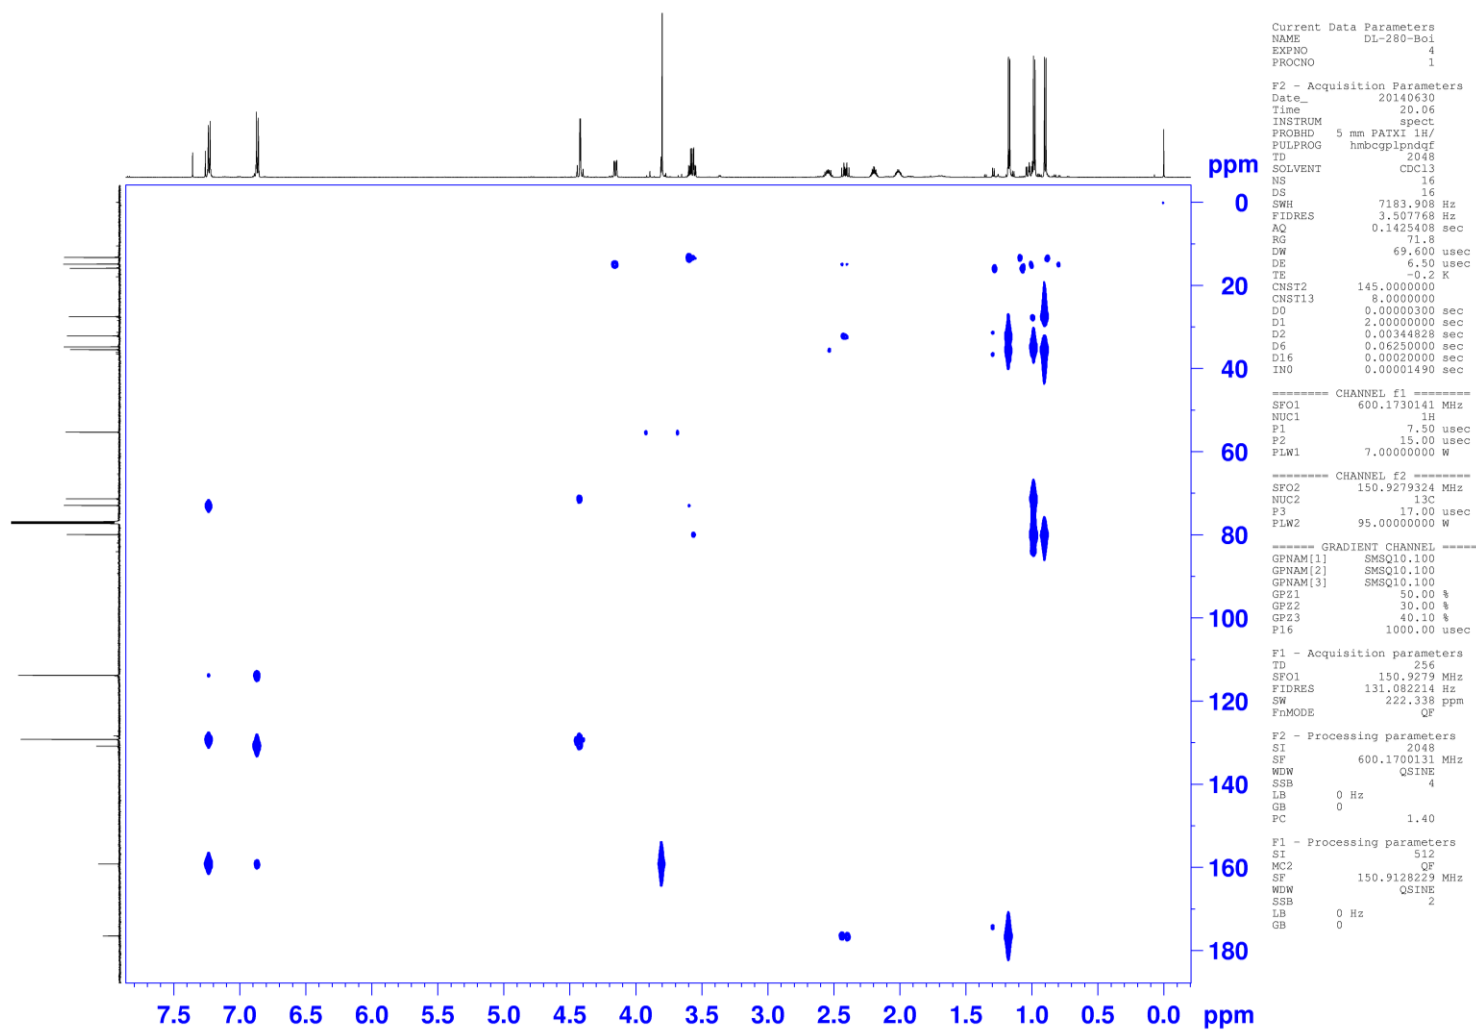

Figure S5. HMBC contour plot for compound 2 at 600 MHz in CDCl<sub>3</sub>.
