# Supplementary material for: 1H chemical shift differences of Prelog–Djerassi lactone derivatives: DFT and NMR conformational studies
Source: Royal Society of Chemistry journal article supplement (doi:10.1039/c4ob02446j), 2014-12-09
Supplement: c4ob02446j2.pdf [file c4ob02446j2.pdf]

## <sup>1</sup>H chemical shift differences of Prelog-Djerassi lactone derivatives: A DFT and NMR conformational studies.

Túlio J. Aímola,<sup>†</sup> Dimas J. P. Lima,<sup>‡,§</sup> Luiz C. Dias,<sup>§</sup> Cláudio F. Tormena,<sup>§</sup> Marco A. B. Ferreira.<sup>\*,†</sup>

<sup>†</sup> Laboratório de Química Bio-orgânica e Laboratório de Cristalografia, Estereodinâmica e Modelagem Molecular, Universidade Federal de São Carlos, C.P. 676, São Carlos, Brazil.

<sup>‡</sup> Universidade Federal de Alagoas, CEP: 57072900 - Maceió, Brazil.

<sup>§</sup> Chemistry Institute, State University of Campinas, Campinas 13084-971, Brazil.

### SUPPORTING INFORMATION

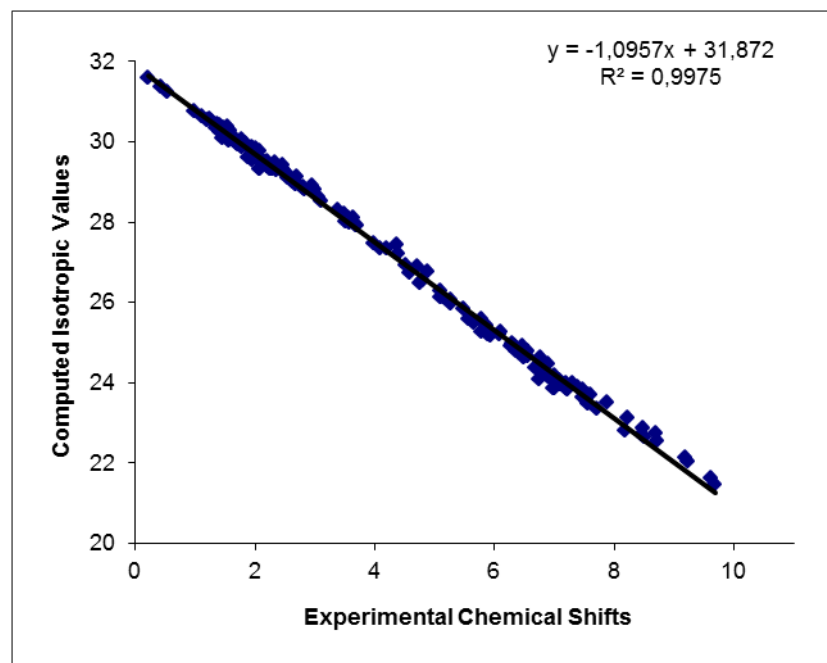

**Figure S1.** Scaling factor generated and used in this work at *mPW1PW91/6-311+G(2d,p)[SMD=CHCl<sub>3</sub>]/M062X/6-31+G(d,p)[IEF-PCM-CHCl<sub>3</sub>]* level of theory.

**Table S1.** Geometries of clustered-superposed conformers and reoptimized low-energy conformers at M06-2X/6-31+G(d,p) [IEF-PCM – CHCl<sub>3</sub>] of lactone **2'**.

| Clusters                                                                                                 | Reoptimized low-energy conformer                                                    | Clusters                                                                             | Reoptimized Low-energy conformer                                                      |
|----------------------------------------------------------------------------------------------------------|-------------------------------------------------------------------------------------|--------------------------------------------------------------------------------------|---------------------------------------------------------------------------------------|
| 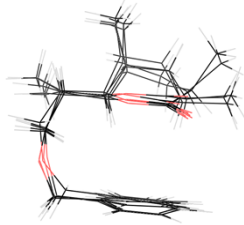<br><i>Cluster 1</i>    |    |    |    |
| <br><i>Cluster 3</i>    |    |    |    |
| <br><i>Cluster 5</i>   |   |   |   |
| <br><i>Cluster 7</i>  |  |  |  |
| <br><i>Cluster 9</i>  |  |  |  |
| <br><i>Cluster 11</i> |  |  |  |

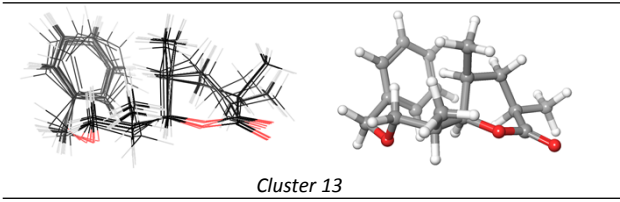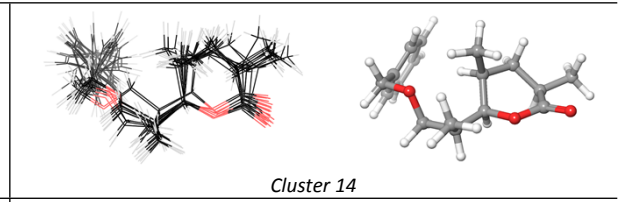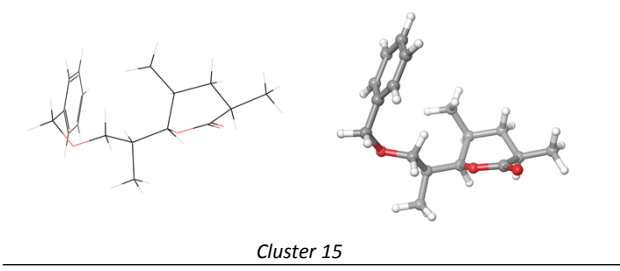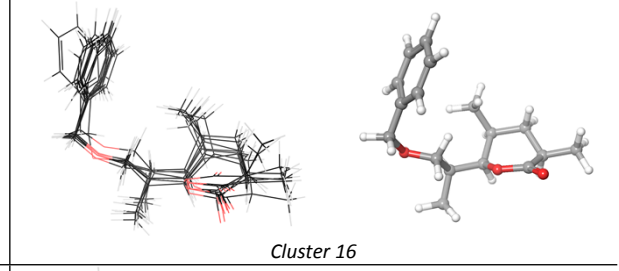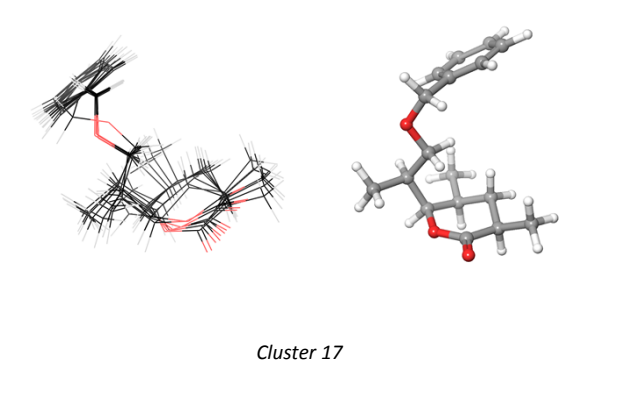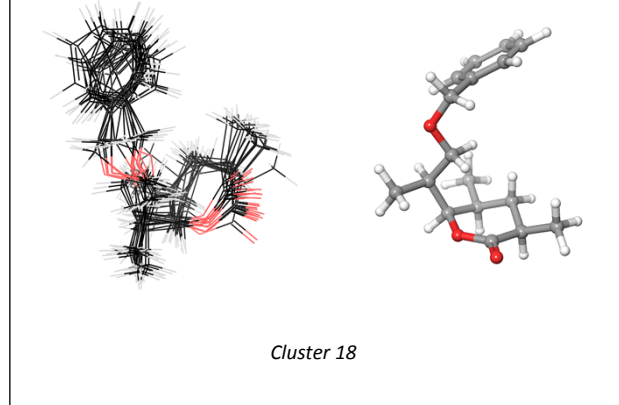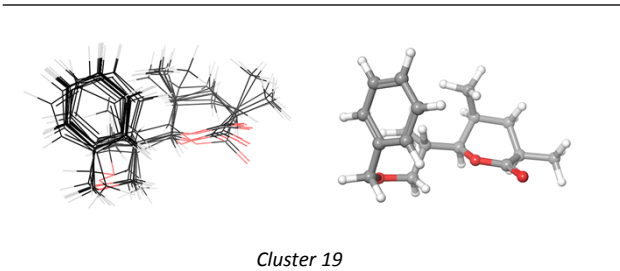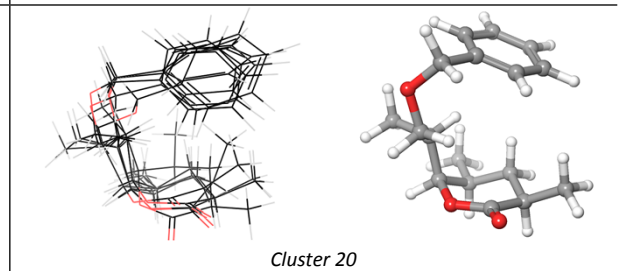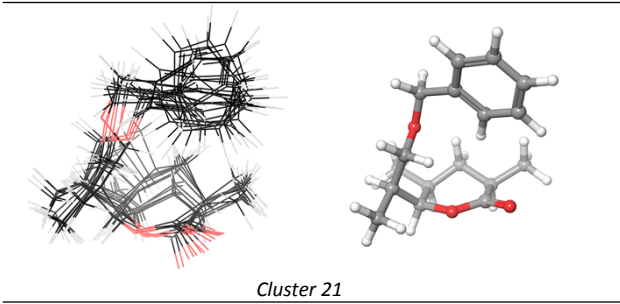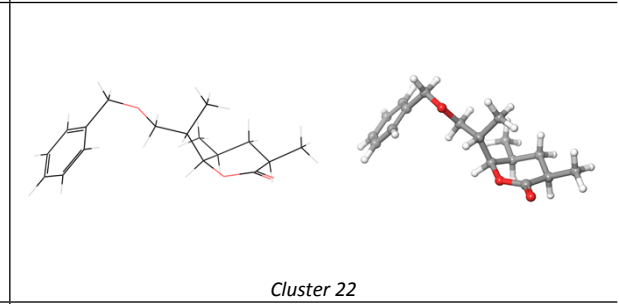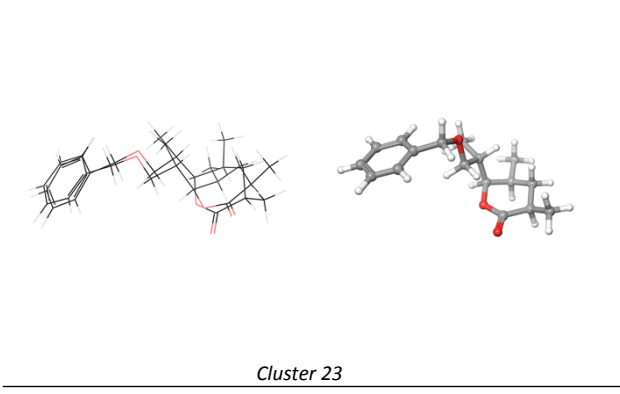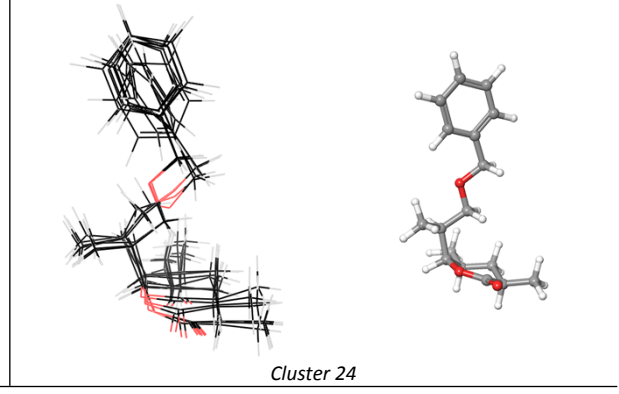

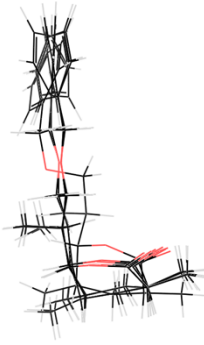

Cluster 25

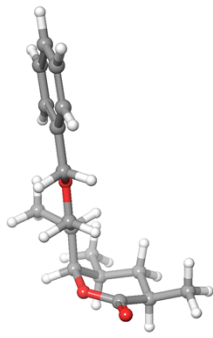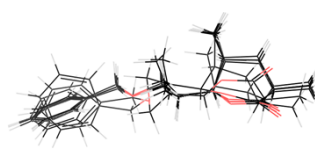

Cluster 26

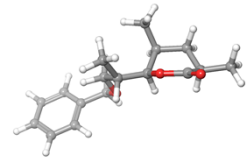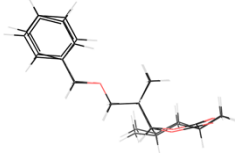

Cluster 27

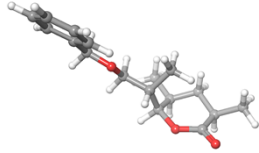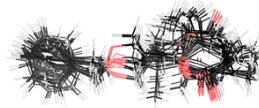

Cluster 28

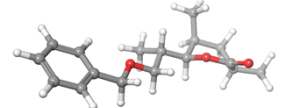

**Table S2.** Electronic Energies ( $E$ ), and Gibbs Free Energies ( $G$ ) of low-energy conformers at M06-2X/6-31+G(d,p) [IEF-PCM – CHCl<sub>3</sub>] of lactone **2'**. The highlighted entries correspond to structures considered in the calculation of NMR properties and Boltzmann distribution.

|               | $E$ (au)     | $\Delta G$ (au) | $\Delta\Delta G$ (kcal mol <sup>-1</sup> ) |
|---------------|--------------|-----------------|--------------------------------------------|
| <b>2'-c1</b>  | -887.6188789 | -887.279576     | 0.76                                       |
| <b>2'-c2</b>  | -887.6092029 | -887.273528     | 4.56                                       |
| <b>2'-c3</b>  | -887.6188760 | -887.280044     | 0.47                                       |
| <b>2'-c4</b>  | -887.6103997 | -887.272343     | 5.30                                       |
| <b>2'-c5</b>  | -887.6133990 | -887.275153     | 3.54                                       |
| <b>2'-c6</b>  | -887.6142475 | -887.279493     | 0.82                                       |
| <b>2'-c7</b>  | -887.6107751 | -887.275482     | 3.33                                       |
| <b>2'-c8</b>  | -887.6152124 | -887.280596     | 0.12                                       |
| <b>2'-c9</b>  | -887.6164266 | -887.280795     | 0.00                                       |
| <b>2'-c10</b> | -887.6080388 | -887.272077     | 5.47                                       |
| <b>2'-c11</b> | -887.6099959 | -887.274118     | 4.19                                       |
| <b>2'-c12</b> | -887.6080291 | -887.270454     | 6.49                                       |
| <b>2'-c13</b> | -887.6141106 | -887.274772     | 3.78                                       |
| <b>2'-c14</b> | -887.6106080 | -887.273865     | 4.35                                       |
| <b>2'-c15</b> | -887.6116358 | -887.275056     | 3.60                                       |
| <b>2'-c16</b> | -887.6116383 | -887.274802     | 3.76                                       |
| <b>2'-c17</b> | -887.6103408 | -887.275525     | 3.31                                       |
| <b>2'-c18</b> | -887.6103325 | -887.275028     | 3.62                                       |
| <b>2'-c19</b> | -887.6149014 | -887.277822     | 1.87                                       |
| <b>2'-c20</b> | -887.6112686 | -887.273049     | 4.86                                       |
| <b>2'-c21</b> | -887.6100508 | -887.271307     | 5.95                                       |
| <b>2'-c22</b> | -887.6074805 | -887.27223      | 5.37                                       |
| <b>2'-c23</b> | -887.6099920 | -887.274424     | 4.00                                       |
| <b>2'-c24</b> | -887.6088462 | -887.273472     | 4.60                                       |
| <b>2'-c25</b> | -887.6088933 | -887.274033     | 4.24                                       |
| <b>2'-c26</b> | -887.6110858 | -887.276328     | 2.80                                       |
| <b>2'-c27</b> | -887.6063731 | -887.271221     | 6.01                                       |
| <b>2'-c28</b> | -887.6137569 | -887.279765     | 0.65                                       |

**Table S3.** Electronic Energies ( $E$ ), and Gibbs Free Energies ( $G$ ) of low-energy conformers of lactone **3** at M06-2X/6-31+G(d,p) [IEF-PCM – CHCl<sub>3</sub>]. The highlighted entries correspond to structures considered in the calculation of NMR properties and Boltzmann distribution.

|            | $E$ (au)       | $\Delta G$ (au) | $\Delta\Delta G$ (kcal mol <sup>-1</sup> ) |
|------------|----------------|-----------------|--------------------------------------------|
| <b>3-a</b> | -542.161659957 | -541.929605     | 3.93                                       |
| <b>3-b</b> | -542.158512291 | -541.926208     | 6.06                                       |
| <b>3-c</b> | -542.162971594 | -541.931344     | 2.84                                       |
| <b>3-d</b> | -542.160166705 | -541.928531     | 4.60                                       |
| <b>3-e</b> | -542.167435634 | -541.935864     | 0.00                                       |
| <b>3-f</b> | -542.163469771 | -541.931513     | 2.73                                       |

**Table S4.** Geometries of low-energy conformers at M06-2X/6-31+G(d,p) [IEF-PCM – CHCl<sub>3</sub>] of lactone **3'**.

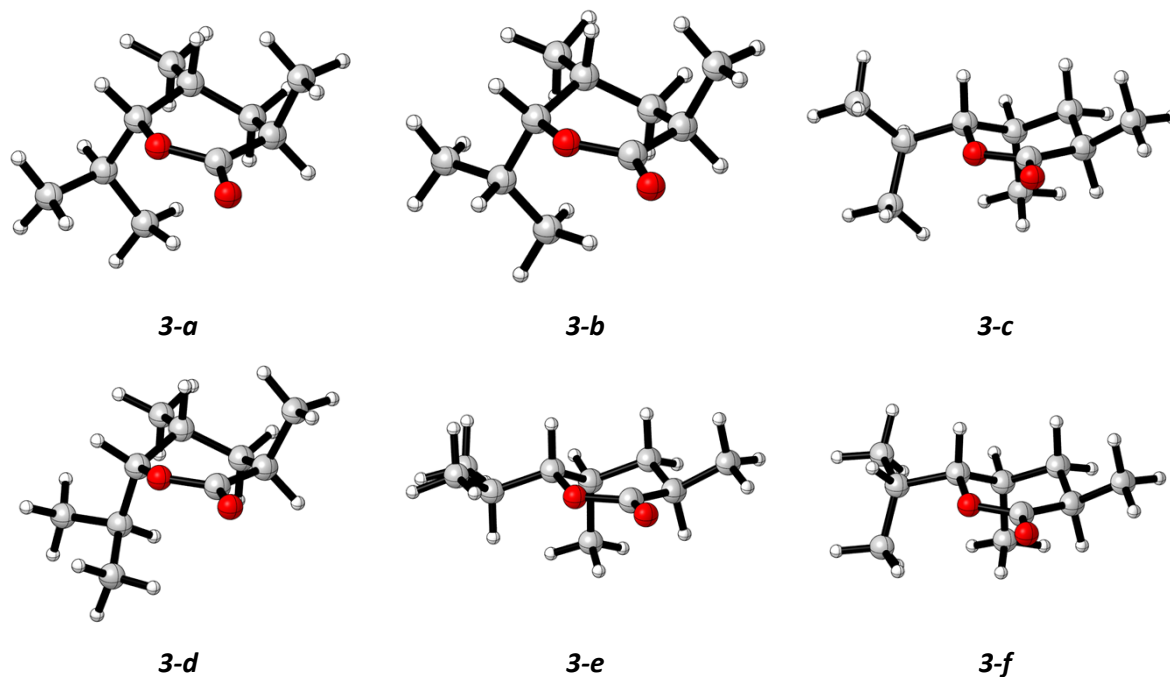

**Table S5.** Electronic Energies ( $E$ ), and Gibbs Free Energies ( $G$ ) of low-energy conformers of lactone **4** at M06-2X/6-31+G(d,p) [IEF-PCM – CHCl<sub>3</sub>]. The highlighted entries correspond to structures considered in the calculation of NMR properties and Boltzmann distribution.

|            | $E$ (au)       | $\Delta G$ (au) | $\Delta\Delta G$ (kcal mol <sup>-1</sup> ) |
|------------|----------------|-----------------|--------------------------------------------|
| <b>4-a</b> | -542.166001388 | -541.9347860    | 0.78                                       |
| <b>4-b</b> | -542.165598461 | -541.9335850    | 1.54                                       |
| <b>4-c</b> | -542.163255177 | -541.9311630    | 3.06                                       |
| <b>4-d</b> | -542.167007824 | -541.9360330    | 0.00                                       |
| <b>4-e</b> | -542.162965562 | -541.9318120    | 2.65                                       |
| <b>4-f</b> | -542.166957213 | -541.9357130    | 0.20                                       |
| <b>4-g</b> | -542.163698472 | -541.9322580    | 2,37                                       |

**Table S6.** Geometries of low-energy conformers at M06-2X/6-31+G(d,p) [IEF-PCM – CHCl<sub>3</sub>] of lactone **4**.

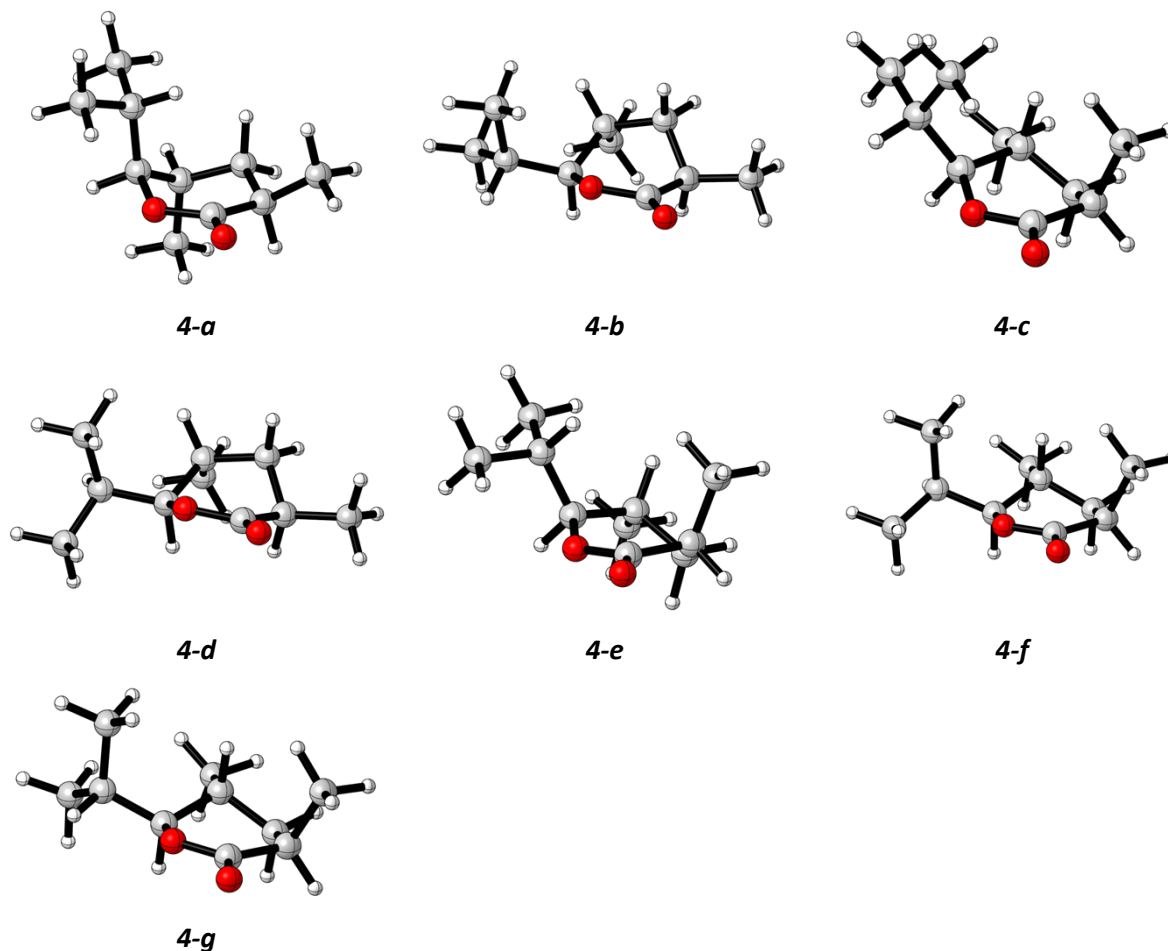

**Table S7.** Electronic Energies ( $E$ ), and Gibbs Free Energies ( $G$ ) of low-energy conformers of lactone **5** at M06-2X/6-31+G(d,p) [IEF-PCM – CHCl<sub>3</sub>]. The highlighted entries correspond to structures considered in the calculation of NMR properties and Boltzmann distribution.

|            | $E$ (au)       | $\Delta G$ (au) | $\Delta\Delta G$ (kcal mol <sup>-1</sup> ) |
|------------|----------------|-----------------|--------------------------------------------|
| <b>5-a</b> | -542.165111039 | -541.934328     | 2.12                                       |
| <b>5-b</b> | -542.168231279 | -541.937699     | 0.00                                       |
| <b>5-c</b> | -542.165455587 | -541.933345     | 2.73                                       |
| <b>5-d</b> | -542.164560379 | -541.932833     | 3.05                                       |
| <b>5-e</b> | -542.159527296 | -541.927868     | 6.17                                       |
| <b>5-f</b> | -542.159870552 | -541.927371     | 6.48                                       |
| <b>5-g</b> | -542.164556618 | -541.932514     | 3.25                                       |
| <b>5-h</b> | -542.162398383 | -541.930656     | 4.42                                       |
| <b>5-i</b> | -542.161005843 | -541.928502     | 5.77                                       |
| <b>5-j</b> | -542.165102320 | -541.934575     | 1.96                                       |
| <b>5-k</b> | -542.164969875 | -541.934009     | 2.32                                       |

**Table S8.** Geometries of low-energy conformers at M06-2X/6-31+G(d,p) [IEF-PCM – CHCl<sub>3</sub>] of lactone 5.

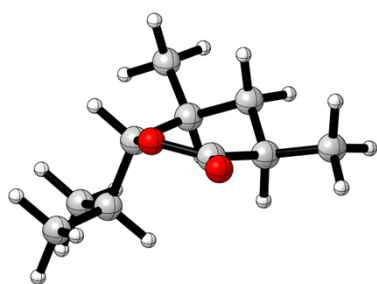

**5-a**

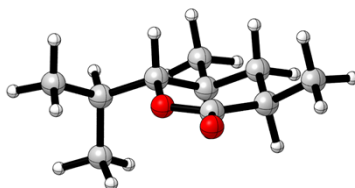

**5-b**

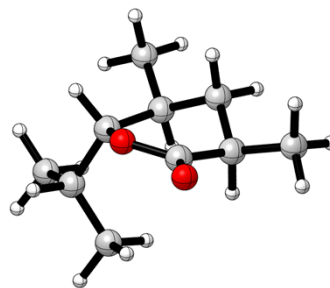

**5-c**

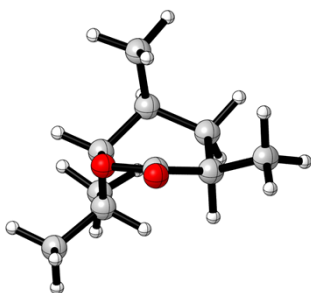

**5-d**

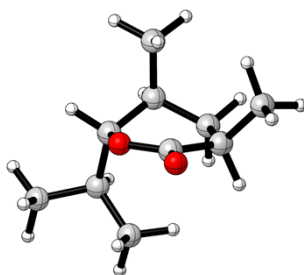

**5-e**

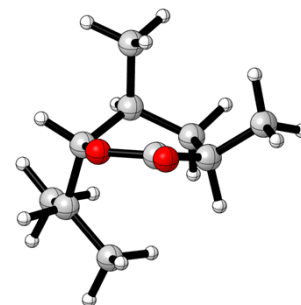

**5-f**

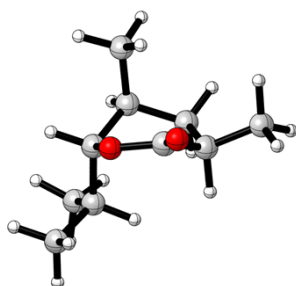

**5-g**

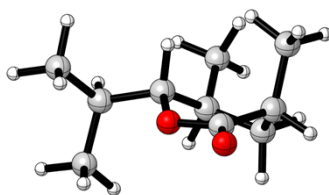

**5-h**

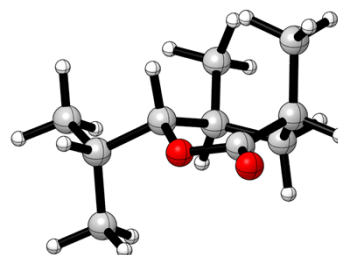

**5-i**

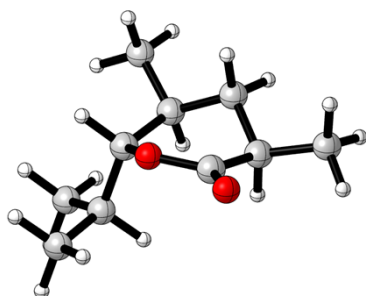

**5-j**

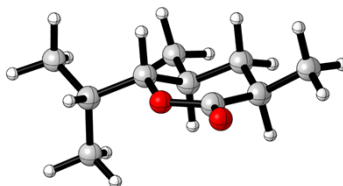

**5-k**



**Table S9.** Electronic Energies ( $E$ ), and Gibbs Free Energies ( $G$ ) of low-energy conformers of lactone **6** at M06-2X/6-31+G(d,p) [IEF-PCM – CHCl<sub>3</sub>]. The highlighted entries correspond to structures considered in the calculation of NMR properties and Boltzmann distribution.

|            | $E$ (au)       | $\Delta G$ (au) | $\Delta\Delta G$ (kcal mol <sup>-1</sup> ) |
|------------|----------------|-----------------|--------------------------------------------|
| <b>6-a</b> | -542.162896371 | -541.9308840    | 3.20                                       |
| <b>6-b</b> | -542.162602703 | -541.9305000    | 3.44                                       |
| <b>6-c</b> | -542.162600647 | -541.9304660    | 3.46                                       |
| <b>6-d</b> | -542.161745495 | -541.9305930    | 3.38                                       |
| <b>6-e</b> | -542.163541698 | -541.9317730    | 2.64                                       |
| <b>6-f</b> | -542.160308237 | -541.9280030    | 5.01                                       |
| <b>6-g</b> | -542.167572910 | -541.9359860    | 0.00                                       |
| <b>6-h</b> | -542.162897487 | -541.9310290    | 3.11                                       |
| <b>6-i</b> | -542.160047400 | -541.9296100    | 4.00                                       |

**Table S10.** Geometries of low-energy conformers at M06-2X/6-31+G(d,p) [IEF-PCM – CHCl<sub>3</sub>] of lactone **6**.

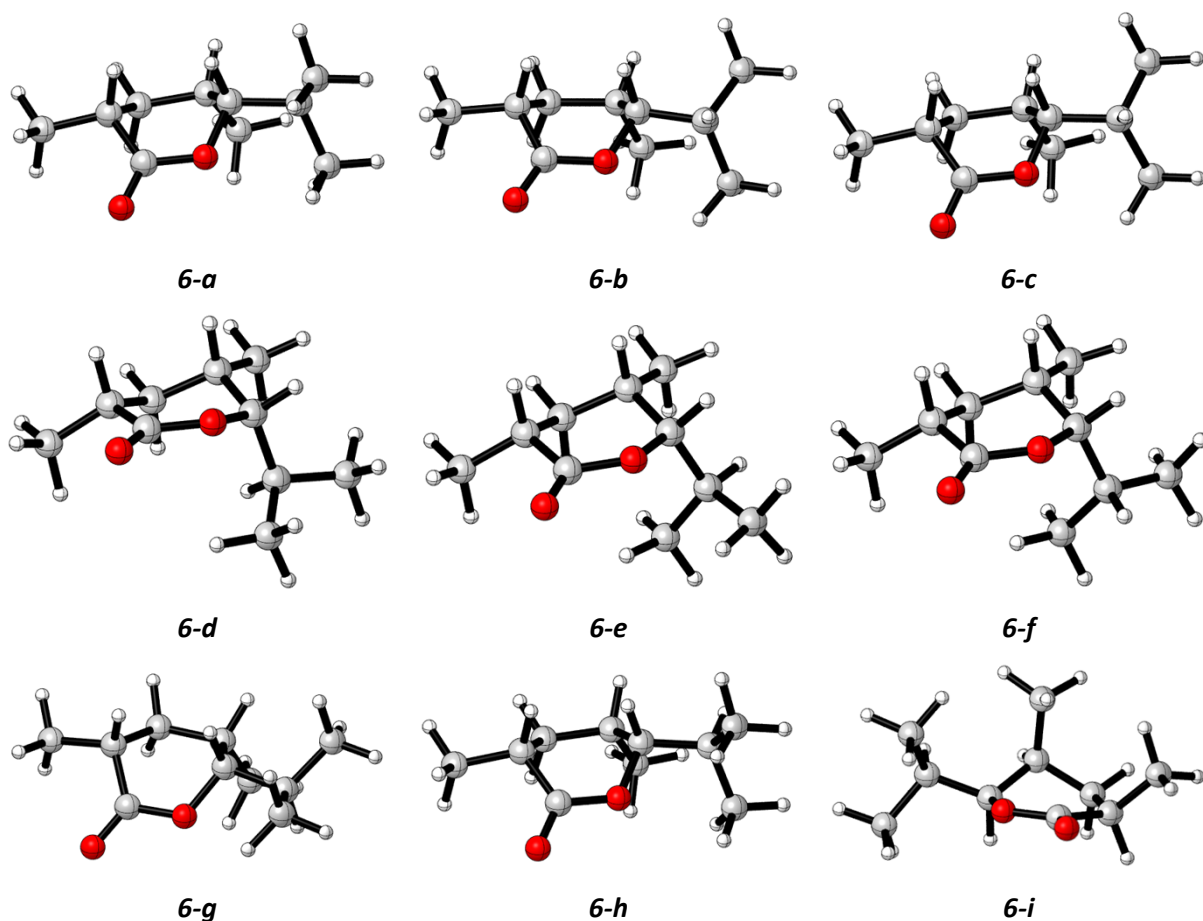

The Tables S11, S12, S13, and S14 follow the numeration depicted in the figure below.

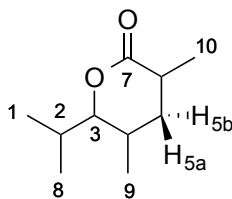

**Table S11.** Calculated  $^1\text{H}$  NMR chemical shifts (ppm) of selected low-energy conformer of lactone **3** at mPW1PW91/6-311+G(2d,p)[SMD -  $\text{CHCl}_3$ ]/M062X/6-31+G(d,p) [IEF-PCM- $\text{CHCl}_3$ ].

| <b>3-e</b> |      |
|------------|------|
| <b>1</b>   | 1.04 |
| <b>2</b>   | 1.70 |
| <b>3</b>   | 3.59 |
| <b>4</b>   | 2.05 |
| <b>5a</b>  | 1.80 |
| <b>5b</b>  | 1.62 |
| <b>6</b>   | 2.52 |
| <b>8</b>   | 0.88 |
| <b>9</b>   | 0.99 |
| <b>10</b>  | 1.19 |

**Table S12.** Calculated  $^1\text{H}$  NMR chemical shifts (ppm) of selected low-energy conformers of lactone **4** at mPW1PW91/6-311+G(2d,p)[SMD -  $\text{CHCl}_3$ ]/M062X/6-31+G(d,p) [IEF-PCM- $\text{CHCl}_3$ ].

|           | <b>4-a</b> | <b>4-b</b> | <b>4-d</b> | <b>4-f</b> | <b>av</b> |
|-----------|------------|------------|------------|------------|-----------|
| <b>1</b>  | 1.08       | 0.94       | 1.09       | 1.05       | 1.04      |
| <b>2</b>  | 1.67       | 2.08       | 1.76       | 1.85       | 1.84      |
| <b>3</b>  | 3.48       | 3.71       | 3.59       | 3.60       | 3.60      |
| <b>4</b>  | 2.05       | 2.08       | 2.05       | 1.93       | 2.03      |
| <b>5a</b> | 1.58       | 1.45       | 1.48       | 1.70       | 1.55      |
| <b>5b</b> | 1.75       | 1.54       | 1.58       | 1.49       | 1.59      |
| <b>6</b>  | 2.58       | 2.44       | 2.46       | 2.57       | 2.51      |
| <b>8</b>  | 0.84       | 1.04       | 0.95       | 0.88       | 0.91      |
| <b>9</b>  | 1.15       | 1.00       | 0.94       | 0.91       | 1.00      |
| <b>10</b> | 1.19       | 1.08       | 1.05       | 1.27       | 1.15      |

**Table S13.** Calculated  $^1\text{H}$  NMR chemical shifts (ppm) of selected low-energy conformers of lactone **5** at mPW1PW91/6-311+G(2d,p)[SMD –  $\text{CHCl}_3$ ]/M062X/6-31+G(d,p) [IEF-PCM- $\text{CHCl}_3$ ].

|           | <i>5-a</i> | <i>5-b</i> | <i>5-j</i> | <i>5-k</i> | <i>av</i> |
|-----------|------------|------------|------------|------------|-----------|
| <b>1</b>  | 1.04       | 1.05       | 1.04       | 0.99       | 1.00      |
| <b>2</b>  | 1.61       | 1.89       | 1.64       | 1.91       | 1.76      |
| <b>3</b>  | 3.32       | 3.65       | 3.31       | 3.67       | 3.48      |
| <b>4</b>  | 1.94       | 1.87       | 1.94       | 1.90       | 1.91      |
| <b>5a</b> | 1.71       | 1.78       | 1.70       | 1.69       | 1.72      |
| <b>5b</b> | 1.30       | 1.32       | 1.34       | 1.37       | 1.33      |
| <b>6</b>  | 2.23       | 2.46       | 2.25       | 2.41       | 2.34      |
| <b>8</b>  | 0.95       | 0.87       | 0.96       | 1.07       | 0.96      |
| <b>9</b>  | 1.05       | 0.91       | 1.06       | 0.99       | 1.01      |
| <b>10</b> | 1.12       | 1.21       | 1.12       | 1.19       | 1.16      |

**Table S14.** Calculated  $^1\text{H}$  NMR chemical shifts (ppm) of selected low-energy conformers of lactone **6** at mPW1PW91/6-311+G(2d,p)[SMD –  $\text{CHCl}_3$ ]/M062X/6-31+G(d,p) [IEF-PCM- $\text{CHCl}_3$ ].

|           | <i>6-g</i> |
|-----------|------------|
| <b>1</b>  | 1.03       |
| <b>2</b>  | 1.81       |
| <b>3</b>  | 3.61       |
| <b>4</b>  | 2.13       |
| <b>5a</b> | 2.27       |
| <b>5b</b> | 0.90       |
| <b>6</b>  | 2.55       |
| <b>8</b>  | 0.86       |
| <b>9</b>  | 0.88       |
| <b>10</b> | 1.04       |

**Table S15.** Calculated  $^1\text{H}$  NMR chemical shifts (ppm) of selected low-energy conformers of lactone **6'** at mPW1PW91/6-311+G(2d,p)[SMD –  $\text{CHCl}_3$ ]/M062X/6-31+G(d,p) [IEF-PCM- $\text{CHCl}_3$ ].

| <b>6'</b> |      |
|-----------|------|
| <b>1</b>  | 1.06 |
| <b>2</b>  | 1.65 |
| <b>3</b>  | 3.62 |
| <b>4a</b> | 1.99 |
| <b>4b</b> | 1.45 |
| <b>5a</b> | 1.97 |
| <b>5b</b> | 1.70 |
| <b>6a</b> | 2.50 |
| <b>6b</b> | 2.27 |
| <b>8</b>  | 0.87 |

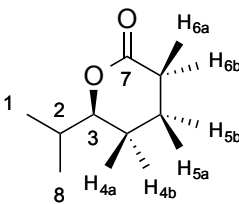

**Table S16.** Electronic Energies ( $E$ ), and Gibbs Free Energies ( $G$ ) of low-energy conformers of lactone **1** at M06-2X/6-31+G(d,p) [IEF-PCM –  $\text{CHCl}_3$ ].

|            | $E$ (au)     | $\Delta G$ (au) | $\Delta\Delta G$ (kcal mol $^{-1}$ ) |
|------------|--------------|-----------------|--------------------------------------|
| <b>1-a</b> | -691.3896819 | -691.174208     | 0.00                                 |
| <b>1-b</b> | -691.3881658 | -691.171776     | 1.53                                 |
| <b>1-c</b> | -691.3863526 | -691.169712     | 2.82                                 |
| <b>1-d</b> | -691.3840265 | -691.167033     | 4.50                                 |
| <b>1-e</b> | -691.3839420 | -691.167852     | 3.99                                 |
| <b>1-f</b> | -691.3840918 | -691.166536     | 4.81                                 |

**Table S17.** Geometries of low-energy conformers at M06-2X/6-31+G(d,p) [IEF-PCM –  $\text{CHCl}_3$ ] of lactone **1**.

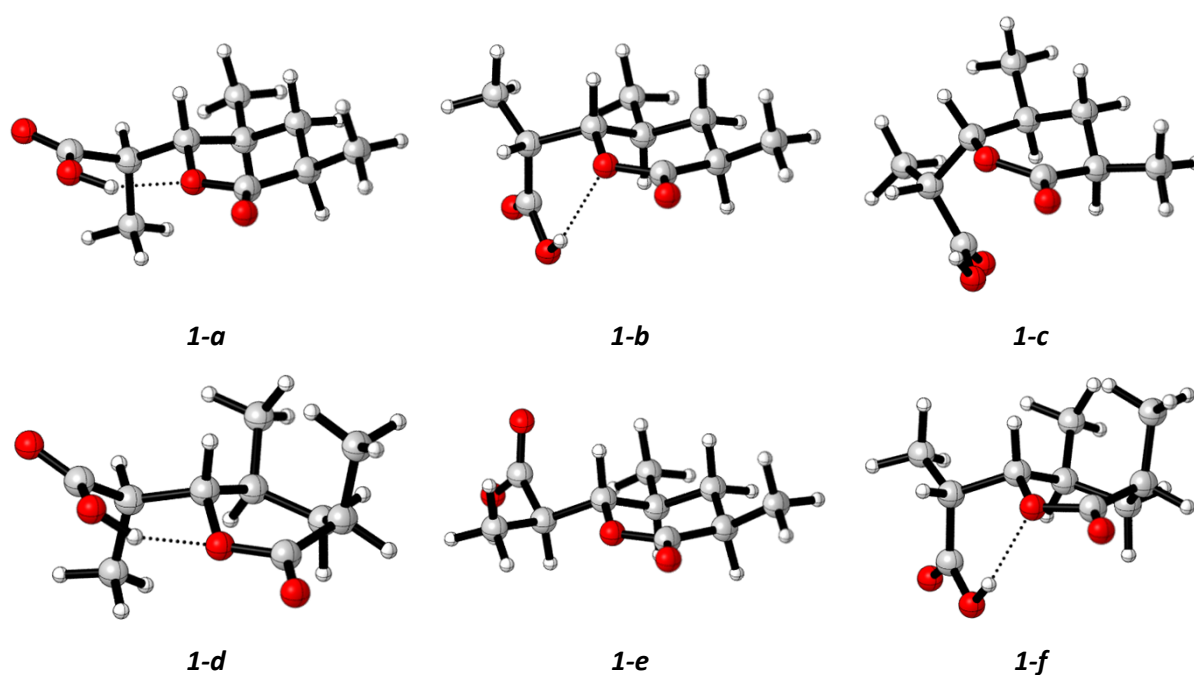

**Table S18.** Electronic Energies ( $E$ ), and Gibbs Free Energies ( $G$ ) of low-energy conformers of lactone **6''** at M06-2X/6-31+G(d,p) [IEF-PCM – CHCl<sub>3</sub>].

|              | $E$ (au)     | $\Delta G$ (au) | $\Delta\Delta G$ (kcal mol <sup>-1</sup> ) |
|--------------|--------------|-----------------|--------------------------------------------|
| <b>6''-a</b> | -691.3856025 | -691.168917     | 2.35                                       |
| <b>6''-b</b> | -691.3878394 | -691.170757     | 1.20                                       |
| <b>6''-c</b> | -691.3890941 | -691.172665     | 0.00                                       |
| <b>6''-d</b> | -691.3856159 | -691.169277     | 2.13                                       |
| <b>6''-e</b> | -691.3867743 | -691.170081     | 1.62                                       |
| <b>6''-f</b> | -691.3795075 | -691.162771     | 6.21                                       |
| <b>6''-g</b> | -691.3778268 | -691.16207      | 6.65                                       |
| <b>6''-h</b> | -691.3797878 | -691.162339     | 6.48                                       |
| <b>6''-i</b> | -691.3825572 | -691.165091     | 4.75                                       |
| <b>6''-j</b> | -691.3827461 | -691.165383     | 4.57                                       |

**Table S19.** Geometries of low-energy conformers at M06-2X/6-31+G(d,p) [IEF-PCM – CHCl<sub>3</sub>] of lactone **6''**.

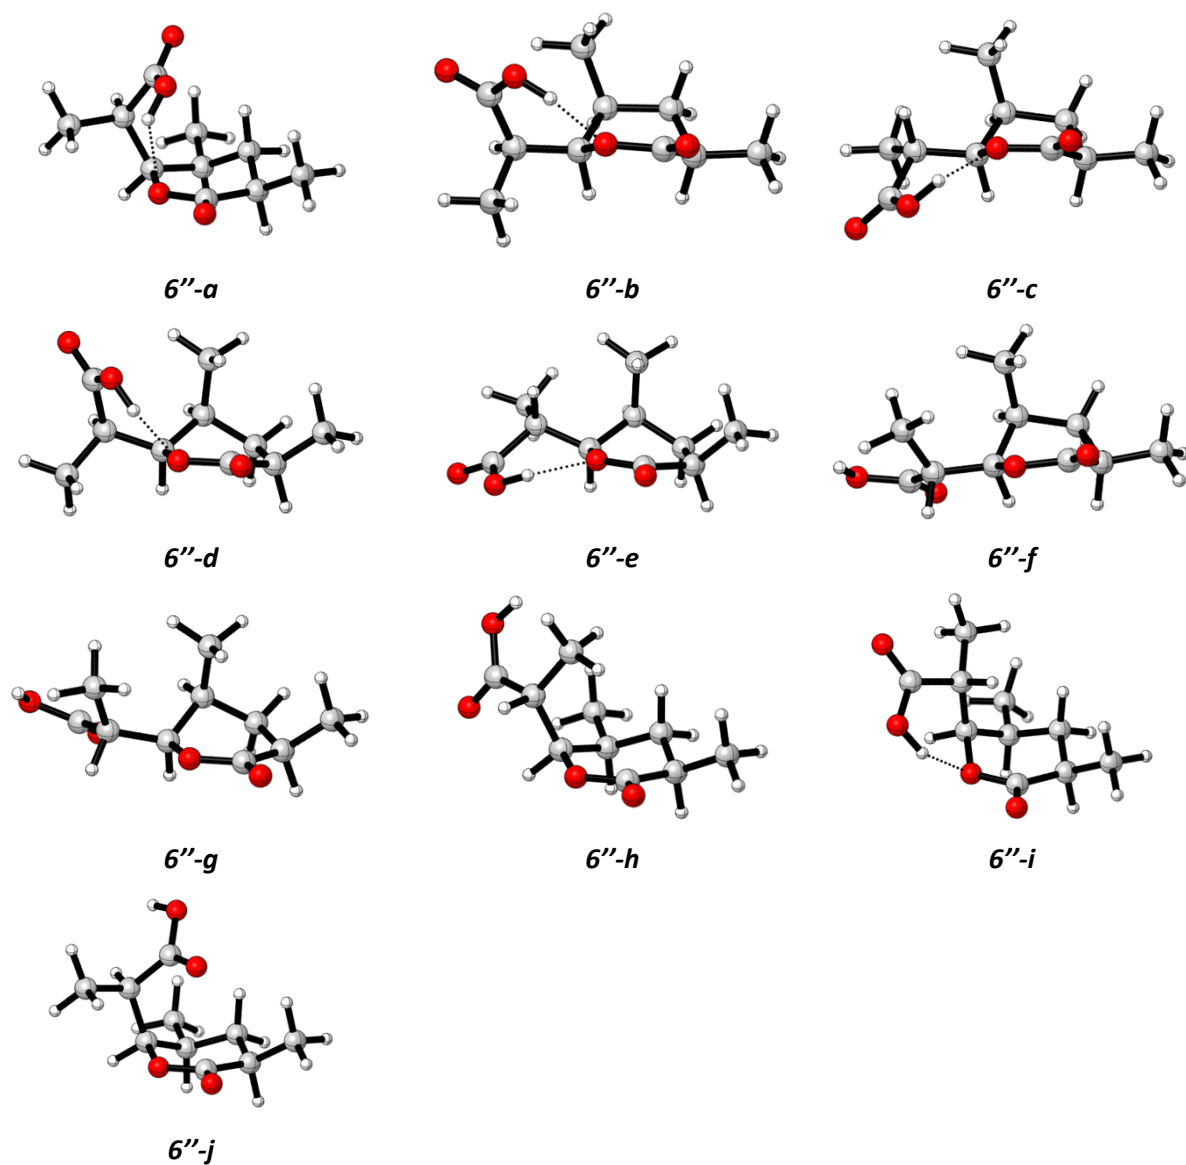

**CARTESIAN COORDINATES****LACTONE 2'****clust-01**

|   |           |          |          |
|---|-----------|----------|----------|
| C | -6.73532  | 0.68006  | 2.67367  |
| C | -8.06874  | 2.94202  | 2.21619  |
| C | -8.21531  | 2.53712  | 3.68953  |
| C | -7.37817  | 1.25651  | 3.95165  |
| H | -5.96094  | 1.37912  | 2.33352  |
| H | -7.02100  | 3.19681  | 2.00602  |
| H | -7.80132  | 3.35860  | 4.28418  |
| H | -8.02077  | 0.48101  | 4.38601  |
| H | -6.58443  | 1.44912  | 4.67935  |
| C | -7.78981  | 0.65105  | 1.58807  |
| O | -8.11117  | -0.32496 | 0.94888  |
| O | -8.43068  | 1.81715  | 1.38162  |
| C | -8.92851  | 4.11427  | 1.74730  |
| H | -9.98130  | 3.80640  | 1.79145  |
| C | -8.62121  | 4.42554  | 0.28474  |
| H | -9.32474  | 5.18031  | -0.09555 |
| H | -8.73073  | 3.51322  | -0.31309 |
| C | -6.65546  | 4.60715  | -1.04162 |
| H | -5.78171  | 5.26256  | -1.09762 |
| H | -7.31382  | 4.83926  | -1.89072 |
| C | -5.47318  | 0.45684  | -1.06621 |
| C | -6.45565  | 0.90070  | -1.94833 |
| C | -6.83010  | 2.24518  | -1.95679 |
| C | -6.23058  | 3.15624  | -1.08552 |
| C | -5.24160  | 2.70268  | -0.20535 |
| C | -4.86226  | 1.36200  | -0.19585 |
| H | -5.18897  | -0.59074 | -1.04979 |
| H | -6.94045  | 0.19952  | -2.62008 |
| H | -7.60205  | 2.58811  | -2.64176 |
| H | -4.77024  | 3.40916  | 0.47500  |
| H | -4.09136  | 1.02059  | 0.48974  |
| C | -8.71600  | 5.35062  | 2.62369  |
| H | -7.65469  | 5.61280  | 2.66975  |
| H | -9.25316  | 6.20523  | 2.20214  |
| H | -9.07850  | 5.19549  | 3.64315  |
| O | -7.29577  | 4.92966  | 0.18428  |
| C | -9.67794  | 2.32437  | 4.08863  |
| H | -9.73714  | 1.98764  | 5.12752  |
| H | -10.26902 | 3.24011  | 3.99954  |
| H | -10.14100 | 1.55671  | 3.45885  |
| C | -6.11020  | -0.68988 | 2.88400  |
| H | -5.63758  | -1.04662 | 1.96516  |
| H | -5.35335  | -0.63873 | 3.67173  |
| H | -6.86977  | -1.42006 | 3.17679  |

**clust-02**

|   |           |          |         |
|---|-----------|----------|---------|
| C | -8.13300  | -0.02923 | 3.08627 |
| C | -8.58513  | 2.40505  | 2.08548 |
| C | -7.71554  | 2.51897  | 3.34680 |
| C | -7.50477  | 1.09562  | 3.93058 |
| H | -7.61869  | -0.07457 | 2.11676 |
| H | -7.98789  | 1.86678  | 1.33887 |
| H | -6.75040  | 2.90722  | 3.00106 |
| H | -7.95890  | 1.04467  | 4.92812 |
| H | -6.43973  | 0.88407  | 4.06232 |
| C | -9.57196  | 0.35308  | 2.80640 |
| O | -10.53328 | -0.35885 | 2.98797 |

|   |           |          |          |
|---|-----------|----------|----------|
| O | -9.75933  | 1.60848  | 2.35480  |
| C | -9.08098  | 3.67899  | 1.39014  |
| H | -9.49665  | 3.33309  | 0.43396  |
| C | -7.90555  | 4.61271  | 1.09440  |
| H | -7.51838  | 5.03755  | 2.02647  |
| H | -8.25084  | 5.44528  | 0.46285  |
| C | -7.03249  | 3.56881  | -0.84893 |
| H | -7.45764  | 4.41261  | -1.41637 |
| H | -7.76044  | 2.74497  | -0.89492 |
| C | -3.37079  | 2.32145  | -2.75428 |
| C | -4.60858  | 1.99512  | -3.31117 |
| C | -5.78405  | 2.39070  | -2.67758 |
| C | -5.73881  | 3.12315  | -1.48710 |
| C | -4.49955  | 3.44718  | -0.93306 |
| C | -3.32107  | 3.04509  | -1.56438 |
| H | -2.45331  | 2.01005  | -3.24368 |
| H | -4.65819  | 1.42723  | -4.23508 |
| H | -6.74667  | 2.12739  | -3.11028 |
| H | -4.46419  | 4.00868  | -0.00581 |
| H | -2.36204  | 3.29925  | -1.12322 |
| C | -10.20462 | 4.44651  | 2.09466  |
| H | -9.84581  | 5.03505  | 2.94147  |
| H | -10.67074 | 5.13760  | 1.38628  |
| H | -10.97506 | 3.76068  | 2.45352  |
| O | -6.80096  | 3.96740  | 0.48482  |
| C | -8.26027  | 3.44967  | 4.43329  |
| H | -7.66221  | 3.33641  | 5.34258  |
| H | -8.21847  | 4.50141  | 4.14359  |
| H | -9.29786  | 3.19808  | 4.67980  |
| C | -8.03890  | -1.38953 | 3.76302  |
| H | -8.48535  | -2.16969 | 3.14341  |
| H | -6.99077  | -1.64215 | 3.94402  |
| H | -8.56433  | -1.37845 | 4.72214  |

**clust-03**

|   |           |          |          |
|---|-----------|----------|----------|
| C | -7.00596  | 0.65079  | 2.67509  |
| C | -8.20364  | 2.98478  | 2.19717  |
| C | -8.48532  | 2.53707  | 3.63806  |
| C | -7.71813  | 1.21768  | 3.92024  |
| H | -6.17646  | 1.32214  | 2.41940  |
| H | -7.13255  | 3.20029  | 2.07966  |
| H | -8.09391  | 3.32184  | 4.29427  |
| H | -8.41907  | 0.45705  | 4.28511  |
| H | -6.97190  | 1.35886  | 4.70759  |
| C | -7.96990  | 0.70578  | 1.50912  |
| O | -8.27710  | -0.23133 | 0.80776  |
| O | -8.54362  | 1.90505  | 1.29663  |
| C | -8.97537  | 4.20743  | 1.70410  |
| H | -10.03901 | 3.94135  | 1.64940  |
| C | -8.53535  | 4.55656  | 0.28442  |
| H | -9.17312  | 5.35515  | -0.12130 |
| H | -8.63267  | 3.67263  | -0.35652 |
| C | -6.45595  | 4.68223  | -0.86434 |
| H | -5.55641  | 5.30328  | -0.83058 |
| H | -7.03010  | 4.95808  | -1.76007 |
| C | -5.43050  | 0.49045  | -0.89066 |
| C | -6.34378  | 0.98454  | -1.81927 |
| C | -6.66571  | 2.34233  | -1.82683 |
| C | -6.08397  | 3.21697  | -0.90707 |
| C | -5.16657  | 2.71257  | 0.02129  |
| C | -4.83813  | 1.35827  | 0.02896  |

|   |           |          |          |
|---|-----------|----------|----------|
| H | -5.18638  | -0.56723 | -0.87667 |
| H | -6.81547  | 0.31221  | -2.52872 |
| H | -7.38202  | 2.72504  | -2.55009 |
| H | -4.71003  | 3.38984  | 0.74028  |
| H | -4.12180  | 0.97737  | 0.75183  |
| C | -8.79157  | 5.40328  | 2.64104  |
| H | -7.72908  | 5.62056  | 2.78628  |
| H | -9.25840  | 6.29287  | 2.20820  |
| H | -9.24554  | 5.22828  | 3.61987  |
| O | -7.18630  | 5.00464  | 0.31042  |
| C | -9.98264  | 2.36588  | 3.90794  |
| H | -10.13961 | 1.99937  | 4.92635  |
| H | -10.53304 | 3.30484  | 3.80173  |
| H | -10.41734 | 1.63569  | 3.21645  |
| C | -6.46039  | -0.75274 | 2.88687  |
| H | -5.93382  | -1.10403 | 1.99569  |
| H | -5.76541  | -0.75979 | 3.73126  |
| H | -7.27159  | -1.45541 | 3.09744  |

**clust-04**

|   |           |          |          |
|---|-----------|----------|----------|
| C | -7.85905  | 0.34314  | 3.60355  |
| C | -7.66951  | 3.25735  | 3.10955  |
| C | -8.26549  | 2.68609  | 4.40276  |
| C | -8.90465  | 1.33219  | 4.10903  |
| H | -7.20894  | 0.07857  | 4.45075  |
| H | -6.99695  | 4.08657  | 3.35242  |
| H | -7.41556  | 2.51433  | 5.07880  |
| H | -9.70713  | 1.44070  | 3.36688  |
| H | -9.37221  | 0.92958  | 5.01426  |
| C | -6.89307  | 0.95375  | 2.60046  |
| O | -6.15958  | 0.27174  | 1.91706  |
| O | -6.77637  | 2.28808  | 2.50397  |
| C | -8.69746  | 3.76662  | 2.06918  |
| H | -9.63076  | 3.19771  | 2.17930  |
| C | -8.24335  | 3.54419  | 0.62892  |
| H | -9.03586  | 3.90004  | -0.04870 |
| H | -8.07826  | 2.47845  | 0.42388  |
| C | -6.69695  | 4.38313  | -0.95864 |
| H | -5.87682  | 5.10790  | -0.99134 |
| H | -7.53301  | 4.79769  | -1.54350 |
| C | -5.35952  | 0.67973  | -2.72846 |
| C | -5.29709  | 0.85828  | -1.34609 |
| C | -5.73072  | 2.05222  | -0.77116 |
| C | -6.24839  | 3.07190  | -1.57282 |
| C | -6.32383  | 2.88382  | -2.95532 |
| C | -5.87302  | 1.69741  | -3.53349 |
| H | -5.01947  | -0.24922 | -3.17595 |
| H | -4.91956  | 0.06804  | -0.70434 |
| H | -5.69352  | 2.18155  | 0.30679  |
| H | -6.73916  | 3.66857  | -3.58411 |
| H | -5.93339  | 1.56339  | -4.60939 |
| C | -8.99478  | 5.25693  | 2.27976  |
| H | -8.09032  | 5.84459  | 2.10144  |
| H | -9.75958  | 5.58889  | 1.57095  |
| H | -9.35456  | 5.47606  | 3.28552  |
| O | -7.05920  | 4.28453  | 0.40177  |
| C | -9.23768  | 3.62971  | 5.10649  |
| H | -9.53139  | 3.19575  | 6.06636  |
| H | -8.78683  | 4.60688  | 5.30288  |
| H | -10.14873 | 3.77886  | 4.51790  |
| C | -8.47161  | -0.94047 | 3.04527  |

|   |          |          |         |
|---|----------|----------|---------|
| H | -7.69703 | -1.64877 | 2.74894 |
| H | -9.10609 | -1.40565 | 3.80463 |
| H | -9.09081 | -0.72043 | 2.16981 |

**clust-05**

|   |           |          |          |
|---|-----------|----------|----------|
| C | -7.46887  | 0.63251  | 2.84989  |
| C | -8.47979  | 3.25254  | 3.66257  |
| C | -9.42566  | 2.06336  | 3.49439  |
| C | -8.86337  | 1.11634  | 2.44299  |
| H | -7.59844  | -0.10915 | 3.65249  |
| H | -8.80380  | 3.82614  | 4.53684  |
| H | -9.42085  | 1.53998  | 4.46156  |
| H | -8.82561  | 1.61751  | 1.46503  |
| H | -9.51803  | 0.24667  | 2.31732  |
| C | -6.59538  | 1.69090  | 3.51999  |
| O | -5.40618  | 1.52906  | 3.68228  |
| O | -7.15567  | 2.80127  | 4.03916  |
| C | -8.37176  | 4.22141  | 2.46014  |
| H | -9.25426  | 4.08030  | 1.82445  |
| C | -7.16168  | 3.92508  | 1.57751  |
| H | -7.06558  | 2.84918  | 1.37525  |
| H | -6.23145  | 4.25463  | 2.06582  |
| C | -6.35262  | 4.27031  | -0.60644 |
| H | -5.34407  | 4.42187  | -0.19445 |
| H | -6.48937  | 4.97401  | -1.43322 |
| C | -6.77414  | 0.22370  | -2.05921 |
| C | -7.90532  | 0.98918  | -1.76884 |
| C | -7.76551  | 2.29283  | -1.29745 |
| C | -6.49451  | 2.84486  | -1.10458 |
| C | -5.36802  | 2.07016  | -1.38491 |
| C | -5.50516  | 0.76711  | -1.86722 |
| H | -6.88269  | -0.79265 | -2.42471 |
| H | -8.89672  | 0.56880  | -1.90916 |
| H | -8.64282  | 2.89107  | -1.06375 |
| H | -4.37656  | 2.48403  | -1.21765 |
| H | -4.62082  | 0.17418  | -2.07910 |
| C | -8.33931  | 5.67662  | 2.93151  |
| H | -7.49834  | 5.83257  | 3.61686  |
| H | -8.22262  | 6.35447  | 2.08244  |
| H | -9.26211  | 5.93827  | 3.45830  |
| O | -7.33530  | 4.61281  | 0.35208  |
| C | -10.86082 | 2.49678  | 3.20280  |
| H | -11.53383 | 1.64028  | 3.29736  |
| H | -11.19542 | 3.26813  | 3.90431  |
| H | -10.96810 | 2.88939  | 2.18728  |
| C | -6.71868  | -0.03290 | 1.69596  |
| H | -5.75945  | -0.43377 | 2.02662  |
| H | -7.32397  | -0.84814 | 1.28903  |
| H | -6.53519  | 0.68261  | 0.88603  |

**clust-06**

|   |          |         |         |
|---|----------|---------|---------|
| C | -7.77485 | 0.45772 | 4.48321 |
| C | -8.14101 | 2.59429 | 2.90566 |
| C | -9.34435 | 2.41464 | 3.84079 |
| C | -9.06496 | 1.23745 | 4.81097 |
| H | -6.91444 | 1.08942 | 4.74355 |
| H | -7.25569 | 2.85226 | 3.50661 |
| H | -9.43258 | 3.33785 | 4.42285 |
| H | -9.90203 | 0.53013 | 4.77605 |
| H | -8.99674 | 1.58993 | 5.84411 |
| C | -7.69684 | 0.24084 | 2.98725 |

|                 |           |          |          |                 |           |          |          |
|-----------------|-----------|----------|----------|-----------------|-----------|----------|----------|
| O               | -7.50213  | -0.82210 | 2.44371  | C               | -4.12994  | 3.30927  | -2.21232 |
| O               | -7.87456  | 1.34275  | 2.23278  | H               | -3.44841  | 1.76600  | -3.55586 |
| C               | -8.29571  | 3.65006  | 1.81335  | H               | -5.74526  | 1.04541  | -4.16646 |
| H               | -9.07864  | 3.31623  | 1.12040  | H               | -7.70837  | 2.17366  | -3.15801 |
| C               | -6.99955  | 3.75615  | 1.01509  | H               | -5.10054  | 4.75843  | -0.94373 |
| H               | -6.70532  | 2.77224  | 0.62958  | H               | -3.12763  | 3.62441  | -1.93851 |
| H               | -6.18760  | 4.13282  | 1.66159  | C               | -5.87468  | 3.82819  | 2.35102  |
| C               | -6.08251  | 4.80153  | -0.89417 | H               | -5.31048  | 2.90493  | 2.17690  |
| H               | -5.18693  | 5.03588  | -0.29885 | H               | -5.54404  | 4.57391  | 1.62381  |
| H               | -6.29520  | 5.66631  | -1.53106 | H               | -5.63584  | 4.19450  | 3.35388  |
| C               | -5.33753  | 1.37911  | -3.42024 | O               | -7.59385  | 4.45376  | 0.00683  |
| C               | -6.63864  | 1.68423  | -3.01798 | C               | -10.33770 | 2.87922  | 2.64747  |
| C               | -6.87814  | 2.78201  | -2.19346 | H               | -11.31724 | 2.95677  | 3.12886  |
| C               | -5.81919  | 3.58231  | -1.75623 | H               | -10.15107 | 3.81672  | 2.11597  |
| C               | -4.51841  | 3.26555  | -2.15228 | H               | -10.39179 | 2.06593  | 1.91583  |
| C               | -4.27701  | 2.17320  | -2.98605 | C               | -8.89564  | -1.02189 | 5.22860  |
| H               | -5.15134  | 0.52340  | -4.06161 | H               | -8.05765  | -1.71914 | 5.28616  |
| H               | -7.46775  | 1.06441  | -3.34530 | H               | -9.26991  | -0.83830 | 6.23927  |
| H               | -7.88861  | 3.01927  | -1.87185 | H               | -9.69000  | -1.49581 | 4.64511  |
| H               | -3.68733  | 3.87469  | -1.80407 |                 |           |          |          |
| H               | -3.26086  | 1.93714  | -3.28685 |                 |           |          |          |
| C               | -8.67394  | 5.00802  | 2.40750  | <b>clust-08</b> |           |          |          |
| H               | -7.95905  | 5.29923  | 3.18684  | C               | -8.40142  | -0.19033 | 4.03343  |
| H               | -8.65313  | 5.77035  | 1.62663  | C               | -7.96776  | 2.11573  | 2.73658  |
| H               | -9.67353  | 4.99901  | 2.84944  | C               | -8.09751  | 2.37373  | 4.24375  |
| O               | -7.20859  | 4.66298  | -0.05355 | C               | -8.27419  | 1.02014  | 4.98058  |
| C               | -10.64623 | 2.19045  | 3.06691  | H               | -7.42396  | -0.36742 | 3.56387  |
| H               | -11.46905 | 2.01680  | 3.76591  | H               | -7.05718  | 1.52617  | 2.55170  |
| H               | -10.91098 | 3.04955  | 2.44468  | H               | -7.15607  | 2.83073  | 4.56617  |
| H               | -10.56386 | 1.31157  | 2.41809  | H               | -9.18017  | 1.05745  | 5.59720  |
| C               | -7.67669  | -0.85498 | 5.24708  | H               | -7.43985  | 0.83479  | 5.66301  |
| H               | -6.73585  | -1.36644 | 5.03425  | C               | -9.35084  | 0.16676  | 2.90974  |
| H               | -7.73669  | -0.66412 | 6.32203  | O               | -10.29572 | -0.49932 | 2.55340  |
| H               | -8.49547  | -1.52345 | 4.96667  | O               | -9.10010  | 1.33572  | 2.28936  |
|                 |           |          |          | C               | -7.91737  | 3.35535  | 1.84639  |
|                 |           |          |          | H               | -8.88266  | 3.87209  | 1.91848  |
|                 |           |          |          | C               | -7.72838  | 2.93236  | 0.39259  |
| <b>clust-07</b> |           |          |          | H               | -8.50702  | 2.21985  | 0.08935  |
| C               | -8.47327  | 0.29242  | 4.58735  | H               | -6.74667  | 2.44431  | 0.27407  |
| C               | -7.84136  | 2.46778  | 3.16352  | C               | -7.58900  | 3.81223  | -1.79212 |
| C               | -9.27292  | 2.58985  | 3.70685  | H               | -7.87072  | 4.72651  | -2.32401 |
| C               | -9.63136  | 1.30502  | 4.49648  | H               | -8.25831  | 3.00627  | -2.12835 |
| H               | -7.66208  | 0.73673  | 5.18013  | C               | -3.48679  | 2.84739  | -2.73579 |
| H               | -7.16125  | 2.47799  | 4.02494  | C               | -4.52621  | 2.20226  | -3.40367 |
| H               | -9.24161  | 3.44003  | 4.39930  | C               | -5.85239  | 2.50048  | -3.08591 |
| H               | -10.47225 | 0.79948  | 4.00542  | C               | -6.15114  | 3.45249  | -2.11017 |
| H               | -9.96428  | 1.54889  | 5.50943  | C               | -5.10393  | 4.09485  | -1.44219 |
| C               | -7.92695  | 0.07766  | 3.19043  | C               | -3.77937  | 3.79274  | -1.75057 |
| O               | -7.74873  | -0.99852 | 2.66787  | H               | -2.45473  | 2.61274  | -2.97699 |
| O               | -7.66093  | 1.19959  | 2.49301  | H               | -4.30673  | 1.46024  | -4.16520 |
| C               | -7.37493  | 3.56525  | 2.19896  | H               | -6.66113  | 1.98564  | -3.59915 |
| H               | -7.92309  | 4.48038  | 2.45982  | H               | -5.33820  | 4.82507  | -0.67202 |
| C               | -7.69510  | 3.24303  | 0.73996  | H               | -2.97372  | 4.29542  | -1.22402 |
| H               | -8.70136  | 2.82246  | 0.61533  | C               | -6.79119  | 4.29786  | 2.27508  |
| H               | -6.97639  | 2.50418  | 0.35962  | H               | -5.83048  | 3.76816  | 2.28713  |
| C               | -7.72180  | 4.26216  | -1.38937 | H               | -6.71365  | 5.12396  | 1.56548  |
| H               | -7.81772  | 5.26585  | -1.81491 | H               | -6.96155  | 4.71843  | 3.26942  |
| H               | -8.64449  | 3.70700  | -1.61587 | O               | -7.79946  | 4.08894  | -0.42259 |
| C               | -4.30958  | 2.26484  | -3.12240 | C               | -9.24929  | 3.32788  | 4.57019  |
| C               | -5.59816  | 1.86217  | -3.46658 | H               | -9.34444  | 3.43884  | 5.65395  |
| C               | -6.70370  | 2.50002  | -2.90014 | H               | -9.09686  | 4.32302  | 4.14394  |
| C               | -6.53147  | 3.54930  | -1.99716 | H               | -10.19703 | 2.93363  | 4.18727  |
| C               | -5.23484  | 3.94864  | -1.65613 |                 |           |          |          |



|   |          |          |         |
|---|----------|----------|---------|
| C | -8.84102 | -1.45431 | 4.75875 |
| H | -8.89352 | -2.30406 | 4.07524 |
| H | -8.13197 | -1.68963 | 5.55708 |
| H | -9.83062 | -1.31635 | 5.20325 |

**clust-09**

|   |           |          |          |
|---|-----------|----------|----------|
| C | -8.13183  | 0.11191  | 4.44098  |
| C | -8.05222  | 2.16740  | 2.73133  |
| C | -8.44932  | 2.66208  | 4.12868  |
| C | -8.44972  | 1.46281  | 5.11296  |
| H | -7.08053  | 0.12079  | 4.12266  |
| H | -7.01827  | 1.80065  | 2.75383  |
| H | -7.67650  | 3.37363  | 4.43910  |
| H | -9.43761  | 1.37608  | 5.58165  |
| H | -7.73303  | 1.62144  | 5.92381  |
| C | -8.96005  | -0.00119 | 3.17867  |
| O | -9.65909  | -0.94401 | 2.88296  |
| O | -8.90812  | 1.06302  | 2.35652  |
| C | -8.15502  | 3.19119  | 1.60282  |
| H | -9.20980  | 3.47224  | 1.48838  |
| C | -7.72361  | 2.57388  | 0.27653  |
| H | -7.82928  | 3.32284  | -0.52191 |
| H | -8.35090  | 1.70755  | 0.02639  |
| C | -5.84132  | 1.67120  | -0.82755 |
| H | -6.50369  | 0.90126  | -1.25047 |
| H | -4.89352  | 1.19032  | -0.56495 |
| C | -5.07919  | 4.76611  | -3.74120 |
| C | -5.50688  | 3.50630  | -4.15714 |
| C | -5.77162  | 2.51179  | -3.21434 |
| C | -5.59925  | 2.76194  | -1.85213 |
| C | -5.17138  | 4.02797  | -1.44083 |
| C | -4.91548  | 5.02565  | -2.37912 |
| H | -4.87925  | 5.54314  | -4.47233 |
| H | -5.64452  | 3.29926  | -5.21396 |
| H | -6.11859  | 1.53437  | -3.54134 |
| H | -5.05200  | 4.22551  | -0.37872 |
| H | -4.58717  | 6.00661  | -2.04898 |
| C | -7.32149  | 4.43734  | 1.91313  |
| H | -6.28326  | 4.16367  | 2.12645  |
| H | -7.32058  | 5.11055  | 1.05061  |
| H | -7.71519  | 4.99023  | 2.76994  |
| O | -6.36982  | 2.16334  | 0.38640  |
| C | -9.80591  | 3.37118  | 4.13413  |
| H | -10.07832 | 3.64779  | 5.15659  |
| H | -9.79942  | 4.28399  | 3.53210  |
| H | -10.58792 | 2.70999  | 3.74451  |
| C | -8.36146  | -1.07133 | 5.37038  |
| H | -8.10667  | -2.01314 | 4.88024  |
| H | -7.74479  | -0.96443 | 6.26692  |
| H | -9.41068  | -1.12227 | 5.67472  |

**clust-10**

|   |           |          |         |
|---|-----------|----------|---------|
| C | -8.60616  | 0.55924  | 4.67812 |
| C | -9.16859  | 2.13810  | 2.23279 |
| C | -8.96615  | 0.61807  | 2.18935 |
| C | -8.06273  | 0.12986  | 3.31744 |
| H | -9.53392  | -0.00499 | 4.85978 |
| H | -10.07819 | 2.36440  | 1.66464 |
| H | -9.96333  | 0.19301  | 2.37503 |
| H | -7.04017  | 0.49879  | 3.18880 |
| H | -8.00466  | -0.96425 | 3.28970 |

|   |          |          |          |
|---|----------|----------|----------|
| C | -9.07170 | 2.00640  | 4.70887  |
| O | -9.16737 | 2.63727  | 5.73876  |
| O | -9.49708 | 2.58678  | 3.57326  |
| C | -8.08243 | 3.10520  | 1.72187  |
| H | -8.45445 | 4.08829  | 2.03964  |
| C | -8.01674 | 3.18182  | 0.19827  |
| H | -9.02783 | 3.17108  | -0.24111 |
| H | -7.45166 | 2.34178  | -0.22477 |
| C | -7.10244 | 4.51828  | -1.51901 |
| H | -6.78836 | 5.55590  | -1.66844 |
| H | -8.01997 | 4.35544  | -2.10436 |
| C | -3.97450 | 1.86675  | -2.87281 |
| C | -5.08817 | 2.09822  | -3.67803 |
| C | -6.10705 | 2.94358  | -3.23483 |
| C | -6.01642 | 3.57311  | -1.99279 |
| C | -4.89628 | 3.33675  | -1.18929 |
| C | -3.88246 | 2.48640  | -1.62463 |
| H | -3.18391 | 1.20507  | -3.21252 |
| H | -5.17005 | 1.61467  | -4.64661 |
| H | -6.98116 | 3.11191  | -3.85949 |
| H | -4.83228 | 3.81767  | -0.21683 |
| H | -3.01829 | 2.30766  | -0.99201 |
| C | -6.68916 | 2.92260  | 2.32451  |
| H | -6.18833 | 2.03420  | 1.92510  |
| H | -6.07332 | 3.79067  | 2.07735  |
| H | -6.72607 | 2.84359  | 3.41646  |
| O | -7.37204 | 4.39987  | -0.13592 |
| C | -8.49688 | 0.11323  | 0.82622  |
| H | -8.58311 | -0.97624 | 0.79070  |
| H | -9.09835 | 0.52314  | 0.00836  |
| H | -7.44769 | 0.36630  | 0.64570  |
| C | -7.63135 | 0.27649  | 5.81823  |
| H | -8.06772 | 0.53052  | 6.78479  |
| H | -7.36327 | -0.78357 | 5.81784  |
| H | -6.71449 | 0.86129  | 5.69200  |

**clust-11**

|   |           |          |          |
|---|-----------|----------|----------|
| C | -9.68985  | 0.13746  | 3.92700  |
| C | -8.70331  | 2.02764  | 2.31180  |
| C | -7.87983  | 0.73688  | 2.16669  |
| C | -8.44913  | -0.32848 | 3.14228  |
| H | -10.51716 | 0.29800  | 3.22257  |
| H | -9.71385  | 1.80701  | 1.94207  |
| H | -8.04342  | 0.39282  | 1.13783  |
| H | -7.67866  | -0.58962 | 3.87828  |
| H | -8.69501  | -1.25148 | 2.60929  |
| C | -9.36703  | 1.48353  | 4.54215  |
| O | -9.52789  | 1.77845  | 5.70407  |
| O | -8.82477  | 2.38794  | 3.70328  |
| C | -8.25043  | 3.29567  | 1.57494  |
| H | -9.10427  | 3.98298  | 1.64444  |
| C | -8.05714  | 2.98306  | 0.09654  |
| H | -8.92466  | 2.43478  | -0.30749 |
| H | -7.16419  | 2.35602  | -0.04768 |
| C | -7.51531  | 4.02738  | -1.94768 |
| H | -7.62440  | 5.00985  | -2.41720 |
| H | -8.19885  | 3.33187  | -2.45765 |
| C | -3.43103  | 2.68647  | -2.35730 |
| C | -4.40851  | 2.22056  | -3.23482 |
| C | -5.73201  | 2.64176  | -3.09385 |
| C | -6.08667  | 3.53992  | -2.08644 |

|   |           |          |          |
|---|-----------|----------|----------|
| C | -5.10144  | 4.00445  | -1.20925 |
| C | -3.78176  | 3.57796  | -1.34130 |
| H | -2.40266  | 2.35467  | -2.46043 |
| H | -4.14484  | 1.52191  | -4.02287 |
| H | -6.49508  | 2.26545  | -3.77119 |
| H | -5.38179  | 4.69338  | -0.41686 |
| H | -3.02508  | 3.94147  | -0.65266 |
| C | -7.03842  | 4.02234  | 2.16687  |
| H | -6.09620  | 3.52624  | 1.92332  |
| H | -6.99461  | 5.03352  | 1.75563  |
| H | -7.12302  | 4.09515  | 3.25345  |
| O | -7.90544  | 4.20526  | -0.60017 |
| C | -6.37361  | 0.89653  | 2.38939  |
| H | -5.90491  | -0.09167 | 2.42068  |
| H | -5.89025  | 1.46389  | 1.59127  |
| H | -6.17133  | 1.39603  | 3.34323  |
| C | -10.12427 | -0.86926 | 4.98299  |
| H | -11.00543 | -0.51802 | 5.52344  |
| H | -10.36106 | -1.82554 | 4.50901  |
| H | -9.32423  | -1.03113 | 5.71090  |

**clust-12**

|   |           |          |          |
|---|-----------|----------|----------|
| C | -9.95056  | 1.33997  | 4.00047  |
| C | -8.22343  | 1.48365  | 1.59596  |
| C | -8.26075  | 0.24210  | 2.49521  |
| C | -8.62218  | 0.58903  | 3.93607  |
| H | -10.74584 | 0.63368  | 3.71623  |
| H | -8.33014  | 1.13656  | 0.56375  |
| H | -9.08708  | -0.36712 | 2.10063  |
| H | -7.83302  | 1.18338  | 4.40784  |
| H | -8.70909  | -0.33321 | 4.52200  |
| C | -10.07134 | 2.43501  | 2.95219  |
| O | -10.82829 | 3.37352  | 3.07561  |
| O | -9.40011  | 2.31408  | 1.79472  |
| C | -7.02411  | 2.45094  | 1.61149  |
| H | -7.39467  | 3.32131  | 1.05254  |
| C | -5.79432  | 1.92474  | 0.85877  |
| H | -5.27292  | 1.15992  | 1.43740  |
| H | -5.09729  | 2.76342  | 0.71779  |
| C | -6.62683  | 2.19220  | -1.37099 |
| H | -7.61430  | 2.56596  | -1.06494 |
| H | -6.76721  | 1.56468  | -2.25557 |
| C | -4.00824  | 5.50085  | -2.26574 |
| C | -3.56255  | 4.18583  | -2.42333 |
| C | -4.41417  | 3.12227  | -2.13813 |
| C | -5.71856  | 3.35836  | -1.68952 |
| C | -6.15473  | 4.67391  | -1.52892 |
| C | -5.30538  | 5.74390  | -1.81999 |
| H | -3.34491  | 6.33038  | -2.48991 |
| H | -2.55261  | 3.99286  | -2.77183 |
| H | -4.07011  | 2.09776  | -2.25634 |
| H | -7.16531  | 4.86430  | -1.17453 |
| H | -5.65647  | 6.76321  | -1.69296 |
| C | -6.59466  | 2.96519  | 2.98610  |
| H | -6.10242  | 2.18707  | 3.57795  |
| H | -5.88523  | 3.78965  | 2.86743  |
| H | -7.44668  | 3.34916  | 3.55672  |
| O | -6.08685  | 1.31650  | -0.38881 |
| C | -6.98958  | -0.60134 | 2.40746  |
| H | -7.16746  | -1.57853 | 2.86506  |
| H | -6.68140  | -0.76025 | 1.36944  |

|   |           |          |         |
|---|-----------|----------|---------|
| H | -6.16157  | -0.13192 | 2.94768 |
| C | -10.25521 | 1.88354  | 5.39372 |
| H | -11.23745 | 2.35615  | 5.42833 |
| H | -10.22877 | 1.06712  | 6.12061 |
| H | -9.50702  | 2.62700  | 5.68716 |

**clust-13**

|   |           |          |          |
|---|-----------|----------|----------|
| C | -8.07034  | -0.06925 | 2.03873  |
| C | -8.41873  | 2.55797  | 1.72188  |
| C | -6.97086  | 2.26281  | 2.15727  |
| C | -6.85091  | 0.75442  | 2.48575  |
| H | -8.19219  | 0.03950  | 0.95174  |
| H | -8.54609  | 2.11670  | 0.72583  |
| H | -6.35004  | 2.46607  | 1.27830  |
| H | -6.74874  | 0.62481  | 3.57164  |
| H | -5.94539  | 0.33903  | 2.03180  |
| C | -9.27899  | 0.55972  | 2.70389  |
| O | -10.11433 | -0.03853 | 3.34355  |
| O | -9.35802  | 1.90010  | 2.60498  |
| C | -8.90720  | 4.00517  | 1.58983  |
| H | -9.91848  | 3.91670  | 1.17110  |
| C | -8.07619  | 4.74812  | 0.54944  |
| H | -7.00570  | 4.67351  | 0.79269  |
| H | -8.34508  | 5.81384  | 0.54547  |
| C | -7.23640  | 4.23759  | -1.62873 |
| H | -6.77309  | 5.23389  | -1.62401 |
| H | -7.65924  | 4.06069  | -2.62143 |
| C | -4.43929  | 1.16160  | -0.48611 |
| C | -4.05624  | 2.49930  | -0.41884 |
| C | -4.94482  | 3.50146  | -0.81893 |
| C | -6.21789  | 3.17433  | -1.28599 |
| C | -6.59051  | 1.82592  | -1.36131 |
| C | -5.70977  | 0.82466  | -0.96281 |
| H | -3.75266  | 0.38214  | -0.17049 |
| H | -3.07068  | 2.76574  | -0.04997 |
| H | -4.64894  | 4.54601  | -0.75490 |
| H | -7.58434  | 1.56930  | -1.72149 |
| H | -6.00972  | -0.21789 | -1.02066 |
| C | -9.02423  | 4.80646  | 2.89074  |
| H | -8.06798  | 5.21833  | 3.21986  |
| H | -9.70849  | 5.64576  | 2.73732  |
| H | -9.42690  | 4.18576  | 3.69484  |
| O | -8.33704  | 4.19190  | -0.73178 |
| C | -6.42853  | 3.09092  | 3.32331  |
| H | -5.46119  | 2.68277  | 3.63379  |
| H | -6.26981  | 4.13691  | 3.05109  |
| H | -7.10203  | 3.05213  | 4.18630  |
| C | -7.94681  | -1.54605 | 2.38434  |
| H | -8.83793  | -2.09885 | 2.08031  |
| H | -7.07775  | -1.97359 | 1.87661  |
| H | -7.81904  | -1.67931 | 3.46255  |

**clust-14**

|   |          |          |         |
|---|----------|----------|---------|
| C | -8.16615 | -0.21364 | 3.02882 |
| C | -8.73690 | 2.08912  | 1.78264 |
| C | -7.26286 | 2.07997  | 2.20526 |
| C | -6.92766 | 0.66685  | 2.75334 |
| H | -8.54486 | -0.58379 | 2.06579 |
| H | -8.86408 | 1.29217  | 1.03593 |
| H | -6.68315 | 2.25533  | 1.29295 |
| H | -6.37182 | 0.76465  | 3.69292 |

|   |           |          |          |
|---|-----------|----------|----------|
| H | -6.27716  | 0.12547  | 2.05929  |
| C | -9.28340  | 0.63236  | 3.60091  |
| O | -9.92424  | 0.36573  | 4.59266  |
| O | -9.56587  | 1.75778  | 2.91880  |
| C | -9.35124  | 3.35033  | 1.15448  |
| H | -10.31297 | 3.00823  | 0.74839  |
| C | -8.53832  | 3.80899  | -0.05308 |
| H | -9.16170  | 4.44827  | -0.69718 |
| H | -8.22153  | 2.93850  | -0.64997 |
| C | -6.53938  | 4.90473  | -0.68796 |
| H | -5.87908  | 5.67510  | -0.28010 |
| H | -7.11594  | 5.34556  | -1.51452 |
| C | -4.25432  | 1.49712  | -2.02345 |
| C | -4.03523  | 2.04427  | -0.75657 |
| C | -4.76699  | 3.15410  | -0.34250 |
| C | -5.72884  | 3.72724  | -1.18260 |
| C | -5.94058  | 3.17435  | -2.44636 |
| C | -5.20574  | 2.06435  | -2.86866 |
| H | -3.68210  | 0.63409  | -2.34918 |
| H | -3.29068  | 1.60848  | -0.09737 |
| H | -4.59956  | 3.58308  | 0.64345  |
| H | -6.68634  | 3.61415  | -3.10456 |
| H | -5.37906  | 1.64345  | -3.85418 |
| C | -9.66104  | 4.50321  | 2.11318  |
| H | -8.75981  | 5.01134  | 2.45413  |
| H | -10.28257 | 5.24100  | 1.59573  |
| H | -10.21321 | 4.14120  | 2.98286  |
| O | -7.40807  | 4.54718  | 0.37541  |
| C | -6.89489  | 3.16391  | 3.22123  |
| H | -6.92523  | 4.15402  | 2.76570  |
| H | -7.57036  | 3.14656  | 4.08443  |
| H | -5.87832  | 2.99085  | 3.58826  |
| C | -7.84678  | -1.40303 | 3.92349  |
| H | -8.72041  | -2.04386 | 4.05809  |
| H | -7.04207  | -1.99526 | 3.47899  |
| H | -7.52168  | -1.06242 | 4.91052  |

#### clust-15

|   |          |          |          |
|---|----------|----------|----------|
| C | -8.46702 | 0.47238  | 4.18254  |
| C | -8.97599 | 1.57809  | 1.79571  |
| C | -8.03090 | 0.37309  | 1.63959  |
| C | -7.66303 | -0.17513 | 3.03982  |
| H | -9.53269 | 0.24763  | 4.03801  |
| H | -9.94754 | 1.19129  | 2.12958  |
| H | -8.63023 | -0.37825 | 1.10995  |
| H | -6.60027 | 0.01599  | 3.23632  |
| H | -7.79638 | -1.26012 | 3.08039  |
| C | -8.30659 | 1.97455  | 4.05801  |
| O | -7.98372 | 2.71867  | 4.95539  |
| O | -8.50438 | 2.47898  | 2.82449  |
| C | -9.22092 | 2.42101  | 0.54151  |
| H | -9.17272 | 1.73831  | -0.31664 |
| C | -8.13007 | 3.47182  | 0.33543  |
| H | -7.15609 | 3.11245  | 0.68098  |
| H | -8.36560 | 4.38232  | 0.90731  |
| C | -6.95948 | 4.59299  | -1.37893 |
| H | -6.95580 | 5.50104  | -0.75824 |
| H | -7.11010 | 4.88823  | -2.42095 |
| C | -3.28864 | 2.37712  | -0.88952 |
| C | -4.22903 | 1.98716  | -1.84614 |
| C | -5.40118 | 2.72078  | -2.00968 |

|   |           |          |          |
|---|-----------|----------|----------|
| C | -5.65058  | 3.84902  | -1.22074 |
| C | -4.70574  | 4.23204  | -0.26756 |
| C | -3.52705  | 3.50172  | -0.10191 |
| H | -2.37464  | 1.80572  | -0.76052 |
| H | -4.04600  | 1.11270  | -2.46321 |
| H | -6.13973  | 2.41472  | -2.74686 |
| H | -4.89777  | 5.10165  | 0.35665  |
| H | -2.80173  | 3.80755  | 0.64570  |
| C | -10.60107 | 3.08042  | 0.57131  |
| H | -10.70905 | 3.69068  | 1.47471  |
| H | -10.72992 | 3.73037  | -0.29836 |
| H | -11.40012 | 2.33316  | 0.56298  |
| O | -8.07343  | 3.77747  | -1.04915 |
| C | -6.76407  | 0.62073  | 0.81624  |
| H | -6.20315  | -0.31549 | 0.73032  |
| H | -6.98278  | 0.97289  | -0.19630 |
| H | -6.10679  | 1.35203  | 1.29999  |
| C | -8.03469  | -0.01952 | 5.55680  |
| H | -8.61382  | 0.46131  | 6.34756  |
| H | -8.17638  | -1.10131 | 5.62565  |
| H | -6.97807  | 0.20418  | 5.72945  |

#### clust-16

|   |           |          |          |
|---|-----------|----------|----------|
| C | -8.48935  | 0.46932  | 4.25033  |
| C | -8.73970  | 2.57299  | 2.60983  |
| C | -9.14542  | 1.27579  | 1.88740  |
| C | -8.87956  | 0.06648  | 2.81629  |
| H | -9.32223  | 1.02600  | 4.70147  |
| H | -9.48115  | 2.75343  | 3.39889  |
| H | -10.22756 | 1.37507  | 1.73449  |
| H | -8.05498  | -0.53119 | 2.40697  |
| H | -9.75146  | -0.59301 | 2.85570  |
| C | -7.31597  | 1.42397  | 4.15119  |
| O | -6.28023  | 1.32322  | 4.76792  |
| O | -7.45709  | 2.42640  | 3.26215  |
| C | -8.66226  | 3.83743  | 1.75065  |
| H | -9.42797  | 3.74035  | 0.97026  |
| C | -7.31580  | 3.96496  | 1.03782  |
| H | -6.90069  | 2.98514  | 0.78314  |
| H | -6.58613  | 4.47062  | 1.68894  |
| C | -6.36168  | 4.77230  | -0.96351 |
| H | -5.49846  | 5.13869  | -0.38858 |
| H | -6.58741  | 5.49997  | -1.74790 |
| C | -5.55398  | 0.87284  | -2.62713 |
| C | -4.62722  | 1.46502  | -1.77138 |
| C | -4.87704  | 2.73315  | -1.24274 |
| C | -6.04805  | 3.41975  | -1.56680 |
| C | -6.97179  | 2.81881  | -2.42898 |
| C | -6.72896  | 1.55301  | -2.95615 |
| H | -5.36372  | -0.11420 | -3.03707 |
| H | -3.71427  | 0.93965  | -1.50866 |
| H | -4.15982  | 3.18906  | -0.56421 |
| H | -7.88955  | 3.34735  | -2.67588 |
| H | -7.45279  | 1.09572  | -3.62391 |
| C | -8.95402  | 5.09267  | 2.57528  |
| H | -8.26165  | 5.15884  | 3.42173  |
| H | -8.82961  | 5.98838  | 1.96068  |
| H | -9.97579  | 5.08393  | 2.96627  |
| O | -7.51674  | 4.73012  | -0.14002 |
| C | -8.50246  | 1.04503  | 0.51712  |
| H | -8.90793  | 0.12659  | 0.08064  |

|   |          |          |          |
|---|----------|----------|----------|
| H | -8.69961 | 1.86280  | -0.18265 |
| H | -7.41714 | 0.91665  | 0.59825  |
| C | -8.15670 | -0.72992 | 5.12690  |
| H | -7.87361 | -0.41619 | 6.13353  |
| H | -9.02445 | -1.39125 | 5.19583  |
| H | -7.32200 | -1.29523 | 4.70261  |

**clust-17**

|   |           |          |          |
|---|-----------|----------|----------|
| C | -7.67546  | 0.49724  | 3.86917  |
| C | -9.38683  | 2.51170  | 2.52806  |
| C | -9.36402  | 1.03773  | 2.09519  |
| C | -8.02309  | 0.37034  | 2.38784  |
| H | -8.43277  | -0.06141 | 4.44021  |
| H | -10.43076 | 2.77700  | 2.73067  |
| H | -10.10372 | 0.53179  | 2.73179  |
| H | -7.21587  | 0.79597  | 1.78126  |
| H | -8.08021  | -0.69188 | 2.12471  |
| C | -7.81806  | 1.92402  | 4.37080  |
| O | -7.19272  | 2.35268  | 5.31576  |
| O | -8.72676  | 2.73269  | 3.80013  |
| C | -8.86806  | 3.57533  | 1.54554  |
| H | -9.47454  | 3.47623  | 0.63553  |
| C | -7.41049  | 3.37645  | 1.14821  |
| H | -7.27707  | 2.42332  | 0.62228  |
| H | -6.75967  | 3.37407  | 2.04034  |
| C | -5.74360  | 4.25519  | -0.26652 |
| H | -5.00249  | 4.08832  | 0.52947  |
| H | -5.49952  | 5.20156  | -0.75910 |
| C | -5.56827  | 1.05026  | -3.15720 |
| C | -4.47252  | 1.31096  | -2.33593 |
| C | -4.53573  | 2.33649  | -1.39123 |
| C | -5.68557  | 3.11801  | -1.26821 |
| C | -6.78190  | 2.85137  | -2.09456 |
| C | -6.72533  | 1.82147  | -3.03139 |
| H | -5.52396  | 0.24864  | -3.88775 |
| H | -3.57186  | 0.71100  | -2.42259 |
| H | -3.68442  | 2.52779  | -0.74207 |
| H | -7.68235  | 3.45107  | -1.98840 |
| H | -7.58367  | 1.62029  | -3.66532 |
| C | -9.09141  | 4.97766  | 2.11993  |
| H | -8.45826  | 5.14052  | 2.99675  |
| H | -8.85042  | 5.73589  | 1.37356  |
| H | -10.13475 | 5.10711  | 2.42452  |
| O | -7.03071  | 4.43648  | 0.28876  |
| C | -9.80988  | 0.85760  | 0.64399  |
| H | -9.93536  | -0.20661 | 0.42683  |
| H | -10.76625 | 1.35516  | 0.45411  |
| H | -9.07186  | 1.25680  | -0.05983 |
| C | -6.29515  | -0.06046 | 4.20373  |
| H | -6.09550  | -0.00731 | 5.27461  |
| H | -6.23278  | -1.10374 | 3.88255  |
| H | -5.51717  | 0.50639  | 3.68264  |

**clust-18**

|   |           |          |         |
|---|-----------|----------|---------|
| C | -7.73854  | 0.46807  | 3.87476 |
| C | -9.32493  | 2.65127  | 2.64888 |
| C | -9.43797  | 1.19202  | 2.18063 |
| C | -8.14485  | 0.41262  | 2.40408 |
| H | -8.52363  | -0.03635 | 4.45855 |
| H | -10.33456 | 2.99225  | 2.90499 |
| H | -10.19101 | 0.72954  | 2.83443 |

|   |           |          |          |
|---|-----------|----------|----------|
| H | -7.32764  | 0.79267  | 1.78061  |
| H | -8.29508  | -0.63332 | 2.11396  |
| C | -7.73710  | 1.88934  | 4.41104  |
| O | -7.04011  | 2.24143  | 5.33723  |
| O | -8.59312  | 2.78631  | 3.89337  |
| C | -8.76725  | 3.69646  | 1.66810  |
| H | -9.41938  | 3.66920  | 0.78501  |
| C | -7.34897  | 3.39592  | 1.19907  |
| H | -7.31328  | 2.44789  | 0.64873  |
| H | -6.66060  | 3.32363  | 2.05927  |
| C | -5.69795  | 4.17005  | -0.29367 |
| H | -4.93187  | 3.90167  | 0.44917  |
| H | -5.39305  | 5.11018  | -0.76400 |
| C | -5.98172  | 1.09863  | -3.31833 |
| C | -7.07428  | 1.92572  | -3.05194 |
| C | -6.98374  | 2.91165  | -2.07111 |
| C | -5.80306  | 3.07761  | -1.34075 |
| C | -4.71756  | 2.24010  | -1.60398 |
| C | -4.80200  | 1.25911  | -2.59294 |
| H | -6.05179  | 0.33146  | -4.08304 |
| H | -7.99745  | 1.80288  | -3.61030 |
| H | -7.83310  | 3.55529  | -1.85661 |
| H | -3.80043  | 2.35292  | -1.03044 |
| H | -3.95020  | 0.61512  | -2.78894 |
| C | -8.85276  | 5.09660  | 2.28349  |
| H | -8.16826  | 5.18708  | 3.13170  |
| H | -8.58789  | 5.85270  | 1.54311  |
| H | -9.86726  | 5.29872  | 2.64124  |
| O | -6.92859  | 4.44444  | 0.34392  |
| C | -9.95246  | 1.08586  | 0.74493  |
| H | -10.17346 | 0.04125  | 0.50937  |
| H | -10.87133 | 1.66410  | 0.60516  |
| H | -9.21186  | 1.44131  | 0.02062  |
| C | -6.40345  | -0.21780 | 4.14914  |
| H | -6.16393  | -0.20677 | 5.21317  |
| H | -6.44589  | -1.25510 | 3.80622  |
| H | -5.59543  | 0.28866  | 3.61204  |

**clust-19**

|   |           |          |          |
|---|-----------|----------|----------|
| C | -7.68525  | 0.88128  | 4.56377  |
| C | -8.01024  | 2.56108  | 2.50088  |
| C | -9.15822  | 1.54167  | 2.54037  |
| C | -8.97108  | 0.60246  | 3.76065  |
| H | -7.78917  | 1.85558  | 5.06061  |
| H | -8.07252  | 3.21087  | 3.38704  |
| H | -10.08137 | 2.11594  | 2.67374  |
| H | -8.92737  | -0.43784 | 3.41596  |
| H | -9.82471  | 0.66988  | 4.44109  |
| C | -6.53504  | 1.01711  | 3.58889  |
| O | -5.48239  | 0.42454  | 3.66152  |
| O | -6.74682  | 1.85681  | 2.55817  |
| C | -7.95501  | 3.44311  | 1.25819  |
| H | -7.79890  | 2.78903  | 0.39442  |
| C | -6.76364  | 4.40747  | 1.36530  |
| H | -5.83012  | 3.84801  | 1.50349  |
| H | -6.90730  | 5.05305  | 2.24212  |
| C | -5.76536  | 4.82473  | -0.76817 |
| H | -4.76499  | 4.65846  | -0.34395 |
| H | -5.70583  | 5.64975  | -1.48321 |
| C | -7.34134  | 1.20803  | -2.49674 |
| C | -7.95601  | 2.43712  | -2.75172 |

|                 |           |          |          |                 |           |          |          |
|-----------------|-----------|----------|----------|-----------------|-----------|----------|----------|
| C               | -7.41301  | 3.60779  | -2.22930 | H               | -10.95852 | 0.61262  | 2.41500  |
| C               | -6.25630  | 3.56503  | -1.44305 | H               | -11.21925 | 2.35761  | 2.54586  |
| C               | -5.63840  | 2.33625  | -1.20761 | H               | -10.34444 | 1.68622  | 1.15251  |
| C               | -6.17869  | 1.15940  | -1.73003 | C               | -5.83019  | -0.25586 | 2.89474  |
| H               | -7.76782  | 0.29361  | -2.89740 | H               | -4.97882  | -0.28092 | 3.57616  |
| H               | -8.85782  | 2.47876  | -3.35494 | H               | -6.21614  | -1.27160 | 2.77158  |
| H               | -7.89955  | 4.56379  | -2.40849 | H               | -5.47850  | 0.09685  | 1.92009  |
| H               | -4.74582  | 2.29419  | -0.58797 |                 |           |          |          |
| H               | -5.69768  | 0.20738  | -1.52830 | <b>clust-21</b> |           |          |          |
| C               | -9.25458  | 4.22619  | 1.07536  | C               | -8.43937  | 0.10201  | 2.17989  |
| H               | -9.49267  | 4.80323  | 1.97771  | C               | -8.66897  | 2.90566  | 3.07445  |
| H               | -9.14319  | 4.92775  | 0.24545  | C               | -9.85180  | 2.14527  | 2.43141  |
| H               | -10.10164 | 3.57059  | 0.85623  | C               | -9.39808  | 1.05463  | 1.46776  |
| O               | -6.65000  | 5.27765  | 0.24879  | H               | -8.96364  | -0.30587 | 3.05806  |
| C               | -9.25821  | 0.73462  | 1.24265  | H               | -8.96786  | 3.12353  | 4.10672  |
| H               | -10.02965 | -0.03448 | 1.34108  | H               | -10.34672 | 1.62540  | 3.26385  |
| H               | -9.51404  | 1.35943  | 0.38237  | H               | -8.92275  | 1.49697  | 0.58618  |
| H               | -8.30666  | 0.23528  | 1.02688  | H               | -10.27222 | 0.49015  | 1.12360  |
| C               | -7.40874  | -0.18621 | 5.61294  | C               | -7.26227  | 0.86425  | 2.75810  |
| H               | -6.50978  | 0.04745  | 6.18683  | O               | -6.14795  | 0.39717  | 2.85728  |
| H               | -8.25525  | -0.25798 | 6.30120  | O               | -7.46387  | 2.10996  | 3.21708  |
| H               | -7.26294  | -1.16083 | 5.13887  | C               | -8.21469  | 4.26036  | 2.48926  |
|                 |           |          |          | H               | -9.11706  | 4.83704  | 2.25847  |
| <b>clust-20</b> |           |          |          | C               | -7.36362  | 4.17728  | 1.22971  |
| C               | -6.93713  | 0.65373  | 3.42000  | H               | -6.44602  | 3.60869  | 1.43764  |
| C               | -8.53660  | 3.07639  | 2.90935  | H               | -7.06795  | 5.19631  | 0.93720  |
| C               | -9.18918  | 1.69231  | 3.00013  | C               | -7.45505  | 3.69303  | -1.08750 |
| C               | -8.18987  | 0.63203  | 2.54648  | H               | -7.24005  | 4.74925  | -1.30993 |
| H               | -7.22598  | 0.31451  | 4.42684  | H               | -8.18939  | 3.34078  | -1.81959 |
| H               | -9.14391  | 3.80402  | 3.45900  | C               | -3.85899  | 1.33284  | -1.49371 |
| H               | -9.40173  | 1.52225  | 4.06525  | C               | -4.82537  | 0.97806  | -0.55215 |
| H               | -7.91244  | 0.79378  | 1.49554  | C               | -5.97934  | 1.74668  | -0.41816 |
| H               | -8.64602  | -0.36293 | 2.59938  | C               | -6.18124  | 2.87930  | -1.20797 |
| C               | -6.41588  | 2.06032  | 3.66276  | C               | -5.20371  | 3.23623  | -2.13957 |
| O               | -5.26575  | 2.29123  | 3.96479  | C               | -4.05209  | 2.46346  | -2.28811 |
| O               | -7.28384  | 3.08920  | 3.64459  | H               | -2.95746  | 0.73809  | -1.60149 |
| C               | -8.31424  | 3.60657  | 1.47399  | H               | -4.68236  | 0.11115  | 0.08632  |
| H               | -8.24285  | 2.75409  | 0.78807  | H               | -6.72901  | 1.47817  | 0.31914  |
| C               | -7.00652  | 4.41041  | 1.36724  | H               | -5.34191  | 4.12489  | -2.75124 |
| H               | -6.13499  | 3.79171  | 1.61454  | H               | -3.30023  | 2.75068  | -3.01682 |
| H               | -7.03218  | 5.24242  | 2.08098  | C               | -7.41204  | 5.02356  | 3.55150  |
| C               | -5.97985  | 4.24838  | -0.78453 | H               | -6.51470  | 4.46410  | 3.83306  |
| H               | -4.99242  | 4.12831  | -0.31671 | H               | -7.10190  | 6.00368  | 3.17836  |
| H               | -5.86546  | 4.87214  | -1.67539 | H               | -8.01218  | 5.18085  | 4.45197  |
| C               | -7.70011  | 0.40616  | -1.72027 | O               | -8.09123  | 3.58262  | 0.16919  |
| C               | -8.29342  | 1.58019  | -2.19393 | C               | -10.88475 | 3.07812  | 1.80122  |
| C               | -7.71226  | 2.81420  | -1.91726 | H               | -11.76415 | 2.49876  | 1.50510  |
| C               | -6.54103  | 2.89397  | -1.15493 | H               | -11.21582 | 3.85065  | 2.50305  |
| C               | -5.95095  | 1.71760  | -0.69105 | H               | -10.47353 | 3.56417  | 0.91250  |
| C               | -6.52490  | 0.47566  | -0.97565 | C               | -7.97331  | -1.06001 | 1.30814  |
| H               | -8.15170  | -0.55704 | -1.93638 | H               | -7.30508  | -1.72402 | 1.85861  |
| H               | -9.20556  | 1.52895  | -2.78053 | H               | -8.84098  | -1.63253 | 0.96941  |
| H               | -8.17622  | 3.73020  | -2.27553 | H               | -7.43932  | -0.69772 | 0.42391  |
| H               | -5.04083  | 1.77363  | -0.09724 |                 |           |          |          |
| H               | -6.05904  | -0.43428 | -0.60867 | <b>clust-22</b> |           |          |          |
| C               | -9.48319  | 4.49293  | 1.03375  | C               | -9.35413  | 0.61510  | 4.69716  |
| H               | -9.52396  | 5.39709  | 1.65297  | C               | -7.89547  | 1.25271  | 2.19510  |
| H               | -9.34595  | 4.80189  | -0.00479 | C               | -7.26775  | 1.46099  | 3.57906  |
| H               | -10.44488 | 3.98314  | 1.11621  | C               | -8.32090  | 1.73771  | 4.64756  |
| O               | -6.83714  | 4.98202  | 0.07710  | H               | -8.84812  | -0.28789 | 5.07216  |
| C               | -10.50485 | 1.59073  | 2.23178  | H               | -7.17101  | 0.70064  | 1.58544  |

|   |           |          |          |
|---|-----------|----------|----------|
| H | -6.80510  | 0.49603  | 3.83216  |
| H | -8.81898  | 2.69623  | 4.46962  |
| H | -7.83511  | 1.81508  | 5.62692  |
| C | -9.84080  | 0.19454  | 3.31982  |
| O | -10.90142 | -0.36469 | 3.14609  |
| O | -9.03008  | 0.34988  | 2.25889  |
| C | -8.36084  | 2.44937  | 1.34234  |
| H | -8.89277  | 1.96850  | 0.51059  |
| C | -7.20848  | 3.20092  | 0.67777  |
| H | -6.41725  | 2.50326  | 0.36261  |
| H | -6.75733  | 3.94368  | 1.35172  |
| C | -6.80360  | 4.70761  | -1.09884 |
| H | -6.38444  | 5.43370  | -0.38611 |
| H | -7.37592  | 5.26124  | -1.84944 |
| C | -3.62717  | 2.51673  | -3.03443 |
| C | -3.33053  | 3.65057  | -2.28104 |
| C | -4.35537  | 4.35260  | -1.64304 |
| C | -5.68158  | 3.93635  | -1.76294 |
| C | -5.97243  | 2.79629  | -2.51982 |
| C | -4.95195  | 2.08867  | -3.14990 |
| H | -2.83204  | 1.96605  | -3.52721 |
| H | -2.30257  | 3.98542  | -2.18180 |
| H | -4.12056  | 5.23058  | -1.04591 |
| H | -7.00414  | 2.46431  | -2.60239 |
| H | -5.18777  | 1.20390  | -3.73332 |
| C | -9.33800  | 3.41134  | 2.01809  |
| H | -8.84238  | 4.02672  | 2.77598  |
| H | -9.75915  | 4.08375  | 1.26693  |
| H | -10.17011 | 2.87804  | 2.49029  |
| O | -7.74326  | 3.87177  | -0.45117 |
| C | -6.16291  | 2.51559  | 3.58071  |
| H | -5.61357  | 2.46863  | 4.52500  |
| H | -5.44607  | 2.35848  | 2.76831  |
| H | -6.57547  | 3.52495  | 3.48953  |
| C | -10.52972 | 0.93439  | 5.61668  |
| H | -11.22059 | 0.09318  | 5.68307  |
| H | -10.15916 | 1.16880  | 6.61836  |
| H | -11.08260 | 1.80271  | 5.24428  |

#### clust-23

|   |          |          |          |
|---|----------|----------|----------|
| C | -9.65096 | 0.46747  | 3.64751  |
| C | -7.13735 | 1.95114  | 3.24916  |
| C | -7.90452 | 2.01955  | 4.57259  |
| C | -9.39252 | 1.82547  | 4.29780  |
| H | -9.45939 | -0.30776 | 4.40499  |
| H | -6.06659 | 1.84694  | 3.45468  |
| H | -7.55937 | 1.16639  | 5.17369  |
| H | -9.76840 | 2.62692  | 3.64743  |
| H | -9.96207 | 1.88982  | 5.23135  |
| C | -8.65548 | 0.13132  | 2.54762  |
| O | -8.87517 | -0.71244 | 1.70706  |
| O | -7.44503 | 0.71886  | 2.54882  |
| C | -7.33291 | 3.17022  | 2.31444  |
| H | -8.26267 | 3.69000  | 2.58064  |
| C | -7.46505 | 2.75035  | 0.85231  |
| H | -8.32192 | 2.07836  | 0.70072  |
| H | -6.55942 | 2.21577  | 0.52738  |
| C | -7.68878 | 3.66683  | -1.30865 |
| H | -8.05255 | 4.59058  | -1.76973 |
| H | -8.41166 | 2.86876  | -1.53459 |
| C | -3.81839 | 2.69796  | -2.95867 |

|   |           |          |          |
|---|-----------|----------|----------|
| C | -4.95872  | 2.05000  | -3.42990 |
| C | -6.20826  | 2.34995  | -2.88476 |
| C | -6.33045  | 3.30619  | -1.87584 |
| C | -5.18241  | 3.95124  | -1.40524 |
| C | -3.93293  | 3.64758  | -1.94123 |
| H | -2.84480  | 2.46127  | -3.37634 |
| H | -4.87638  | 1.30318  | -4.21357 |
| H | -7.09426  | 1.83140  | -3.24323 |
| H | -5.27743  | 4.68356  | -0.60768 |
| H | -3.04701  | 4.15139  | -1.56663 |
| C | -6.16322  | 4.14825  | 2.46782  |
| H | -5.24038  | 3.68499  | 2.09838  |
| H | -6.34604  | 5.05400  | 1.88647  |
| H | -6.00450  | 4.43293  | 3.51059  |
| O | -7.65448  | 3.92365  | 0.08110  |
| C | -7.62398  | 3.29664  | 5.36143  |
| H | -8.13897  | 3.25179  | 6.32507  |
| H | -6.55484  | 3.42286  | 5.55699  |
| H | -7.98509  | 4.18463  | 4.83247  |
| C | -11.08459 | 0.31353  | 3.14466  |
| H | -11.25683 | -0.68484 | 2.74072  |
| H | -11.78331 | 0.48845  | 3.96725  |
| H | -11.29410 | 1.04386  | 2.35664  |

#### clust-24

|   |           |         |          |
|---|-----------|---------|----------|
| C | -8.92797  | 0.17822 | 4.19307  |
| C | -8.56154  | 3.04581 | 3.54328  |
| C | -9.93949  | 2.37091 | 3.51250  |
| C | -9.84107  | 0.88242 | 3.19215  |
| H | -9.40893  | 0.23306 | 5.18164  |
| H | -8.64769  | 3.93539 | 4.17734  |
| H | -10.32564 | 2.44155 | 4.53934  |
| H | -9.47338  | 0.71217 | 2.17419  |
| H | -10.83836 | 0.43086 | 3.24023  |
| C | -7.61010  | 0.90935 | 4.39062  |
| O | -6.60299  | 0.35165 | 4.76756  |
| O | -7.56443  | 2.24172 | 4.22131  |
| C | -7.94600  | 3.53623 | 2.22054  |
| H | -8.65738  | 4.25629 | 1.79634  |
| C | -7.73294  | 2.42629 | 1.19518  |
| H | -8.69243  | 2.02553 | 0.83835  |
| H | -7.15787  | 1.59545 | 1.64151  |
| C | -6.80537  | 1.99930 | -0.91454 |
| H | -7.76787  | 1.63614 | -1.30805 |
| H | -6.27530  | 1.12976 | -0.49291 |
| C | -4.44492  | 3.63442 | -4.13032 |
| C | -4.55989  | 4.33301 | -2.93019 |
| C | -5.32761  | 3.81755 | -1.88405 |
| C | -5.98900  | 2.59796 | -2.03342 |
| C | -5.87447  | 1.90211 | -3.24117 |
| C | -5.10565  | 2.41405 | -4.28326 |
| H | -3.84758  | 4.03694 | -4.94237 |
| H | -4.05078  | 5.28379 | -2.80445 |
| H | -5.42019  | 4.35935 | -0.94887 |
| H | -6.39248  | 0.95378 | -3.36639 |
| H | -5.02536  | 1.86390 | -5.21578 |
| C | -6.63053  | 4.27056 | 2.50177  |
| H | -5.86387  | 3.57037 | 2.84533  |
| H | -6.26860  | 4.76325 | 1.59833  |
| H | -6.77359  | 5.02785 | 3.27885  |
| O | -7.02301  | 2.95677 | 0.09545  |

|   |           |          |         |
|---|-----------|----------|---------|
| C | -10.91856 | 3.11017  | 2.60152 |
| H | -11.92449 | 2.70192  | 2.73111 |
| H | -10.95540 | 4.17851  | 2.83694 |
| H | -10.64810 | 3.00404  | 1.54622 |
| C | -8.68722  | -1.28782 | 3.84388 |
| H | -8.08050  | -1.78169 | 4.60367 |
| H | -9.64531  | -1.80822 | 3.76181 |
| H | -8.16753  | -1.37204 | 2.88411 |

#### clust-25

|   |           |          |          |
|---|-----------|----------|----------|
| C | -8.47446  | 0.35069  | 4.57734  |
| C | -8.73229  | 3.02490  | 3.36694  |
| C | -9.95613  | 2.24962  | 3.86294  |
| C | -9.68464  | 0.75373  | 3.73696  |
| H | -8.75682  | 0.44620  | 5.63691  |
| H | -8.81593  | 4.07266  | 3.67535  |
| H | -10.05689 | 2.48411  | 4.93209  |
| H | -9.51440  | 0.48349  | 2.68589  |
| H | -10.55753 | 0.18074  | 4.06808  |
| C | -7.30584  | 1.31441  | 4.44065  |
| O | -6.17193  | 1.01035  | 4.73808  |
| O | -7.53777  | 2.58526  | 4.06279  |
| C | -8.50921  | 2.98906  | 1.83519  |
| H | -9.02151  | 2.11595  | 1.41029  |
| C | -7.02980  | 2.84470  | 1.48334  |
| H | -6.61417  | 1.90867  | 1.88360  |
| H | -6.44909  | 3.67659  | 1.91312  |
| C | -5.58086  | 2.70157  | -0.35414 |
| H | -5.17469  | 1.73730  | -0.01120 |
| H | -4.95836  | 3.49419  | 0.09187  |
| C | -5.28488  | 2.96904  | -4.64737 |
| C | -6.45880  | 3.36168  | -4.00739 |
| C | -6.56949  | 3.27148  | -2.61857 |
| C | -5.50520  | 2.78357  | -1.85895 |
| C | -4.33087  | 2.38577  | -2.50600 |
| C | -4.21823  | 2.47999  | -3.89087 |
| H | -5.20071  | 3.03968  | -5.72727 |
| H | -7.29384  | 3.74008  | -4.58931 |
| H | -7.48268  | 3.57416  | -2.11728 |
| H | -3.50034  | 1.99768  | -1.92052 |
| H | -3.30111  | 2.16706  | -4.38044 |
| C | -9.07805  | 4.25452  | 1.18488  |
| H | -8.50648  | 5.13147  | 1.51069  |
| H | -9.00778  | 4.18801  | 0.09762  |
| H | -10.12455 | 4.41448  | 1.45394  |
| O | -6.91471  | 2.84857  | 0.07474  |
| C | -11.25014 | 2.66193  | 3.16499  |
| H | -12.09341 | 2.13169  | 3.61611  |
| H | -11.43688 | 3.73560  | 3.26249  |
| H | -11.23073 | 2.41012  | 2.09967  |
| C | -8.02480  | -1.08575 | 4.32029  |
| H | -7.20192  | -1.36623 | 4.97881  |
| H | -8.86201  | -1.76836 | 4.48926  |
| H | -7.69135  | -1.20315 | 3.28435  |

#### clust-26

|   |          |          |         |
|---|----------|----------|---------|
| C | -8.37165 | -0.08217 | 4.25583 |
| C | -8.37557 | 1.68127  | 2.25087 |
| C | -7.63404 | 2.27557  | 3.45720 |
| C | -7.65658 | 1.23576  | 4.61086 |
| H | -7.78919 | -0.60394 | 3.48459 |

|   |           |          |          |
|---|-----------|----------|----------|
| H | -7.78932  | 0.82310  | 1.90492  |
| H | -6.59799  | 2.41479  | 3.12546  |
| H | -8.17882  | 1.66670  | 5.47405  |
| H | -6.64155  | 1.00342  | 4.94602  |
| C | -9.70944  | 0.26304  | 3.63441  |
| O | -10.77563 | -0.20205 | 3.96857  |
| O | -9.67174  | 1.18875  | 2.65794  |
| C | -8.61571  | 2.55162  | 1.00933  |
| H | -8.93509  | 1.84712  | 0.22977  |
| C | -7.31150  | 3.17775  | 0.53604  |
| H | -6.94258  | 3.91374  | 1.27005  |
| H | -7.48221  | 3.71020  | -0.41047 |
| C | -5.07706  | 2.64959  | -0.02575 |
| H | -4.39731  | 1.79444  | 0.04045  |
| H | -4.73124  | 3.41415  | 0.68651  |
| C | -5.00772  | 4.21274  | -4.04884 |
| C | -4.31050  | 4.86747  | -3.03541 |
| C | -4.34642  | 4.37223  | -1.73059 |
| C | -5.06614  | 3.21502  | -1.43117 |
| C | -5.76485  | 2.56301  | -2.45238 |
| C | -5.73875  | 3.06002  | -3.75318 |
| H | -4.98657  | 4.59935  | -5.06290 |
| H | -3.74606  | 5.76814  | -3.25631 |
| H | -3.81180  | 4.89215  | -0.93911 |
| H | -6.33663  | 1.66954  | -2.21573 |
| H | -6.28729  | 2.54859  | -4.53825 |
| C | -9.71057  | 3.61714  | 1.13042  |
| H | -9.38388  | 4.49472  | 1.69224  |
| H | -9.99934  | 3.95410  | 0.13069  |
| H | -10.59706 | 3.20729  | 1.61856  |
| O | -6.34398  | 2.15675  | 0.36502  |
| C | -8.17678  | 3.61818  | 3.95383  |
| H | -7.69469  | 3.87993  | 4.90062  |
| H | -7.98437  | 4.43176  | 3.25183  |
| H | -9.25670  | 3.56116  | 4.13059  |
| C | -8.53547  | -0.99888 | 5.46003  |
| H | -9.03230  | -1.93037 | 5.18166  |
| H | -7.55513  | -1.23660 | 5.88172  |
| H | -9.13767  | -0.51338 | 6.23322  |

#### clust-27

|   |           |          |          |
|---|-----------|----------|----------|
| C | -9.73488  | 0.54941  | 4.77067  |
| C | -7.55417  | 2.04862  | 3.43330  |
| C | -8.70590  | 2.75945  | 4.15505  |
| C | -9.98234  | 1.92398  | 4.15422  |
| H | -9.54112  | 0.69546  | 5.84449  |
| H | -6.61838  | 2.49838  | 3.78491  |
| H | -8.38032  | 2.84017  | 5.20235  |
| H | -10.37895 | 1.81322  | 3.13991  |
| H | -10.75490 | 2.43875  | 4.73677  |
| C | -8.45631  | -0.10610 | 4.27397  |
| O | -8.27713  | -1.30321 | 4.32176  |
| O | -7.43696  | 0.66663  | 3.85968  |
| C | -7.47319  | 2.01829  | 1.89402  |
| H | -6.65606  | 1.31014  | 1.70319  |
| C | -6.99124  | 3.33566  | 1.28882  |
| H | -6.20142  | 3.78670  | 1.91180  |
| H | -7.80646  | 4.06676  | 1.19180  |
| C | -6.03724  | 4.19647  | -0.67563 |
| H | -5.23532  | 4.69041  | -0.10423 |
| H | -6.86645  | 4.91711  | -0.76341 |

|   |           |          |          |
|---|-----------|----------|----------|
| C | -4.60498  | 3.23832  | -4.62795 |
| C | -5.20811  | 2.25078  | -3.85239 |
| C | -5.67185  | 2.54558  | -2.56843 |
| C | -5.53362  | 3.83397  | -2.05148 |
| C | -4.92431  | 4.82183  | -2.83222 |
| C | -4.46392  | 4.52864  | -4.11292 |
| H | -4.24474  | 3.00666  | -5.62534 |
| H | -5.31908  | 1.24442  | -4.24466 |
| H | -6.13962  | 1.77798  | -1.96159 |
| H | -4.80903  | 5.82720  | -2.43296 |
| H | -3.99243  | 5.30462  | -4.70808 |
| C | -8.71376  | 1.49643  | 1.16906  |
| H | -9.53556  | 2.21909  | 1.19997  |
| H | -8.46929  | 1.31616  | 0.11942  |
| H | -9.06392  | 0.55039  | 1.59590  |
| O | -6.47583  | 3.04408  | 0.00398  |
| C | -8.95134  | 4.17553  | 3.63822  |
| H | -9.62329  | 4.70315  | 4.32061  |
| H | -8.02347  | 4.75261  | 3.56997  |
| H | -9.42628  | 4.16343  | 2.65255  |
| C | -10.92603 | -0.39184 | 4.61235  |
| H | -10.74920 | -1.34251 | 5.11660  |
| H | -11.82042 | 0.07322  | 5.03588  |
| H | -11.11499 | -0.59569 | 3.55345  |

#### clust-28

|   |           |          |          |
|---|-----------|----------|----------|
| C | -8.48241  | 0.56626  | 5.29376  |
| C | -8.19127  | 2.12115  | 3.13166  |
| C | -9.44373  | 2.53711  | 3.91597  |
| C | -9.56820  | 1.65536  | 5.18612  |
| H | -7.51632  | 1.05471  | 5.48125  |
| H | -7.30102  | 2.33525  | 3.74208  |
| H | -9.28922  | 3.57732  | 4.22170  |
| H | -10.54305 | 1.15305  | 5.18588  |
| H | -9.53308  | 2.26731  | 6.09184  |
| C | -8.35843  | -0.12329 | 3.95195  |
| O | -8.38461  | -1.31949 | 3.77444  |
| O | -8.22979  | 0.69622  | 2.89013  |
| C | -8.00261  | 2.78836  | 1.77148  |
| H | -8.82671  | 2.47860  | 1.11679  |
| C | -6.70533  | 2.29778  | 1.13435  |
| H | -6.70750  | 1.20314  | 1.04946  |
| H | -5.84382  | 2.59391  | 1.75852  |
| C | -5.43436  | 2.45532  | -0.83180 |
| H | -5.46451  | 1.36456  | -0.98131 |
| H | -4.53849  | 2.67725  | -0.22928 |
| C | -5.07053  | 4.42358  | -4.65155 |
| C | -6.09177  | 4.79028  | -3.77810 |
| C | -6.22290  | 4.15821  | -2.53968 |
| C | -5.33143  | 3.15187  | -2.16696 |
| C | -4.30885  | 2.78497  | -3.04818 |
| C | -4.17666  | 3.41626  | -4.28199 |
| H | -4.97054  | 4.91569  | -5.61389 |
| H | -6.79221  | 5.57105  | -4.05891 |
| H | -7.01809  | 4.44024  | -1.85820 |
| H | -3.61266  | 1.99824  | -2.76564 |
| H | -3.37891  | 3.12116  | -4.95669 |
| C | -7.99166  | 4.31254  | 1.90397  |
| H | -7.22956  | 4.63115  | 2.62569  |
| H | -7.75318  | 4.76521  | 0.93966  |
| H | -8.95767  | 4.70211  | 2.23501  |

|   |           |          |          |
|---|-----------|----------|----------|
| O | -6.58793  | 2.88203  | -0.14727 |
| C | -10.71564 | 2.45308  | 3.06839  |
| H | -11.58770 | 2.69466  | 3.68249  |
| H | -10.69877 | 3.14716  | 2.22393  |
| H | -10.85066 | 1.43929  | 2.67554  |
| C | -8.76258  | -0.42911 | 6.41062  |
| H | -7.96825  | -1.17461 | 6.48317  |
| H | -8.83925  | 0.09660  | 7.36620  |
| H | -9.70338  | -0.95552 | 6.22709  |

#### LACTONE 3

##### 3a

|   |          |          |          |
|---|----------|----------|----------|
| C | -2.31191 | -1.73094 | 0.01001  |
| C | -0.77887 | -1.69350 | -0.04066 |
| C | -2.40332 | 0.78347  | -0.16802 |
| C | -2.94307 | -0.54096 | -0.71021 |
| H | -0.41015 | -2.29155 | 0.80100  |
| H | -2.76378 | -0.60620 | -1.78649 |
| H | -2.57609 | -1.64623 | 1.07266  |
| H | -2.60003 | 1.58959  | -0.88084 |
| H | -4.03038 | -0.56818 | -0.57196 |
| C | -2.86320 | -3.06473 | -0.49220 |
| H | -2.38160 | -3.91199 | 0.00652  |
| H | -3.93679 | -3.12179 | -0.29250 |
| H | -2.71702 | -3.17625 | -1.57145 |
| C | -3.04517 | 1.17771  | 1.17487  |
| H | -2.65155 | 2.13500  | 1.52304  |
| H | -4.12694 | 1.27081  | 1.04678  |
| H | -2.85548 | 0.42756  | 1.94823  |
| C | -0.89791 | 0.78397  | 0.02751  |
| O | -0.24930 | -0.37152 | 0.23465  |
| O | -0.26222 | 1.81520  | 0.08774  |
| C | -0.06917 | -2.23035 | -1.29514 |
| H | -0.38555 | -3.27658 | -1.39398 |
| C | 1.44681  | -2.22041 | -1.06996 |
| H | 1.95413  | -2.73501 | -1.89086 |
| H | 1.82264  | -1.19426 | -1.02400 |
| H | 1.71581  | -2.72227 | -0.13484 |
| C | -0.41181 | -1.48928 | -2.59036 |
| H | -0.29218 | -0.40593 | -2.46860 |
| H | 0.27026  | -1.80285 | -3.38620 |
| H | -1.42904 | -1.69046 | -2.93408 |

##### 3b

|   |          |          |          |
|---|----------|----------|----------|
| C | -2.42776 | -1.75955 | 0.05965  |
| C | -0.89703 | -1.84509 | 0.11072  |
| C | -2.31290 | 0.74965  | -0.20345 |
| C | -2.90880 | -0.55196 | -0.74254 |
| H | -0.63305 | -2.48373 | 0.96151  |
| H | -2.65914 | -0.67690 | -1.79910 |
| H | -2.73734 | -1.60423 | 1.10271  |
| H | -2.34073 | 1.52591  | -0.97417 |
| H | -4.00224 | -0.49375 | -0.68564 |
| C | -3.09052 | -3.04926 | -0.42107 |
| H | -2.70172 | -3.92793 | 0.10250  |
| H | -4.16736 | -2.99526 | -0.23761 |
| H | -2.94486 | -3.19561 | -1.49555 |
| C | -3.08068 | 1.27904  | 1.02187  |
| H | -2.63301 | 2.20565  | 1.38682  |
| H | -4.11844 | 1.47777  | 0.74174  |
| H | -3.08046 | 0.55113  | 1.83890  |



|           |          |          |          |           |          |          |          |
|-----------|----------|----------|----------|-----------|----------|----------|----------|
| C         | -0.10465 | -3.88461 | -1.23785 | H         | 2.40506  | -0.06571 | -2.97542 |
| H         | -1.03549 | -4.23874 | -1.68638 | C         | 2.54025  | 0.35509  | -0.23448 |
| H         | 0.71418  | -4.20121 | -1.89058 | O         | 1.30924  | -0.01184 | 0.15281  |
| H         | 0.02392  | -4.38827 | -0.27415 | O         | 2.91730  | 1.47360  | 0.04345  |
| C         | -0.85062 | 0.63648  | 0.19280  | C         | 0.82819  | -1.37976 | 0.14902  |
| O         | -0.31818 | -0.56136 | 0.47510  | H         | -0.25224 | -1.24917 | 0.01948  |
| O         | -0.15780 | 1.62030  | 0.34655  | C         | 1.36745  | -1.02899 | 2.63186  |
| C         | -0.07082 | -2.35956 | -1.08526 | H         | 1.47253  | -1.55111 | 3.58756  |
| H         | 0.95515  | -2.09939 | -0.79422 | H         | 2.28752  | -0.46911 | 2.44727  |
| C         | -0.34768 | -1.66666 | -2.42043 | H         | 0.55092  | -0.30559 | 2.72437  |
| H         | -0.34964 | -0.57525 | -2.32563 | C         | -0.14906 | -2.88635 | 1.92397  |
| H         | 0.43421  | -1.93079 | -3.13871 | H         | -1.01117 | -2.23274 | 2.10018  |
| H         | -1.30509 | -1.98135 | -2.84818 | H         | -0.42911 | -3.61272 | 1.15759  |
| <b>3c</b> |          |          |          | H         | 0.05201  | -3.43433 | 2.84906  |
| C         | -2.05601 | -1.25167 | -0.04720 | C         | 1.07088  | -2.04653 | 1.52660  |
| C         | -0.68313 | -1.03288 | 0.58989  | H         | 1.93684  | -2.71666 | 1.44640  |
| C         | -0.13667 | 0.36004  | 0.27025  | <b>3e</b> |          |          |          |
| H         | 0.79412  | 0.50231  | 0.83382  | C         | -0.46655 | -3.82301 | -0.22306 |
| H         | -0.76816 | -1.15049 | 1.67841  | C         | -2.55006 | -2.80571 | 0.78043  |
| H         | 0.00325  | -1.81031 | 0.23720  | C         | -3.08836 | -4.21324 | 1.02680  |
| H         | -1.92555 | -1.34133 | -1.13530 | H         | -2.89236 | -2.18393 | 1.61556  |
| C         | 0.17345  | 0.53374  | -1.21854 | H         | -2.76058 | -4.54254 | 2.02506  |
| H         | 0.73089  | 1.45551  | -1.40326 | H         | -0.57701 | -3.33529 | -1.20242 |
| H         | 0.78648  | -0.30289 | -1.56823 | C         | 1.01485  | -4.13568 | -0.01443 |
| H         | -0.73411 | 0.56306  | -1.82980 | H         | 1.40261  | -4.75976 | -0.82059 |
| C         | -2.73469 | -2.52613 | 0.45407  | H         | 1.58577  | -3.20364 | 0.01725  |
| H         | -2.92287 | -2.46365 | 1.53044  | H         | 1.16692  | -4.66176 | 0.93319  |
| H         | -3.68651 | -2.69037 | -0.05248 | C         | -3.05014 | -2.19437 | -0.53189 |
| H         | -2.08338 | -3.38505 | 0.27063  | H         | -4.11712 | -1.96096 | -0.48190 |
| C         | -2.98878 | -0.05577 | 0.10088  | H         | -2.51324 | -1.26517 | -0.74590 |
| O         | -4.18285 | -0.14158 | -0.08620 | H         | -2.90281 | -2.87249 | -1.37883 |
| O         | -2.47567 | 1.15683  | 0.36495  | C         | -4.60545 | -4.37999 | 0.94038  |
| C         | -1.12705 | 1.36690  | 0.85246  | H         | -4.90247 | -4.15998 | -0.09370 |
| H         | -1.16859 | 1.17811  | 1.93449  | C         | -5.30951 | -3.40219 | 1.88447  |
| C         | -1.37305 | 3.67937  | 1.81121  | H         | -5.15661 | -2.35787 | 1.59854  |
| H         | -1.15877 | 4.74346  | 1.67487  | H         | -6.38616 | -3.59329 | 1.88496  |
| H         | -2.46067 | 3.55813  | 1.86417  | H         | -4.94843 | -3.53027 | 2.91218  |
| H         | -0.94651 | 3.36597  | 2.76901  | C         | -5.01038 | -5.81936 | 1.26747  |
| C         | -0.80767 | 2.85714  | 0.64856  | H         | -6.09367 | -5.93920 | 1.17428  |
| H         | 0.28829  | 2.93713  | 0.66813  | H         | -4.52483 | -6.53383 | 0.59995  |
| C         | -1.32313 | 3.42711  | -0.67755 | H         | -4.73229 | -6.06760 | 2.29900  |
| H         | -0.96453 | 4.45397  | -0.79501 | C         | -1.26935 | -5.10789 | -0.37788 |
| H         | -0.99670 | 2.85433  | -1.54694 | O         | -0.83844 | -6.06936 | -0.97613 |
| H         | -2.41625 | 3.44591  | -0.67953 | O         | -2.53105 | -5.16257 | 0.08086  |
| <b>3d</b> |          |          |          | C         | -1.02430 | -2.88674 | 0.84835  |
| C         | 1.39488  | -2.13187 | -1.05975 | H         | -0.57766 | -1.89417 | 0.72479  |
| C         | 2.91919  | -2.03801 | -1.04347 | H         | -0.72475 | -3.25148 | 1.83998  |
| C         | 3.38444  | -0.58039 | -1.08536 | <b>3f</b> |          |          |          |
| H         | 4.39925  | -0.49474 | -0.68494 | C         | -0.45129 | -3.77525 | -0.23022 |
| H         | 3.30854  | -2.53481 | -0.14702 | C         | -2.53134 | -2.76628 | 0.78253  |
| H         | 3.33693  | -2.57519 | -1.90256 | C         | -3.09790 | -4.17724 | 0.93936  |
| H         | 1.02473  | -1.60503 | -1.94979 | H         | -2.88337 | -2.19187 | 1.64760  |
| C         | 0.92011  | -3.58058 | -1.14528 | H         | -2.76342 | -4.54397 | 1.92049  |
| H         | 1.29804  | -4.17664 | -0.30806 | H         | -0.53728 | -3.22284 | -1.17731 |
| H         | -0.17196 | -3.64842 | -1.15248 | C         | 1.02019  | -4.13035 | -0.02008 |
| H         | 1.29158  | -4.03299 | -2.06908 | H         | 1.40665  | -4.71458 | -0.85610 |
| C         | 3.39769  | -0.01575 | -2.51753 | H         | 1.60941  | -3.21411 | 0.07405  |
| H         | 3.72513  | 1.02574  | -2.51845 | H         | 1.14745  | -4.71416 | 0.89691  |
| H         | 4.08689  | -0.60082 | -3.13198 | C         | -2.94827 | -2.03643 | -0.49919 |

|   |          |          |          |
|---|----------|----------|----------|
| H | -3.96897 | -1.65509 | -0.42828 |
| H | -2.28713 | -1.18146 | -0.67391 |
| H | -2.89736 | -2.68791 | -1.37771 |
| C | -5.31177 | -3.46726 | 1.89885  |
| H | -5.25912 | -2.41995 | 1.58094  |
| H | -6.36876 | -3.73372 | 1.98529  |
| H | -4.86179 | -3.54397 | 2.89452  |
| C | -1.27480 | -5.03261 | -0.47825 |
| O | -0.85126 | -5.96462 | -1.12629 |
| O | -2.54344 | -5.09123 | -0.04023 |
| C | -4.61788 | -4.38481 | 0.89078  |
| H | -4.76307 | -5.42150 | 1.22239  |
| C | -5.25343 | -4.27287 | -0.49853 |
| H | -6.26288 | -4.69389 | -0.46559 |
| H | -5.34343 | -3.23591 | -0.83010 |
| H | -4.67955 | -4.82854 | -1.24442 |
| C | -1.00973 | -2.89980 | 0.89128  |
| H | -0.53154 | -1.91525 | 0.84861  |
| H | -0.74785 | -3.34198 | 1.86170  |

#### LACTONE 4

##### 4a

|   |          |          |          |
|---|----------|----------|----------|
| C | -1.96932 | -1.39870 | -0.15015 |
| C | -0.47192 | -1.27859 | 0.15540  |
| C | 0.02404  | 0.15254  | -0.04536 |
| H | 1.06422  | 0.22371  | 0.28878  |
| H | -0.28297 | -1.59827 | 1.18771  |
| H | 0.07828  | -1.97152 | -0.49037 |
| H | -2.09465 | -1.42259 | -1.24244 |
| C | -0.02985 | 0.59515  | -1.51039 |
| H | 0.40198  | 1.59354  | -1.62704 |
| H | 0.53734  | -0.09679 | -2.14005 |
| H | -1.05565 | 0.63399  | -1.88915 |
| C | -2.57484 | -2.68076 | 0.42149  |
| H | -2.51926 | -2.67620 | 1.51494  |
| H | -3.62033 | -2.78774 | 0.12991  |
| H | -2.01457 | -3.54579 | 0.05603  |
| C | -2.80796 | -0.18707 | 0.24857  |
| O | -4.01866 | -0.22944 | 0.26784  |
| O | -2.21042 | 0.99598  | 0.47653  |
| C | -0.80908 | 1.07771  | 0.83955  |
| H | -0.55053 | 2.12168  | 0.62180  |
| C | -0.69798 | 0.85548  | 2.35534  |
| H | -1.14965 | -0.12057 | 2.58535  |
| C | -1.48883 | 1.93223  | 3.10250  |
| H | -1.47359 | 1.73921  | 4.17891  |
| H | -1.04193 | 2.91875  | 2.93091  |
| H | -2.52941 | 1.96576  | 2.77211  |
| C | 0.76060  | 0.84333  | 2.81727  |
| H | 1.28174  | 1.74578  | 2.47501  |
| H | 0.80670  | 0.82758  | 3.90973  |
| H | 1.30903  | -0.02772 | 2.44834  |

##### 4b

|   |          |          |          |
|---|----------|----------|----------|
| C | -2.49070 | -1.08680 | -0.29423 |
| C | -1.05676 | -1.61611 | -0.14351 |
| C | -0.09443 | -0.47543 | 0.21812  |
| H | 0.75827  | -0.89648 | 0.76139  |
| H | -1.05229 | -2.39328 | 0.63017  |
| H | -0.73751 | -2.09199 | -1.07693 |
| H | -2.47236 | -0.20095 | -0.94634 |

|   |          |          |          |
|---|----------|----------|----------|
| C | 0.42799  | 0.19884  | -1.05579 |
| H | 1.03966  | 1.07726  | -0.83688 |
| H | 1.03677  | -0.50278 | -1.63287 |
| H | -0.40410 | 0.52482  | -1.69084 |
| C | -3.46462 | -2.11128 | -0.85921 |
| H | -3.48726 | -3.00531 | -0.22908 |
| H | -4.47788 | -1.70794 | -0.90690 |
| H | -3.15343 | -2.40356 | -1.86544 |
| C | -2.91218 | -0.62187 | 1.08181  |
| O | -3.97343 | -0.87287 | 1.60705  |
| O | -1.98330 | 0.05672  | 1.77753  |
| C | -0.79705 | 0.56738  | 1.12174  |
| H | -1.12901 | 1.40606  | 0.49224  |
| C | 0.05834  | 1.12946  | 2.26468  |
| H | -0.58005 | 1.86561  | 2.76952  |
| C | 0.43998  | 0.05914  | 3.28990  |
| H | -0.44077 | -0.47528 | 3.65363  |
| H | 1.14012  | -0.67039 | 2.86879  |
| H | 0.93362  | 0.52754  | 4.14647  |
| C | 1.29905  | 1.85499  | 1.74324  |
| H | 1.04269  | 2.62746  | 1.01084  |
| H | 1.82066  | 2.33849  | 2.57394  |
| H | 2.00173  | 1.15604  | 1.27585  |

##### 4c

|   |          |          |          |
|---|----------|----------|----------|
| C | -2.28855 | -1.69180 | -0.30191 |
| C | -2.36116 | 0.80255  | 0.08915  |
| C | -2.69182 | -0.33317 | -0.87257 |
| H | -2.16318 | -0.17482 | -1.82202 |
| H | -2.88169 | -1.88017 | 0.60189  |
| H | -2.48517 | 1.76510  | -0.41748 |
| H | -3.76382 | -0.32931 | -1.09920 |
| C | -2.60264 | -2.78833 | -1.32510 |
| H | -2.32832 | -3.78476 | -0.97513 |
| H | -3.67341 | -2.79343 | -1.54940 |
| H | -2.06339 | -2.59762 | -2.25961 |
| C | -3.23688 | 0.82489  | 1.35088  |
| H | -2.96983 | 1.67507  | 1.98258  |
| H | -4.28807 | 0.91942  | 1.06496  |
| H | -3.12525 | -0.08684 | 1.94370  |
| C | -0.89763 | 0.76055  | 0.47663  |
| O | -0.21621 | -0.37915 | 0.30067  |
| O | -0.30819 | 1.72695  | 0.91205  |
| C | -0.79395 | -1.69457 | 0.06661  |
| H | -0.22897 | -2.06469 | -0.79808 |
| C | -0.40110 | -2.52803 | 1.29859  |
| H | 0.69006  | -2.43394 | 1.36622  |
| C | -0.73861 | -4.01025 | 1.13352  |
| H | -0.30216 | -4.58124 | 1.95789  |
| H | -1.82116 | -4.17640 | 1.15622  |
| H | -0.34542 | -4.41709 | 0.19624  |
| C | -0.99578 | -1.97958 | 2.59705  |
| H | -2.08184 | -2.12030 | 2.63390  |
| H | -0.57154 | -2.51343 | 3.45241  |
| H | -0.77502 | -0.91586 | 2.72830  |

##### 4d

|   |          |          |          |
|---|----------|----------|----------|
| C | -0.36877 | -4.03034 | -0.54898 |
| C | -1.89698 | -2.88623 | 1.12769  |
| H | -1.75594 | -2.46490 | 2.12839  |
| H | -1.26138 | -4.14208 | -1.18202 |

|   |          |          |          |
|---|----------|----------|----------|
| C | 0.86875  | -3.93667 | -1.42979 |
| H | 0.99272  | -4.83783 | -2.03332 |
| H | 0.78516  | -3.07479 | -2.09688 |
| H | 1.76657  | -3.81573 | -0.81667 |
| C | -2.99139 | -2.08982 | 0.41200  |
| H | -3.96738 | -2.21659 | 0.89034  |
| H | -2.75158 | -1.02329 | 0.41303  |
| H | -3.08312 | -2.41518 | -0.63116 |
| C | -0.30729 | -5.23421 | 0.36747  |
| O | 0.53815  | -6.09904 | 0.32688  |
| O | -1.24129 | -5.27303 | 1.33525  |
| C | -0.56370 | -2.80651 | 0.36160  |
| H | -0.52774 | -1.89379 | -0.24259 |
| H | 0.28228  | -2.76028 | 1.05709  |
| C | -2.35252 | -4.35208 | 1.26772  |
| H | -2.93012 | -4.61901 | 0.36994  |
| C | -3.22072 | -4.63383 | 2.49738  |
| H | -3.98932 | -3.84935 | 2.50909  |
| C | -3.91581 | -5.99114 | 2.36979  |
| H | -4.56403 | -6.17459 | 3.23156  |
| H | -4.53036 | -6.04112 | 1.46529  |
| H | -3.17445 | -6.79542 | 2.32581  |
| C | -2.42446 | -4.56070 | 3.80301  |
| H | -1.67456 | -5.35602 | 3.83495  |
| H | -1.91105 | -3.60323 | 3.92834  |
| H | -3.09696 | -4.69146 | 4.65552  |

#### 4e

|   |          |          |          |
|---|----------|----------|----------|
| C | 1.47609  | -2.39603 | -0.85387 |
| C | 2.95377  | -2.08599 | -1.08089 |
| C | 3.18261  | -0.58787 | -1.26055 |
| H | 4.25509  | -0.37630 | -1.30614 |
| H | 3.53874  | -2.44337 | -0.22348 |
| H | 3.31222  | -2.62856 | -1.96265 |
| H | 0.93649  | -2.15204 | -1.77829 |
| C | 1.28446  | -3.88637 | -0.56223 |
| H | 1.85801  | -4.17375 | 0.32577  |
| H | 0.23712  | -4.14131 | -0.38302 |
| H | 1.64006  | -4.48726 | -1.40449 |
| C | 2.53179  | -0.00186 | -2.52306 |
| H | 2.79073  | 1.05419  | -2.62750 |
| H | 2.89289  | -0.53751 | -3.40555 |
| H | 1.44135  | -0.08195 | -2.50028 |
| C | 2.69053  | 0.14860  | -0.03385 |
| O | 1.73834  | -0.43051 | 0.71178  |
| O | 3.14340  | 1.21377  | 0.32675  |
| C | 0.89149  | -1.53207 | 0.28451  |
| H | 0.81650  | -2.14261 | 1.19423  |
| C | -1.01119 | -0.11204 | 1.15161  |
| H | -0.32673 | 0.69784  | 1.40932  |
| H | -1.98643 | 0.31987  | 0.90885  |
| H | -1.13691 | -0.74897 | 2.03560  |
| C | -1.50286 | -2.02929 | -0.38703 |
| H | -1.22148 | -2.58747 | -1.28395 |
| H | -1.61616 | -2.74053 | 0.43993  |
| H | -2.48137 | -1.57695 | -0.57068 |
| C | -0.49085 | -0.93932 | -0.02522 |
| H | -0.36461 | -0.27650 | -0.89482 |

#### 4f

|   |         |          |          |
|---|---------|----------|----------|
| C | 1.36341 | -2.14123 | -1.13731 |
|---|---------|----------|----------|

|   |          |          |          |
|---|----------|----------|----------|
| C | 2.87910  | -2.07786 | -0.95715 |
| C | 3.39116  | -0.64139 | -1.08613 |
| H | 4.35895  | -0.53883 | -0.58529 |
| H | 3.13169  | -2.48606 | 0.03034  |
| H | 3.38122  | -2.70784 | -1.69994 |
| H | 1.10153  | -1.69915 | -2.10796 |
| C | 0.85294  | -3.58024 | -1.09244 |
| H | 0.99554  | -4.01212 | -0.09482 |
| H | -0.20904 | -3.64634 | -1.34349 |
| H | 1.40557  | -4.19665 | -1.80697 |
| C | 3.57798  | -0.22104 | -2.55464 |
| H | 3.93851  | 0.80738  | -2.61817 |
| H | 4.30867  | -0.87954 | -3.03140 |
| H | 2.63896  | -0.29231 | -3.11226 |
| C | 2.49161  | 0.39099  | -0.42163 |
| O | 1.23875  | 0.06733  | -0.06987 |
| O | 2.85612  | 1.53512  | -0.25467 |
| C | 0.73780  | -1.29303 | -0.03580 |
| H | 1.04253  | -1.71001 | 0.93669  |
| C | -1.32555 | -0.67943 | -1.39150 |
| H | -1.12311 | -1.37842 | -2.20863 |
| H | -2.40894 | -0.53997 | -1.33471 |
| H | -0.87406 | 0.28613  | -1.64328 |
| C | -1.28244 | -0.31056 | 1.10368  |
| H | -2.37331 | -0.35194 | 1.17049  |
| H | -0.86930 | -0.64596 | 2.06078  |
| H | -0.98700 | 0.73132  | 0.95291  |
| C | -0.78922 | -1.18580 | -0.05127 |
| H | -1.16079 | -2.20444 | 0.11810  |

#### 4g

|   |          |          |          |
|---|----------|----------|----------|
| C | 1.39651  | -2.17161 | -1.18977 |
| C | 2.91729  | -2.09052 | -1.05171 |
| C | 3.40524  | -0.64181 | -1.05373 |
| H | 4.39470  | -0.57495 | -0.59076 |
| H | 3.21119  | -2.59101 | -0.11938 |
| H | 3.40186  | -2.63442 | -1.87020 |
| H | 1.09153  | -1.63474 | -2.09819 |
| C | 0.94375  | -3.62748 | -1.30206 |
| H | 1.05850  | -4.15102 | -0.34580 |
| H | -0.09832 | -3.71313 | -1.61572 |
| H | 1.55649  | -4.14709 | -2.04438 |
| C | 3.51324  | -0.06395 | -2.47594 |
| H | 3.86215  | 0.97006  | -2.44558 |
| H | 4.22380  | -0.65727 | -3.05730 |
| H | 2.54766  | -0.08647 | -2.99068 |
| C | 2.52191  | 0.29122  | -0.24211 |
| O | 1.28624  | -0.09255 | 0.11025  |
| O | 2.87719  | 1.41405  | 0.04605  |
| C | 0.78961  | -1.45791 | 0.01571  |
| H | 1.12655  | -1.97009 | 0.92952  |
| C | -0.73754 | -1.30213 | 0.07859  |
| H | -0.88963 | -0.48882 | 0.79892  |
| C | -1.33750 | -0.86136 | -1.25687 |
| H | -1.28894 | -1.66447 | -2.00077 |
| H | -2.39012 | -0.59389 | -1.12758 |
| H | -0.81355 | 0.01224  | -1.65748 |
| C | -1.45148 | -2.53254 | 0.64682  |
| H | -2.49347 | -2.28002 | 0.86396  |
| H | -1.45815 | -3.37364 | -0.05007 |
| H | -0.98729 | -2.86722 | 1.58018  |

**LACTONE 5****5a**

|   |          |          |          |
|---|----------|----------|----------|
| C | -0.39034 | -1.81202 | -0.02686 |
| C | 0.08561  | -0.38821 | -0.30047 |
| C | -0.49576 | 0.56175  | 0.74857  |
| H | 1.17978  | -0.35396 | -0.27400 |
| H | 0.10963  | -2.13230 | 0.89733  |
| H | -0.30321 | 0.13431  | 1.74450  |
| H | -0.22390 | -0.06079 | -1.30239 |
| C | -1.99900 | 0.57952  | 0.55800  |
| C | 0.07938  | 1.97203  | 0.68942  |
| H | -0.38463 | 2.61915  | 1.43551  |
| H | 1.15683  | 1.93937  | 0.87056  |
| H | -0.09279 | 2.41463  | -0.29624 |
| C | 0.00574  | -2.77056 | -1.14911 |
| H | 1.09074  | -2.77401 | -1.28993 |
| H | -0.31200 | -3.79494 | -0.93165 |
| H | -0.46001 | -2.46548 | -2.09248 |
| O | -2.57011 | -0.56388 | 0.14328  |
| O | -2.69354 | 1.56300  | 0.68578  |
| C | -1.91727 | -1.85466 | 0.23447  |
| H | -2.40738 | -2.41787 | -0.56951 |
| C | -2.29271 | -2.50509 | 1.57243  |
| H | -1.77473 | -1.94663 | 2.36755  |
| C | -1.81739 | -3.96056 | 1.60559  |
| H | -0.73374 | -4.05577 | 1.49398  |
| H | -2.09600 | -4.42425 | 2.55581  |
| H | -2.29445 | -4.53450 | 0.80194  |
| C | -3.79996 | -2.43803 | 1.82221  |
| H | -4.34074 | -2.96179 | 1.02483  |
| H | -4.04740 | -2.92359 | 2.77073  |
| H | -4.16049 | -1.40819 | 1.85530  |

**5b**

|   |          |          |          |
|---|----------|----------|----------|
| C | -0.25637 | -1.52380 | 0.27693  |
| C | 0.09766  | -0.24511 | -0.47712 |
| C | -0.19610 | 0.98780  | 0.37499  |
| H | 1.15670  | -0.24180 | -0.75737 |
| H | 0.29151  | -1.52411 | 1.22970  |
| H | 0.53085  | 1.00348  | 1.20122  |
| H | -0.48016 | -0.20093 | -1.41191 |
| C | -1.53628 | 0.91739  | 1.09483  |
| C | -0.06838 | 2.29451  | -0.40543 |
| H | -0.22967 | 3.15708  | 0.24223  |
| H | 0.93022  | 2.36390  | -0.84528 |
| H | -0.80249 | 2.33083  | -1.21625 |
| C | 0.11670  | -2.77394 | -0.51765 |
| H | 1.16334  | -2.72159 | -0.83032 |
| H | -0.01193 | -3.68651 | 0.07046  |
| H | -0.50009 | -2.85974 | -1.41997 |
| O | -2.11141 | -0.27815 | 1.30259  |
| O | -2.07037 | 1.89777  | 1.56517  |
| C | -1.75088 | -1.47985 | 0.57624  |
| H | -2.29174 | -1.43397 | -0.38186 |
| C | -2.31283 | -2.65277 | 1.38364  |
| H | -2.16315 | -3.54265 | 0.75908  |
| C | -3.81822 | -2.48568 | 1.60545  |
| H | -4.23663 | -3.38963 | 2.05715  |
| H | -4.01987 | -1.64338 | 2.27286  |
| H | -4.34110 | -2.30334 | 0.66072  |
| C | -1.58130 | -2.85226 | 2.71227  |

|   |          |          |         |
|---|----------|----------|---------|
| H | -1.61383 | -1.93384 | 3.30795 |
| H | -2.06239 | -3.64620 | 3.29073 |
| H | -0.53362 | -3.13363 | 2.56936 |

**5c**

|   |          |          |          |
|---|----------|----------|----------|
| C | -0.32772 | -1.75657 | -0.11431 |
| C | 0.05242  | -0.32914 | -0.49455 |
| C | -0.43673 | 0.64560  | 0.57483  |
| H | 1.13965  | -0.25222 | -0.60175 |
| H | 0.24586  | -2.01030 | 0.78712  |
| H | -0.07738 | 0.29126  | 1.55296  |
| H | -0.38712 | -0.06144 | -1.46561 |
| C | -1.95061 | 0.57925  | 0.62566  |
| C | 0.03795  | 2.07887  | 0.35964  |
| H | -0.34253 | 2.74112  | 1.13867  |
| H | 1.13056  | 2.11073  | 0.37063  |
| H | -0.30933 | 2.45713  | -0.60664 |
| C | 0.05377  | -2.74200 | -1.22069 |
| H | 1.13040  | -2.70298 | -1.41132 |
| H | -0.20583 | -3.77116 | -0.95912 |
| H | -0.46589 | -2.48794 | -2.15104 |
| O | -2.53015 | -0.59261 | 0.32143  |
| O | -2.66219 | 1.52688  | 0.87707  |
| C | -1.83286 | -1.86170 | 0.21920  |
| H | -2.34047 | -2.34205 | -0.62531 |
| C | -2.16749 | -2.65706 | 1.49112  |
| H | -3.26351 | -2.68626 | 1.53611  |
| C | -1.66762 | -1.97740 | 2.76720  |
| H | -2.05488 | -0.95832 | 2.86307  |
| H | -2.00578 | -2.53936 | 3.64261  |
| H | -0.57316 | -1.94060 | 2.80675  |
| C | -1.65668 | -4.09570 | 1.39648  |
| H | -2.00624 | -4.67300 | 2.25693  |
| H | -2.01462 | -4.59308 | 0.48908  |
| H | -0.56143 | -4.13138 | 1.39836  |

**5d**

|   |          |          |          |
|---|----------|----------|----------|
| C | -0.38089 | -1.53213 | -0.34939 |
| C | 0.20913  | -0.12872 | -0.48257 |
| C | -0.66018 | 0.85850  | 0.30220  |
| C | -2.17719 | 0.58093  | 0.13585  |
| H | 1.21683  | -0.14924 | -0.05531 |
| H | 0.21047  | -2.23468 | -0.95052 |
| H | -0.40659 | 0.82669  | 1.36665  |
| H | -0.44453 | 1.87664  | -0.03998 |
| H | -2.55114 | 0.15611  | 1.07794  |
| C | 0.32829  | 0.28035  | -1.95457 |
| H | 0.87561  | 1.22321  | -2.03775 |
| H | 0.86130  | -0.47929 | -2.53450 |
| H | -0.65217 | 0.42574  | -2.42106 |
| C | -1.06956 | -3.51053 | 1.03564  |
| H | -0.40209 | -4.18529 | 0.48655  |
| H | -1.18399 | -3.90287 | 2.05012  |
| H | -2.04642 | -3.52624 | 0.54679  |
| C | -2.97445 | 1.84989  | -0.15527 |
| H | -4.04638 | 1.64987  | -0.18210 |
| H | -2.77170 | 2.59385  | 0.61996  |
| H | -2.67961 | 2.27174  | -1.12130 |
| C | -2.50998 | -0.50453 | -0.88049 |
| O | -1.67789 | -1.55419 | -0.99390 |
| O | -3.52076 | -0.49708 | -1.54831 |

|           |          |          |          |           |          |          |          |
|-----------|----------|----------|----------|-----------|----------|----------|----------|
| C         | -0.48147 | -2.09806 | 1.07261  | H         | 1.88732  | -2.43063 | 0.89882  |
| H         | -1.15389 | -1.45946 | 1.66027  | H         | 1.41864  | -1.12944 | 2.00952  |
| C         | 0.89178  | -2.10584 | 1.74906  | H         | 1.29248  | -2.81604 | 2.52060  |
| H         | 1.62608  | -2.63030 | 1.12563  | C         | -1.26679 | -1.76092 | 2.23044  |
| H         | 1.26707  | -1.09733 | 1.94308  | H         | -2.29878 | -1.79257 | 1.86917  |
| H         | 0.83459  | -2.62975 | 2.70724  | H         | -1.20052 | -2.44786 | 3.07943  |
| <b>5e</b> |          |          |          | H         | -1.05595 | -0.75781 | 2.61123  |
| C         | -0.61926 | -1.56422 | -0.08172 | C         | -0.27250 | -2.20514 | 1.15372  |
| C         | 0.07423  | -0.21610 | -0.26660 | H         | -0.50437 | -3.25663 | 0.93908  |
| C         | -0.63943 | 0.84582  | 0.56771  | <b>5g</b> |          |          |          |
| C         | -2.15452 | 0.88896  | 0.28342  | C         | -0.39992 | -1.88265 | -0.86558 |
| H         | 1.09646  | -0.33332 | 0.11225  | C         | 0.61789  | -0.80080 | -0.41856 |
| H         | -0.19004 | -2.26682 | -0.80452 | C         | 0.05190  | 0.13166  | 0.65645  |
| H         | -0.45854 | 0.64784  | 1.62853  | H         | 1.51510  | -1.29447 | -0.02935 |
| H         | -0.20823 | 1.83147  | 0.36121  | H         | -0.74512 | -1.62819 | -1.87754 |
| H         | -2.69406 | 1.01286  | 1.23053  | H         | 0.62286  | 1.06560  | 0.66860  |
| C         | 0.15154  | 0.15030  | -1.75197 | H         | 0.93348  | -0.22459 | -1.29417 |
| H         | 0.60930  | 1.13515  | -1.88314 | C         | -1.69408 | -1.89951 | -0.06109 |
| H         | 0.75260  | -0.58255 | -2.29854 | O         | -2.32844 | -2.91006 | 0.14870  |
| H         | -0.83846 | 0.17422  | -2.21877 | O         | -2.19195 | -0.73098 | 0.37915  |
| C         | -0.43147 | -3.73048 | 1.18685  | C         | 0.21676  | -3.27846 | -0.91711 |
| H         | 0.44038  | -4.02960 | 0.59726  | H         | -0.48708 | -4.01158 | -1.31341 |
| H         | -0.35857 | -4.20703 | 2.16880  | H         | 1.10618  | -3.26085 | -1.55291 |
| H         | -1.32855 | -4.11625 | 0.68936  | H         | 0.51795  | -3.59878 | 0.08531  |
| C         | -2.55450 | 2.07392  | -0.61018 | C         | 0.14733  | -0.49906 | 2.04983  |
| H         | -3.63173 | 2.08254  | -0.78221 | H         | 1.19582  | -0.61103 | 2.33900  |
| H         | -2.26731 | 3.00741  | -0.11940 | H         | -0.35218 | 0.12150  | 2.80008  |
| H         | -2.04555 | 2.03022  | -1.57733 | H         | -0.31209 | -1.49304 | 2.08307  |
| C         | -2.75461 | -0.39203 | -0.29850 | C         | -1.39542 | 0.47684  | 0.30862  |
| O         | -2.00292 | -1.48666 | -0.49471 | H         | -1.82059 | 1.10515  | 1.10173  |
| O         | -3.92619 | -0.44833 | -0.60603 | C         | -1.62460 | 1.18875  | -1.03034 |
| C         | -0.51894 | -2.20669 | 1.32254  | H         | -1.29727 | 0.52614  | -1.84231 |
| H         | 0.41776  | -1.84370 | 1.76723  | C         | -3.11441 | 1.48349  | -1.21978 |
| C         | -1.67611 | -1.85138 | 2.26284  | H         | -3.46558 | 2.17623  | -0.44574 |
| H         | -1.50054 | -2.30594 | 3.24189  | H         | -3.29069 | 1.94967  | -2.19334 |
| H         | -1.79465 | -0.77707 | 2.42126  | H         | -3.71472 | 0.57280  | -1.15874 |
| H         | -2.62057 | -2.24685 | 1.87600  | C         | -0.80817 | 2.48178  | -1.10160 |
| <b>5f</b> |          |          |          | H         | -1.01608 | 3.11772  | -0.23247 |
| C         | -0.39057 | -1.50506 | -0.21551 | H         | 0.26847  | 2.29419  | -1.13734 |
| C         | 0.17694  | -0.09691 | -0.38983 | H         | -1.07775 | 3.04625  | -1.99857 |
| C         | -0.61942 | 0.91119  | 0.43573  | <b>5h</b> |          |          |          |
| C         | -2.14654 | 0.75114  | 0.25169  | C         | -0.05326 | -2.61723 | -0.74482 |
| H         | 1.21288  | -0.11563 | -0.03493 | C         | 0.90764  | -1.42162 | -0.74781 |
| H         | 0.11922  | -2.15503 | -0.93616 | C         | 0.25214  | -0.10246 | -0.29366 |
| H         | -0.35623 | 0.81763  | 1.49220  | H         | 1.77144  | -1.65049 | -0.11364 |
| H         | -0.33070 | 1.92519  | 0.13774  | H         | 0.42650  | -3.46021 | -1.24971 |
| H         | -2.60634 | 0.61913  | 1.24018  | H         | 0.65762  | 0.70342  | -0.91497 |
| C         | 0.19121  | 0.28879  | -1.87396 | H         | 1.28916  | -1.30493 | -1.76754 |
| H         | 0.65595  | 1.26998  | -2.00514 | C         | -1.25442 | -2.27930 | -1.60242 |
| H         | 0.75421  | -0.43977 | -2.46495 | O         | -1.79447 | -3.06356 | -2.35116 |
| H         | -0.81993 | 0.34144  | -2.29253 | O         | -1.70543 | -1.01479 | -1.54793 |
| C         | -2.78672 | 1.98714  | -0.38977 | C         | -0.48719 | -3.10012 | 0.64841  |
| H         | -3.86727 | 1.87071  | -0.47807 | H         | -1.09780 | -4.00235 | 0.56121  |
| H         | -2.57196 | 2.86613  | 0.22351  | H         | 0.39971  | -3.33969 | 1.24192  |
| H         | -2.37220 | 2.16034  | -1.38833 | H         | -1.06674 | -2.35393 | 1.19671  |
| C         | -2.59775 | -0.50079 | -0.50092 | C         | 0.57394  | 0.23202  | 1.16672  |
| O         | -1.76692 | -1.54358 | -0.65560 | H         | 1.64910  | 0.38712  | 1.29160  |
| O         | -3.72300 | -0.60467 | -0.94067 | H         | 0.06366  | 1.14396  | 1.49275  |
| C         | 1.16613  | -2.14029 | 1.67033  | H         | 0.27154  | -0.58138 | 1.83439  |

|   |          |          |          |
|---|----------|----------|----------|
| C | -1.27546 | -0.12751 | -0.48898 |
| H | -1.74290 | -0.49412 | 0.43528  |
| C | -1.88319 | 1.24173  | -0.81328 |
| H | -1.44202 | 1.94324  | -0.09216 |
| C | -3.39942 | 1.22501  | -0.60871 |
| H | -3.66002 | 0.94903  | 0.41806  |
| H | -3.82747 | 2.21032  | -0.81494 |
| H | -3.86610 | 0.50361  | -1.28699 |
| C | -1.53849 | 1.71119  | -2.22912 |
| H | -0.46129 | 1.71551  | -2.41939 |
| H | -2.01183 | 1.06071  | -2.96987 |
| H | -1.90779 | 2.72902  | -2.38318 |

### 5i

|   |          |          |          |
|---|----------|----------|----------|
| C | -0.11945 | -2.72077 | -0.69849 |
| C | 0.85906  | -1.55445 | -0.87458 |
| C | 0.32352  | -0.21613 | -0.33427 |
| H | 1.80933  | -1.79753 | -0.38632 |
| H | 0.27254  | -3.59720 | -1.22183 |
| H | 0.74463  | 0.58018  | -0.95792 |
| H | 1.07031  | -1.45772 | -1.94525 |
| C | -1.40815 | -2.37380 | -1.40622 |
| O | -2.07456 | -3.16690 | -2.03479 |
| O | -1.80318 | -1.09221 | -1.35334 |
| C | -0.41093 | -3.13164 | 0.75369  |
| H | -1.00681 | -4.04753 | 0.76909  |
| H | 0.52806  | -3.32007 | 1.28192  |
| H | -0.96277 | -2.36535 | 1.30410  |
| C | 0.79014  | 0.03623  | 1.10591  |
| H | 1.88211  | 0.09355  | 1.13754  |
| H | 0.39387  | 0.97283  | 1.50534  |
| H | 0.47846  | -0.77073 | 1.77498  |
| C | -1.21738 | -0.13463 | -0.43392 |
| H | -1.64859 | -0.35358 | 0.55320  |
| C | -1.77175 | 1.21711  | -0.90702 |
| H | -2.86307 | 1.10411  | -0.88388 |
| C | -1.39285 | 2.35473  | 0.04154  |
| H | -0.31684 | 2.55894  | 0.00902  |
| H | -1.90951 | 3.27114  | -0.25709 |
| H | -1.67077 | 2.13326  | 1.07720  |
| C | -1.36637 | 1.54602  | -2.34565 |
| H | -1.88549 | 2.45005  | -2.67747 |
| H | -0.29129 | 1.73897  | -2.42783 |
| H | -1.62656 | 0.73356  | -3.02820 |

### 5j

|   |          |          |          |
|---|----------|----------|----------|
| C | 0.20861  | 0.46338  | -0.24158 |
| C | -1.25730 | 0.08596  | -0.04898 |
| C | -1.41071 | -1.43522 | -0.10524 |
| H | 0.73523  | 0.12744  | 0.66205  |
| H | -1.61171 | 0.46443  | 0.91554  |
| H | -1.88214 | 0.54633  | -0.82637 |
| H | -0.66856 | -1.88082 | 0.57468  |
| C | 3.18096  | -0.14772 | -0.56558 |
| H | 2.87883  | 0.39605  | 0.33375  |
| H | 4.08158  | -0.71811 | -0.32250 |
| H | 3.44885  | 0.58721  | -1.33432 |
| C | 0.39422  | 1.97402  | -0.37781 |
| H | 1.45009  | 2.23976  | -0.48742 |
| H | -0.14073 | 2.34516  | -1.25873 |
| H | 0.00290  | 2.49269  | 0.50246  |

|   |          |          |          |
|---|----------|----------|----------|
| C | -2.80064 | -1.92973 | 0.27822  |
| H | -2.86830 | -3.01578 | 0.19752  |
| H | -3.02613 | -1.63688 | 1.30688  |
| H | -3.55782 | -1.49333 | -0.38003 |
| C | -1.04493 | -1.87594 | -1.50846 |
| O | -1.59617 | -2.77003 | -2.11085 |
| O | -0.09558 | -1.16378 | -2.13832 |
| C | 2.08960  | -1.08708 | -1.08687 |
| H | 1.81700  | -1.79070 | -0.28502 |
| C | 0.82933  | -0.28884 | -1.44577 |
| H | 1.09306  | 0.43363  | -2.22815 |
| C | 2.60744  | -1.88104 | -2.28692 |
| H | 3.51523  | -2.42754 | -2.01503 |
| H | 1.86696  | -2.59656 | -2.64935 |
| H | 2.85681  | -1.20298 | -3.11193 |

### 5k

|   |          |          |          |
|---|----------|----------|----------|
| C | 0.85121  | -0.64260 | -1.03717 |
| C | 0.24842  | 0.03544  | 0.19106  |
| C | -1.26987 | 0.02171  | 0.02353  |
| C | -1.80555 | -1.40540 | -0.04109 |
| H | 0.50270  | -0.56344 | 1.07714  |
| H | -1.75020 | 0.54560  | 0.85705  |
| H | -1.54032 | 0.56635  | -0.89305 |
| H | -1.67788 | -1.85621 | 0.95484  |
| H | 0.56183  | -0.06524 | -1.92820 |
| C | 3.15378  | 0.35628  | -1.56152 |
| H | 3.18040  | 1.15959  | -0.82183 |
| H | 4.18855  | 0.06704  | -1.76710 |
| H | 2.72944  | 0.75936  | -2.48677 |
| C | 0.76315  | 1.46127  | 0.38818  |
| H | 1.79988  | 1.48237  | 0.72955  |
| H | 0.69639  | 2.03681  | -0.54235 |
| H | 0.15635  | 1.97097  | 1.14216  |
| C | -3.28458 | -1.47158 | -0.41651 |
| H | -3.64964 | -2.49927 | -0.39918 |
| H | -3.87030 | -0.87626 | 0.28919  |
| H | -3.44433 | -1.06675 | -1.42064 |
| C | -0.97782 | -2.30831 | -0.94241 |
| O | -1.39395 | -3.36664 | -1.36054 |
| O | 0.29284  | -1.97426 | -1.21961 |
| C | 2.37068  | -0.86704 | -1.07493 |
| H | 2.50255  | -1.64796 | -1.83401 |
| C | 2.91799  | -1.40350 | 0.24790  |
| H | 2.34786  | -2.27317 | 0.58922  |
| H | 3.96130  | -1.70928 | 0.12812  |
| H | 2.88481  | -0.63925 | 1.03250  |

### LACTONE 6

#### 6a

|   |          |          |          |
|---|----------|----------|----------|
| C | -0.23909 | -0.23272 | -0.45636 |
| C | -2.39867 | 1.06895  | 0.10458  |
| H | 0.37282  | -0.49552 | 0.41582  |
| H | -2.53568 | 0.50225  | 1.03573  |
| C | 0.68008  | -0.17146 | -1.67651 |
| H | 1.40620  | 0.63648  | -1.54262 |
| H | 1.23710  | -1.10076 | -1.82263 |
| H | 0.10922  | 0.04259  | -2.58620 |
| C | -3.04049 | 2.44092  | 0.25618  |
| H | -4.10796 | 2.35545  | 0.46853  |
| H | -2.56199 | 2.98652  | 1.07382  |

|   |          |          |          |
|---|----------|----------|----------|
| H | -2.92522 | 3.02196  | -0.66326 |
| C | -3.05342 | 0.27043  | -1.00543 |
| O | -2.44151 | -0.88423 | -1.32907 |
| O | -4.03377 | 0.61448  | -1.62595 |
| C | -1.33306 | -1.31243 | -0.50702 |
| H | -1.72011 | -1.42302 | 0.51451  |
| C | -0.91555 | -2.71060 | -0.98597 |
| H | 0.11543  | -2.85758 | -0.63579 |
| C | -0.89416 | 1.14912  | -0.21258 |
| H | -0.38625 | 1.68326  | 0.59581  |
| H | -0.78174 | 1.76700  | -1.11280 |
| C | -0.95432 | -2.88130 | -2.50875 |
| H | -0.38473 | -2.11853 | -3.04120 |
| H | -0.54369 | -3.85971 | -2.77501 |
| H | -1.98699 | -2.83697 | -2.86476 |
| C | -1.80309 | -3.77443 | -0.33150 |
| H | -1.52579 | -4.77559 | -0.67426 |
| H | -1.71871 | -3.75257 | 0.75938  |
| H | -2.85245 | -3.60578 | -0.59807 |

**6b**

|   |          |          |          |
|---|----------|----------|----------|
| C | -0.17647 | -0.21082 | -0.68348 |
| C | -0.82568 | 1.13349  | -0.25815 |
| C | -2.29110 | 1.00517  | 0.19665  |
| H | 0.57703  | -0.48908 | 0.06289  |
| H | -0.24753 | 1.60908  | 0.53948  |
| H | -0.80974 | 1.82575  | -1.10940 |
| H | -2.32904 | 0.39315  | 1.10795  |
| C | 0.52010  | -0.04761 | -2.03611 |
| H | 1.14160  | 0.85297  | -2.01967 |
| H | 1.16951  | -0.89237 | -2.27319 |
| H | -0.21372 | 0.06416  | -2.84194 |
| C | -2.93705 | 2.35481  | 0.47660  |
| H | -3.97394 | 2.23645  | 0.79727  |
| H | -2.38381 | 2.87543  | 1.26286  |
| H | -2.93111 | 2.97736  | -0.42261 |
| C | -3.03796 | 0.24471  | -0.88014 |
| O | -2.44366 | -0.88488 | -1.30823 |
| O | -4.07946 | 0.59478  | -1.38722 |
| C | -1.24382 | -1.31573 | -0.62737 |
| H | -1.50422 | -1.45475 | 0.43077  |
| C | -0.91540 | -2.71574 | -1.16191 |
| H | -1.75563 | -3.33574 | -0.82176 |
| C | -0.86468 | -2.85290 | -2.68757 |
| H | 0.06028  | -2.45805 | -3.11269 |
| H | -0.91874 | -3.91356 | -2.95130 |
| H | -1.70851 | -2.34362 | -3.15940 |
| C | 0.35478  | -3.25414 | -0.50035 |
| H | 0.30365  | -3.18114 | 0.59138  |
| H | 0.49693  | -4.30658 | -0.76103 |
| H | 1.24193  | -2.70663 | -0.83602 |

**6c**

|   |          |          |          |
|---|----------|----------|----------|
| C | -1.81991 | -1.98203 | -0.10129 |
| C | -0.28553 | -1.96778 | -0.19526 |
| C | 0.22877  | -0.56590 | 0.22904  |
| C | -0.87799 | 0.38534  | 0.72008  |
| H | 0.99355  | -0.65153 | 1.00652  |
| H | 0.06251  | -2.70629 | 0.53673  |
| H | -2.07537 | -1.90435 | 0.96439  |
| H | -1.31801 | -0.02412 | 1.63938  |

|   |          |          |          |
|---|----------|----------|----------|
| H | 0.71156  | -0.08488 | -0.63099 |
| C | -1.97033 | 0.39387  | -0.32970 |
| C | -0.36160 | 1.78998  | 0.99809  |
| H | -1.16521 | 2.44405  | 1.34217  |
| H | 0.41595  | 1.75499  | 1.76585  |
| H | 0.06477  | 2.22816  | 0.09129  |
| C | 0.28629  | -2.33804 | -1.56556 |
| H | 1.36428  | -2.14961 | -1.57349 |
| H | 0.13383  | -3.39118 | -1.80910 |
| H | -0.16776 | -1.72898 | -2.35500 |
| C | -2.60113 | -3.19250 | -0.62877 |
| C | -2.07597 | -4.48282 | 0.00390  |
| H | -2.73417 | -5.31920 | -0.24721 |
| H | -1.07373 | -4.72766 | -0.36355 |
| H | -2.02838 | -4.40720 | 1.09557  |
| O | -2.37061 | -0.81815 | -0.75754 |
| O | -2.46234 | 1.38626  | -0.81703 |
| C | -2.70403 | -3.30751 | -2.15354 |
| H | -1.78284 | -3.67713 | -2.60837 |
| H | -3.49933 | -4.01635 | -2.40357 |
| H | -2.95334 | -2.34546 | -2.60772 |
| H | -3.62305 | -3.03316 | -0.25947 |

**6d**

|   |          |          |          |
|---|----------|----------|----------|
| C | 0.21997  | 0.07216  | -0.00448 |
| C | -1.30445 | 0.03256  | -0.05630 |
| C | -1.81400 | -1.40406 | 0.03889  |
| H | 0.53819  | -0.44727 | 0.91072  |
| H | -1.72708 | 0.61814  | 0.76762  |
| H | -1.66646 | 0.49454  | -0.98472 |
| H | -1.62234 | -1.75891 | 1.06299  |
| C | 0.75526  | 1.50089  | 0.05469  |
| H | 1.84857  | 1.52093  | 0.09363  |
| H | 0.42976  | 2.08845  | -0.80997 |
| H | 0.37771  | 1.99608  | 0.95373  |
| C | -3.30960 | -1.52317 | -0.24501 |
| H | -3.65750 | -2.54750 | -0.10673 |
| H | -3.86562 | -0.86610 | 0.42932  |
| H | -3.52894 | -1.22174 | -1.27422 |
| C | -1.02163 | -2.38071 | -0.81761 |
| O | -1.45407 | -3.46973 | -1.12664 |
| O | 0.24040  | -2.08000 | -1.16639 |
| C | 0.78367  | -0.73616 | -1.17789 |
| H | 1.85330  | -0.91199 | -1.01660 |
| C | 0.60559  | -0.08684 | -2.57429 |
| H | -0.21785 | 0.63757  | -2.52218 |
| C | 1.88142  | 0.66803  | -2.96591 |
| H | 1.73029  | 1.21087  | -3.90346 |
| H | 2.19321  | 1.38928  | -2.20662 |
| H | 2.70402  | -0.04075 | -3.11553 |
| C | 0.26119  | -1.10590 | -3.66373 |
| H | 1.02978  | -1.88263 | -3.72879 |
| H | -0.69631 | -1.60099 | -3.48296 |
| H | 0.20394  | -0.59803 | -4.63111 |

**6e**

|   |          |          |          |
|---|----------|----------|----------|
| C | 0.21252  | -0.11529 | -0.01261 |
| C | -1.29236 | -0.01488 | 0.21802  |
| C | -1.93072 | -1.40215 | 0.22742  |
| H | 0.61517  | -0.72459 | 0.80941  |
| H | -1.48275 | 0.47014  | 1.18223  |

|   |          |          |          |
|---|----------|----------|----------|
| H | -1.77151 | 0.60731  | -0.54473 |
| H | -1.54491 | -1.94182 | 1.10602  |
| C | 0.90306  | 1.24667  | 0.03852  |
| H | 1.97686  | 1.16004  | -0.15599 |
| H | 0.47829  | 1.93786  | -0.69637 |
| H | 0.77466  | 1.69129  | 1.02923  |
| C | -3.45350 | -1.35201 | 0.31134  |
| H | -3.87997 | -2.35375 | 0.37631  |
| H | -3.75457 | -0.78057 | 1.19360  |
| H | -3.86912 | -0.86049 | -0.57405 |
| C | -1.48108 | -2.26060 | -0.94360 |
| O | -2.14972 | -3.17187 | -1.38107 |
| O | -0.25619 | -2.07272 | -1.46126 |
| C | 0.55018  | -0.87910 | -1.29998 |
| H | 1.56726  | -1.27322 | -1.18950 |
| C | 0.52470  | -0.11423 | -2.63434 |
| H | 1.24777  | 0.70418  | -2.52535 |
| C | 1.02148  | -1.02884 | -3.75928 |
| H | 0.30324  | -1.83168 | -3.94877 |
| H | 1.14844  | -0.45715 | -4.68295 |
| H | 1.98335  | -1.48675 | -3.50676 |
| C | -0.83711 | 0.48032  | -3.00391 |
| H | -1.62971 | -0.27495 | -2.93570 |
| H | -1.11088 | 1.32957  | -2.37348 |
| H | -0.81625 | 0.83476  | -4.03873 |

#### 6f

|   |          |          |          |
|---|----------|----------|----------|
| C | 0.24145  | -0.01743 | 0.02698  |
| C | -1.27690 | -0.01237 | 0.17836  |
| C | -1.83655 | -1.43239 | 0.14369  |
| H | 0.63860  | -0.62633 | 0.85251  |
| H | -1.54507 | 0.44910  | 1.13572  |
| H | -1.74759 | 0.59462  | -0.60162 |
| H | -1.51375 | -1.94036 | 1.06552  |
| C | 0.82908  | 1.38552  | 0.16834  |
| H | 1.90989  | 1.39493  | -0.00209 |
| H | 0.36374  | 2.08475  | -0.53267 |
| H | 0.64302  | 1.75790  | 1.17968  |
| C | -3.36114 | -1.46394 | 0.07690  |
| H | -3.73862 | -2.48616 | 0.11936  |
| H | -3.77752 | -0.89687 | 0.91399  |
| H | -3.71298 | -1.00750 | -0.85393 |
| C | -1.22716 | -2.29069 | -0.95361 |
| O | -1.78151 | -3.27619 | -1.39053 |
| O | 0.01448  | -2.02035 | -1.38774 |
| C | 0.69040  | -0.74016 | -1.24983 |
| H | 1.73904  | -1.02806 | -1.11301 |
| C | 0.60535  | -0.06541 | -2.63393 |
| H | 0.79837  | -0.90191 | -3.31785 |
| C | 1.71553  | 0.96235  | -2.88170 |
| H | 1.78147  | 1.17222  | -3.95333 |
| H | 1.52758  | 1.91101  | -2.37413 |
| H | 2.69097  | 0.58710  | -2.55519 |
| C | -0.76542 | 0.50628  | -2.99945 |
| H | -1.57354 | -0.21034 | -2.81473 |
| H | -0.98087 | 1.42541  | -2.44491 |
| H | -0.78672 | 0.75391  | -4.06494 |

#### 6g

|   |          |          |          |
|---|----------|----------|----------|
| C | -0.41555 | -1.99063 | -0.86987 |
| C | 0.63801  | -1.16244 | -0.10819 |

|   |          |          |          |
|---|----------|----------|----------|
| C | 0.03669  | 0.01964  | 0.69645  |
| C | -1.47824 | 0.08305  | 0.45449  |
| H | 1.16066  | -1.84095 | 0.57700  |
| H | -0.82494 | -1.37274 | -1.68064 |
| H | 0.45307  | 0.95648  | 0.31095  |
| H | -1.66320 | 0.31630  | -0.60505 |
| H | 1.38399  | -0.80861 | -0.82560 |
| C | -1.56575 | -2.28000 | 0.07133  |
| O | -2.04032 | -3.37394 | 0.27875  |
| O | -2.05734 | -1.21373 | 0.72874  |
| C | 0.16169  | -3.26902 | -1.46050 |
| H | -0.59864 | -3.82820 | -2.00929 |
| H | 0.98023  | -3.02619 | -2.14353 |
| H | 0.55043  | -3.91581 | -0.66892 |
| C | 0.38498  | -0.10254 | 2.18214  |
| H | 1.46675  | -0.20880 | 2.30343  |
| H | 0.06809  | 0.77231  | 2.75604  |
| H | -0.09133 | -0.98809 | 2.61736  |
| C | -2.25923 | 1.09179  | 1.29438  |
| H | -2.16599 | 0.79322  | 2.34628  |
| C | -1.68474 | 2.49941  | 1.11669  |
| H | -2.30153 | 3.22542  | 1.65348  |
| H | -0.66192 | 2.58665  | 1.49336  |
| H | -1.68219 | 2.78376  | 0.05740  |
| C | -3.74167 | 1.06939  | 0.91428  |
| H | -4.30424 | 1.76888  | 1.53935  |
| H | -3.87257 | 1.37336  | -0.13138 |
| H | -4.17155 | 0.07332  | 1.03883  |

#### 6h

|   |          |          |          |
|---|----------|----------|----------|
| C | -0.39183 | -2.05667 | -0.89619 |
| C | 0.60826  | -1.15985 | -0.14362 |
| C | -0.05531 | 0.04448  | 0.56897  |
| C | -1.58448 | -0.09005 | 0.47793  |
| H | 1.11445  | -1.78742 | 0.60113  |
| H | -0.86898 | -1.46763 | -1.69134 |
| H | 0.17850  | 0.96082  | 0.01240  |
| H | -1.85833 | 0.08242  | -0.57132 |
| H | 1.38029  | -0.82241 | -0.84136 |
| C | -1.48040 | -2.44544 | 0.08459  |
| O | -1.86725 | -3.57465 | 0.28410  |
| O | -2.00304 | -1.43424 | 0.80321  |
| C | 0.26724  | -3.28327 | -1.51112 |
| H | -0.46526 | -3.90618 | -2.02802 |
| H | 1.03324  | -2.97381 | -2.22715 |
| H | 0.74154  | -3.89308 | -0.73686 |
| C | 0.50697  | 0.19513  | 1.98283  |
| H | 1.59799  | 0.26644  | 1.93297  |
| H | 0.13561  | 1.09380  | 2.48252  |
| H | 0.25892  | -0.67645 | 2.59777  |
| C | -3.76913 | 1.14014  | 0.64690  |
| H | -4.38347 | 1.81498  | 1.25015  |
| H | -3.63665 | 1.59194  | -0.34103 |
| H | -4.32104 | 0.20155  | 0.52402  |
| C | -2.42318 | 0.87452  | 1.32923  |
| H | -1.86119 | 1.81796  | 1.36371  |
| C | -2.66548 | 0.38616  | 2.76180  |
| H | -1.74634 | 0.12339  | 3.28702  |
| H | -3.17066 | 1.17104  | 3.33238  |
| H | -3.30974 | -0.49698 | 2.75312  |



**6i**

|   |          |          |          |
|---|----------|----------|----------|
| C | 1.35943  | -2.08283 | -1.15232 |
| C | 2.86852  | -1.94756 | -0.93581 |
| C | 3.36639  | -0.50157 | -1.12438 |
| H | 4.11928  | -0.28330 | -0.35670 |
| H | 3.10149  | -2.28560 | 0.07981  |
| H | 3.41275  | -2.60719 | -1.62050 |
| C | 4.03463  | -0.27130 | -2.48758 |
| H | 4.37938  | 0.75959  | -2.58123 |
| H | 4.89233  | -0.94156 | -2.58741 |
| H | 3.34205  | -0.48304 | -3.30739 |
| C | 2.30808  | 0.57515  | -0.89798 |
| O | 1.08995  | 0.24907  | -0.44320 |
| O | 2.54148  | 1.74622  | -1.10887 |
| C | 0.69193  | -1.11585 | -0.17640 |
| H | 1.07036  | -1.35966 | 0.82662  |
| C | -1.51764 | -0.21963 | -1.14943 |
| H | -1.17464 | -0.40073 | -2.16944 |
| H | -2.59982 | -0.37813 | -1.12239 |
| H | -1.32027 | 0.82933  | -0.91266 |
| C | -1.32010 | -0.74823 | 1.28829  |
| H | -2.41273 | -0.75279 | 1.34433  |
| H | -0.93745 | -1.44145 | 2.04377  |
| H | -0.97387 | 0.26014  | 1.54156  |
| C | -0.84519 | -1.13106 | -0.11704 |
| H | -1.14458 | -2.17039 | -0.31265 |
| H | 1.06252  | -3.08972 | -0.83266 |
| C | 0.94760  | -1.89951 | -2.61493 |
| H | 1.57482  | -2.52331 | -3.25900 |
| H | -0.09248 | -2.19558 | -2.77354 |
| H | 1.05402  | -0.86076 | -2.94659 |

**LACTONE 6'**

|            |             |             |   |
|------------|-------------|-------------|---|
| C          | -0.41782514 | -1.98983188 | - |
| 0.87957499 |             |             |   |
| C          | 0.63573486  | -1.16164188 | - |
| 0.11789499 |             |             |   |
| C          | 0.03441486  | 0.02043812  |   |
| 0.68674501 |             |             |   |
| C          | -1.48051514 | 0.08384812  |   |
| 0.44478501 |             |             |   |
| H          | 1.15838486  | -1.84015188 |   |
| 0.56729501 |             |             |   |
| H          | -0.82721514 | -1.37194188 | - |
| 1.69034499 |             |             |   |
| H          | 0.45079486  | 0.95727812  |   |
| 0.30124501 |             |             |   |
| H          | -1.66547514 | 0.31709812  | - |
| 0.61475499 |             |             |   |
| H          | 1.38171486  | -0.80781188 | - |
| 0.83530499 |             |             |   |
| C          | -1.56802514 | -2.27920188 |   |
| 0.06162501 |             |             |   |
| O          | -2.04259514 | -3.37314188 |   |
| 0.26904501 |             |             |   |
| O          | -2.05961514 | -1.21293188 |   |
| 0.71903501 |             |             |   |
| C          | -2.26150514 | 1.09258812  |   |
| 1.28467501 |             |             |   |
| H          | -2.16826514 | 0.79401812  |   |
| 2.33657501 |             |             |   |

|            |             |             |   |
|------------|-------------|-------------|---|
| C          | -1.68701514 | 2.50020812  |   |
| 1.10698501 |             |             |   |
| H          | -2.30380514 | 3.22621812  |   |
| 1.64377501 |             |             |   |
| H          | -0.66419514 | 2.58744812  |   |
| 1.48365501 |             |             |   |
| H          | -1.68446514 | 2.78455812  |   |
| 0.04769501 |             |             |   |
| C          | -3.74394514 | 1.07018812  |   |
| 0.90457501 |             |             |   |
| H          | -4.30651514 | 1.76967812  |   |
| 1.52964501 |             |             |   |
| H          | -3.87484514 | 1.37415812  | - |
| 0.14108499 |             |             |   |
| H          | -4.17382514 | 0.07411812  |   |
| 1.02912501 |             |             |   |
| H          | 0.28240489  | -0.06655669 |   |
| 1.74458850 |             |             |   |
| H          | -0.00441357 | -2.90539770 | - |
| 1.30257629 |             |             |   |

conf-1.log Energy: -433853.5721436

|   |          |          |          |
|---|----------|----------|----------|
| C | 0.69239  | 2.36726  | 0.68544  |
| C | 1.21084  | 1.79685  | -0.63470 |
| C | -1.41732 | 1.12919  | 0.47034  |
| C | -0.82741 | 2.52096  | 0.66756  |
| H | 1.16979  | 3.33646  | 0.86249  |
| H | 0.98365  | 1.71118  | 1.51812  |
| H | 1.04575  | 2.55654  | -1.41410 |
| H | -1.10839 | 0.49823  | 1.31647  |
| H | -1.10164 | 3.14318  | -0.19510 |
| C | 0.40229  | 0.61235  | -1.13161 |
| O | 0.80703  | -0.18966 | -1.93516 |
| O | -0.89036 | 0.50105  | -0.72767 |
| C | -2.94450 | 1.07656  | 0.34107  |
| H | -3.36154 | 1.51797  | 1.24939  |
| C | 2.69879  | 1.45542  | -0.59391 |
| H | 3.04946  | 1.10528  | -1.56553 |
| H | 3.27007  | 2.34336  | -0.31152 |
| H | 2.89323  | 0.67266  | 0.14535  |
| C | -1.34528 | 3.17235  | 1.94901  |
| H | -2.40758 | 3.42134  | 1.88499  |
| H | -1.19893 | 2.51003  | 2.80970  |
| H | -0.79858 | 4.09910  | 2.14143  |
| C | -3.47382 | 1.84027  | -0.88285 |
| H | -3.26142 | 2.90780  | -0.78861 |
| H | -3.01473 | 1.47535  | -1.80541 |
| H | -4.55657 | 1.71917  | -0.96016 |
| C | -3.50635 | -0.34452 | 0.32587  |
| O | -4.48943 | -0.65346 | 0.95867  |
| O | -2.90897 | -1.24598 | -0.46343 |
| H | -2.11097 | -0.87227 | -0.88193 |

**LACTONE 1**

**1a**

|   |          |         |          |
|---|----------|---------|----------|
| C | 0.28254  | 2.62318 | 0.11896  |
| C | 0.96009  | 1.78066 | -0.95942 |
| C | -1.17744 | 0.75697 | 0.76304  |
| C | -1.17734 | 2.21608 | 0.31316  |
| H | 0.34550  | 3.67832 | -0.16588 |
| H | 0.81978  | 2.51799 | 1.07256  |

|   |          |          |          |
|---|----------|----------|----------|
| H | 0.51650  | 2.06056  | -1.92733 |
| H | -0.62204 | 0.67118  | 1.70672  |
| H | -1.68734 | 2.27668  | -0.66010 |
| C | 0.63931  | 0.30043  | -0.85609 |
| O | 1.28637  | -0.55957 | -1.40095 |
| O | -0.49313 | -0.08106 | -0.20893 |
| C | -2.54075 | 0.06272  | 0.96185  |
| H | -2.32240 | -1.01021 | 0.88840  |
| C | 2.46905  | 2.00464  | -1.03416 |
| H | 2.91121  | 1.43608  | -1.85319 |
| H | 2.67396  | 3.06676  | -1.19094 |
| H | 2.94991  | 1.69668  | -0.10084 |
| C | -1.88810 | 3.14162  | 1.30045  |
| H | -2.97068 | 3.00181  | 1.27949  |
| H | -1.53168 | 2.97898  | 2.32395  |
| H | -1.68317 | 4.18223  | 1.03480  |
| C | -3.19182 | 0.31738  | 2.31844  |
| H | -2.48335 | 0.08905  | 3.11894  |
| H | -3.53311 | 1.34532  | 2.43148  |
| H | -4.06052 | -0.33379 | 2.43456  |
| C | -3.47117 | 0.40491  | -0.19346 |
| O | -4.50764 | 1.01200  | -0.07870 |
| O | -3.06049 | 0.00059  | -1.40924 |
| H | -2.19744 | -0.44302 | -1.35039 |

### 1b

|   |          |          |          |
|---|----------|----------|----------|
| C | 0.27257  | 2.57750  | 0.13904  |
| C | 0.48236  | 1.61933  | -1.03016 |
| C | -1.33329 | 0.89959  | 1.13008  |
| C | -1.11151 | 2.37771  | 0.74980  |
| H | 0.37193  | 3.61141  | -0.20671 |
| H | 1.05179  | 2.41445  | 0.89646  |
| H | -0.36514 | 1.73099  | -1.72495 |
| H | -1.15920 | 0.77738  | 2.20461  |
| H | -1.85025 | 2.65607  | -0.01468 |
| C | 0.40535  | 0.19933  | -0.51928 |
| O | 1.02165  | -0.73351 | -0.97615 |
| O | -0.41181 | -0.04767 | 0.53248  |
| C | -2.75136 | 0.36045  | 0.83041  |
| H | -2.75954 | -0.68126 | 1.17337  |
| C | 1.78392  | 1.85409  | -1.78984 |
| H | 1.89520  | 1.14205  | -2.60874 |
| H | 1.79167  | 2.86733  | -2.19894 |
| H | 2.64334  | 1.74370  | -1.12167 |
| C | -1.29693 | 3.28541  | 1.96863  |
| H | -2.27867 | 3.16763  | 2.43190  |
| H | -0.53593 | 3.06309  | 2.72450  |
| H | -1.18733 | 4.33289  | 1.67444  |
| C | -3.84540 | 1.13939  | 1.55267  |
| H | -3.64500 | 1.16851  | 2.62690  |
| H | -3.91836 | 2.16037  | 1.17224  |
| H | -4.81217 | 0.65702  | 1.39540  |
| C | -2.99876 | 0.35863  | -0.67434 |
| O | -3.68650 | 1.16870  | -1.24724 |
| O | -2.37726 | -0.60128 | -1.38364 |
| H | -1.83567 | -1.16739 | -0.81130 |

### 1c

|   |          |         |          |
|---|----------|---------|----------|
| C | 0.44736  | 2.90501 | -0.17979 |
| C | 1.24905  | 1.63553 | -0.49719 |
| C | -1.38030 | 1.20942 | 0.32092  |

|   |          |          |          |
|---|----------|----------|----------|
| C | -0.87227 | 2.63978  | 0.57294  |
| H | 0.22828  | 3.40632  | -1.12791 |
| H | 1.07510  | 3.58981  | 0.40023  |
| H | 2.06654  | 1.89298  | -1.17604 |
| H | -0.99129 | 0.54812  | 1.10617  |
| H | -1.62127 | 3.33877  | 0.18629  |
| C | 0.37618  | 0.68462  | -1.28287 |
| O | 0.74729  | -0.01002 | -2.19571 |
| O | -0.93931 | 0.65748  | -0.94367 |
| C | -2.91229 | 1.10534  | 0.30847  |
| H | -3.28195 | 1.62469  | 1.19714  |
| C | 1.86537  | 0.92915  | 0.72191  |
| H | 2.48840  | 0.09241  | 0.39713  |
| H | 2.49435  | 1.63683  | 1.26866  |
| H | 1.11630  | 0.54051  | 1.41568  |
| C | -0.74646 | 2.87853  | 2.08117  |
| H | -1.67532 | 2.63817  | 2.60791  |
| H | 0.05456  | 2.27029  | 2.51281  |
| H | -0.51451 | 3.92860  | 2.27608  |
| C | -3.55309 | 1.72095  | -0.94601 |
| H | -3.27911 | 2.77357  | -1.04531 |
| H | -3.23543 | 1.19973  | -1.85169 |
| H | -4.64104 | 1.66051  | -0.87208 |
| C | -3.39253 | -0.33403 | 0.45496  |
| O | -4.26357 | -0.66398 | 1.22457  |
| O | -2.82859 | -1.24675 | -0.35082 |
| H | -2.12953 | -0.84924 | -0.90107 |

### 1d

|   |          |          |          |
|---|----------|----------|----------|
| C | 0.57739  | 2.12361  | 0.90231  |
| C | 1.41840  | 2.06361  | -0.36997 |
| C | -1.15080 | 0.68725  | -0.09884 |
| C | -0.91289 | 2.03186  | 0.58400  |
| H | 0.79852  | 3.05560  | 1.43313  |
| H | 0.85443  | 1.29984  | 1.57571  |
| H | 1.25452  | 2.99997  | -0.92478 |
| H | -0.89171 | -0.12802 | 0.59028  |
| H | -1.16791 | 2.82195  | -0.13868 |
| C | 0.94943  | 0.99642  | -1.34641 |
| O | 1.63835  | 0.59518  | -2.25591 |
| O | -0.31633 | 0.53938  | -1.26735 |
| C | -2.58757 | 0.45880  | -0.58738 |
| H | -2.94711 | 1.38085  | -1.06296 |
| C | 2.91330  | 1.92210  | -0.08981 |
| H | 3.49076  | 1.94222  | -1.01486 |
| H | 3.24553  | 2.74228  | 0.55214  |
| H | 3.11988  | 0.97908  | 0.42532  |
| C | -1.75804 | 2.21870  | 1.84398  |
| H | -2.82739 | 2.29368  | 1.62655  |
| H | -1.60966 | 1.39027  | 2.54379  |
| H | -1.46503 | 3.14611  | 2.34355  |
| C | -2.69237 | -0.70353 | -1.59216 |
| H | -2.14740 | -0.46235 | -2.50388 |
| H | -2.26519 | -1.61175 | -1.15824 |
| H | -3.73788 | -0.89760 | -1.84596 |
| C | -3.48240 | 0.09255  | 0.58743  |
| O | -3.15027 | -0.65855 | 1.47102  |
| O | -4.73160 | 0.59399  | 0.57832  |
| H | -4.87588 | 1.18277  | -0.17546 |

### 1e

|   |          |          |          |
|---|----------|----------|----------|
| C | -0.26552 | 2.63554  | -0.88751 |
| C | 1.00582  | 1.77765  | -0.91099 |
| C | -1.10895 | 0.80930  | 0.67988  |
| C | -1.21939 | 2.29644  | 0.27350  |
| H | -0.78379 | 2.48992  | -1.84126 |
| H | 0.01172  | 3.69367  | -0.83778 |
| H | 1.56328  | 1.99384  | -1.82623 |
| H | -0.47693 | 0.71357  | 1.57123  |
| H | -2.24401 | 2.47510  | -0.07733 |
| C | 0.59638  | 0.33131  | -1.02890 |
| O | 1.14593  | -0.49882 | -1.70964 |
| O | -0.51310 | -0.03867 | -0.33757 |
| C | -2.45547 | 0.13393  | 1.00186  |
| H | -2.23285 | -0.93122 | 1.14795  |
| C | 1.96212  | 1.96648  | 0.27795  |
| H | 2.88618  | 1.40977  | 0.10519  |
| H | 2.21057  | 3.02594  | 0.38448  |
| H | 1.53608  | 1.62162  | 1.22340  |
| C | -0.98069 | 3.21020  | 1.48320  |
| H | -1.62423 | 2.95311  | 2.32736  |
| H | 0.05712  | 3.15600  | 1.82317  |
| H | -1.18923 | 4.24717  | 1.20681  |
| C | -3.10455 | 0.68893  | 2.26579  |
| H | -2.39479 | 0.67323  | 3.09715  |
| H | -3.45764 | 1.71111  | 2.11371  |
| H | -3.96972 | 0.08162  | 2.53616  |
| C | -3.42956 | 0.22369  | -0.17512 |
| O | -4.52907 | 0.71644  | -0.09528 |
| O | -3.01477 | -0.29349 | -1.34139 |
| H | -2.09654 | -0.60728 | -1.27101 |

**LACTONE 6''**

**6''-a**

|   |          |          |          |
|---|----------|----------|----------|
| C | -0.15917 | -0.94716 | 2.68721  |
| C | 0.41472  | 0.45274  | 2.47747  |
| C | -1.18380 | -0.90155 | 0.38230  |
| C | -1.44048 | -1.11976 | 1.87801  |
| H | -0.37582 | -1.08823 | 3.75142  |
| H | 0.58667  | -1.70671 | 2.42128  |
| H | -0.31516 | 1.17803  | 2.86808  |
| H | -2.13082 | -0.62899 | -0.09629 |
| H | -2.12525 | -0.31658 | 2.18349  |
| C | 0.53491  | 0.79663  | 1.00633  |
| O | 1.33678  | 1.58618  | 0.56569  |
| O | -0.31379 | 0.22449  | 0.11657  |
| C | -0.63760 | -2.10157 | -0.42132 |
| H | -1.30957 | -2.94515 | -0.25043 |
| C | -0.61202 | -1.78915 | -1.92481 |
| H | -1.63201 | -1.61356 | -2.27583 |
| H | -0.02767 | -0.89343 | -2.15195 |
| H | -0.19721 | -2.62833 | -2.48793 |
| C | 0.72519  | -2.56345 | 0.06822  |
| O | 0.91959  | -3.61695 | 0.62564  |
| O | 1.75898  | -1.72526 | -0.13990 |
| H | 1.48152  | -0.92641 | -0.61645 |
| C | -2.12789 | -2.45693 | 2.15297  |
| H | -3.00999 | -2.59553 | 1.51942  |
| H | -1.44386 | -3.29460 | 1.98520  |
| H | -2.45506 | -2.49247 | 3.19522  |
| C | 1.75107  | 0.66247  | 3.18487  |

|   |         |          |         |
|---|---------|----------|---------|
| H | 2.11041 | 1.68418  | 3.05648 |
| H | 1.63493 | 0.45930  | 4.25253 |
| H | 2.50590 | -0.02056 | 2.78350 |

**6''-b**

|   |          |          |          |
|---|----------|----------|----------|
| C | -0.61020 | -0.21944 | 2.99557  |
| C | -0.31544 | 1.12099  | 2.29459  |
| C | -0.72178 | -0.90096 | 0.57684  |
| C | -0.93745 | -1.37818 | 2.02007  |
| H | -1.42609 | -0.07166 | 3.70827  |
| H | 0.27623  | -0.48380 | 3.58533  |
| H | -1.21243 | 1.44189  | 1.74750  |
| H | -1.51510 | -0.18625 | 0.32616  |
| H | -2.00655 | -1.61180 | 2.08684  |
| C | 0.76445  | 0.86675  | 1.26742  |
| O | 1.79164  | 1.48283  | 1.14062  |
| O | 0.53676  | -0.19815 | 0.45172  |
| C | -0.75374 | -1.97000 | -0.52030 |
| H | -1.65310 | -2.57062 | -0.35420 |
| C | -0.83233 | -1.32117 | -1.91403 |
| H | -1.73510 | -0.70941 | -1.98716 |
| H | 0.03382  | -0.68008 | -2.09871 |
| H | -0.87152 | -2.08682 | -2.69191 |
| C | 0.40049  | -2.97083 | -0.53929 |
| O | 0.22560  | -4.15216 | -0.72717 |
| O | 1.64516  | -2.48761 | -0.43504 |
| H | 1.63469  | -1.53310 | -0.23851 |
| C | -0.14597 | -2.63315 | 2.39149  |
| H | -0.45503 | -3.50645 | 1.81130  |
| H | 0.92940  | -2.47927 | 2.24797  |
| H | -0.30731 | -2.86566 | 3.44786  |
| C | 0.09663  | 2.21564  | 3.26909  |
| H | 0.30720  | 3.15022  | 2.74574  |
| H | -0.70623 | 2.38998  | 3.98972  |
| H | 0.99740  | 1.92317  | 3.81581  |

**6''-c**

|   |          |          |          |
|---|----------|----------|----------|
| C | -1.36700 | 0.33835  | 2.40359  |
| C | -0.16689 | 1.19248  | 1.93878  |
| C | -0.42481 | -1.13031 | 0.60460  |
| C | -1.41534 | -1.07745 | 1.77337  |
| H | -2.28020 | 0.89516  | 2.17724  |
| H | -1.31590 | 0.24632  | 3.49424  |
| H | -0.37309 | 1.54599  | 0.91872  |
| H | -0.69500 | -0.37005 | -0.14121 |
| H | -2.41343 | -1.24212 | 1.35675  |
| C | 1.06631  | 0.32909  | 1.81973  |
| O | 2.15385  | 0.56673  | 2.28096  |
| O | 0.89528  | -0.81940 | 1.11187  |
| C | -0.30463 | -2.49048 | -0.10053 |
| H | 0.18524  | -3.18123 | 0.59929  |
| C | -1.66857 | -3.04114 | -0.50967 |
| H | -2.27276 | -3.27980 | 0.36737  |
| H | -2.21239 | -2.31789 | -1.12458 |
| H | -1.54099 | -3.94827 | -1.10063 |
| C | 0.60871  | -2.39968 | -1.32855 |
| O | 0.26520  | -2.73469 | -2.43683 |
| O | 1.85431  | -1.94684 | -1.12851 |
| H | 1.96973  | -1.63295 | -0.21445 |
| C | -1.12423 | -2.15731 | 2.81937  |
| H | -1.21263 | -3.16796 | 2.41130  |

|   |          |          |         |
|---|----------|----------|---------|
| H | -0.11511 | -2.04273 | 3.22939 |
| H | -1.83403 | -2.06998 | 3.64592 |
| C | 0.07774  | 2.39434  | 2.84038 |
| H | 0.88898  | 3.01674  | 2.45803 |
| H | -0.83011 | 3.00014  | 2.90149 |
| H | 0.34557  | 2.06762  | 3.84886 |

**6''-d**

|   |          |          |          |
|---|----------|----------|----------|
| C | -1.24388 | -0.03228 | 2.70231  |
| C | -0.10290 | 0.98554  | 2.47371  |
| C | -0.88237 | -0.93924 | 0.46189  |
| C | -1.03367 | -1.33597 | 1.92782  |
| H | -2.19786 | 0.40724  | 2.39424  |
| H | -1.32364 | -0.24361 | 3.77323  |
| H | -0.54559 | 1.96730  | 2.26023  |
| H | -1.74740 | -0.32466 | 0.17936  |
| H | -1.95258 | -1.92992 | 1.99778  |
| C | 0.75449  | 0.71757  | 1.24492  |
| O | 1.82513  | 1.24235  | 1.05750  |
| O | 0.29784  | -0.11963 | 0.27935  |
| C | -0.79500 | -2.07150 | -0.56828 |
| H | -1.64698 | -2.73266 | -0.38554 |
| C | -0.88484 | -1.51897 | -2.00163 |
| H | -1.83273 | -0.99111 | -2.13379 |
| H | -0.07087 | -0.81951 | -2.20920 |
| H | -0.83894 | -2.33161 | -2.73004 |
| C | 0.43824  | -2.96482 | -0.47330 |
| O | 0.37080  | -4.17197 | -0.48157 |
| O | 1.63510  | -2.36217 | -0.45899 |
| H | 1.53453  | -1.39522 | -0.39222 |
| C | 0.13155  | -2.16347 | 2.47944  |
| H | 0.18372  | -3.15320 | 2.01917  |
| H | 1.10059  | -1.67418 | 2.32952  |
| H | -0.00070 | -2.30825 | 3.55517  |
| C | 0.80528  | 1.14487  | 3.69889  |
| H | 1.59238  | 1.87625  | 3.51210  |
| H | 0.20705  | 1.47755  | 4.55050  |
| H | 1.27186  | 0.19048  | 3.96195  |

**6''-e**

|   |          |          |          |
|---|----------|----------|----------|
| C | -1.54842 | 0.44683  | 2.05511  |
| C | -0.21316 | 1.18772  | 2.26478  |
| C | -0.48024 | -1.12781 | 0.50909  |
| C | -1.36636 | -1.04217 | 1.74851  |
| H | -2.09694 | 0.90329  | 1.22467  |
| H | -2.16909 | 0.56909  | 2.94858  |
| H | -0.26721 | 2.16324  | 1.76599  |
| H | -0.93607 | -0.54070 | -0.30016 |
| H | -2.34747 | -1.44430 | 1.47489  |
| C | 0.99121  | 0.52565  | 1.61202  |
| O | 2.12242  | 0.91134  | 1.78058  |
| O | 0.81412  | -0.53932 | 0.79301  |
| C | -0.18940 | -2.55047 | 0.00117  |
| H | 0.46959  | -3.03023 | 0.73812  |
| C | -1.46898 | -3.36665 | -0.16412 |
| H | -1.94009 | -3.55590 | 0.80216  |
| H | -2.18388 | -2.84437 | -0.80685 |
| H | -1.24088 | -4.32438 | -0.63208 |
| C | 0.58571  | -2.52851 | -1.32210 |
| O | 0.21460  | -3.10737 | -2.31532 |
| O | 1.74132  | -1.85098 | -1.34169 |

|   |          |          |          |
|---|----------|----------|----------|
| H | 1.87366  | -1.36092 | -0.51059 |
| C | -0.80887 | -1.84044 | 2.93010  |
| H | -0.81831 | -2.91552 | 2.72975  |
| H | 0.22346  | -1.56114 | 3.16609  |
| H | -1.41588 | -1.66198 | 3.82183  |
| C | 0.10016  | 1.45278  | 3.74467  |
| H | 1.05046  | 1.97730  | 3.85321  |
| H | -0.69387 | 2.06780  | 4.17490  |
| H | 0.14989  | 0.51783  | 4.31017  |

**6''-f**

|   |          |          |          |
|---|----------|----------|----------|
| C | -0.48759 | -0.65882 | 3.06187  |
| C | -0.60374 | 0.82705  | 2.63862  |
| C | -0.09203 | -0.87848 | 0.63526  |
| C | 0.17274  | -1.55419 | 1.98745  |
| H | -1.49320 | -1.01984 | 3.29596  |
| H | 0.09461  | -0.71285 | 3.98797  |
| H | -1.54155 | 0.94125  | 2.07621  |
| H | -1.16685 | -0.67244 | 0.56951  |
| H | -0.33424 | -2.52336 | 1.97191  |
| C | 0.47264  | 1.21023  | 1.64429  |
| O | 1.16153  | 2.20152  | 1.70432  |
| O | 0.62025  | 0.37349  | 0.59376  |
| C | 0.28290  | -1.59705 | -0.66740 |
| H | -0.05314 | -0.91764 | -1.46440 |
| C | 1.77939  | -1.85847 | -0.89599 |
| H | 2.36157  | -1.02894 | -0.48992 |
| H | 2.12097  | -2.78319 | -0.42624 |
| H | 2.00827  | -1.90901 | -1.96525 |
| C | -0.58759 | -2.83570 | -0.82777 |
| O | -1.59819 | -3.03678 | -0.19845 |
| O | -0.20699 | -3.72443 | -1.76171 |
| H | 0.62056  | -3.46520 | -2.19062 |
| C | 1.65670  | -1.76786 | 2.30701  |
| H | 2.13006  | -2.48963 | 1.64088  |
| H | 2.22238  | -0.83119 | 2.25111  |
| H | 1.75129  | -2.15202 | 3.32627  |
| C | -0.62786 | 1.77417  | 3.83035  |
| H | -0.79966 | 2.80525  | 3.51541  |
| H | -1.42447 | 1.47975  | 4.51907  |
| H | 0.32463  | 1.73607  | 4.36643  |

**6''-g**

|   |          |          |          |
|---|----------|----------|----------|
| C | -0.90845 | -0.61566 | 2.87954  |
| C | -0.51360 | 0.87663  | 2.80187  |
| C | -0.22640 | -0.88480 | 0.56332  |
| C | -0.05749 | -1.49424 | 1.95657  |
| H | -1.96032 | -0.73609 | 2.60201  |
| H | -0.81259 | -0.95790 | 3.91504  |
| H | -1.42657 | 1.47922  | 2.71098  |
| H | -1.30125 | -0.77322 | 0.38130  |
| H | -0.50431 | -2.49308 | 1.92791  |
| C | 0.28924  | 1.26939  | 1.56418  |
| O | 0.85045  | 2.33791  | 1.47202  |
| O | 0.36726  | 0.42821  | 0.51597  |
| C | 0.34987  | -1.61261 | -0.65905 |
| H | 0.05540  | -0.99285 | -1.51865 |
| C | 1.87906  | -1.74929 | -0.69844 |
| H | 2.33550  | -0.84813 | -0.28384 |
| H | 2.23958  | -2.61094 | -0.13298 |
| H | 2.23971  | -1.83630 | -1.72818 |

|   |          |          |          |
|---|----------|----------|----------|
| C | -0.39071 | -2.92731 | -0.86042 |
| O | -1.44448 | -3.19623 | -0.33590 |
| O | 0.16460  | -3.80980 | -1.70909 |
| H | 1.00883  | -3.49212 | -2.05871 |
| C | 1.38948  | -1.60004 | 2.45289  |
| H | 1.94070  | -2.39384 | 1.94721  |
| H | 1.94817  | -0.66752 | 2.31509  |
| H | 1.39061  | -1.83114 | 3.52215  |
| C | 0.22999  | 1.35659  | 4.05483  |
| H | 0.48534  | 2.41410  | 3.97745  |
| H | -0.40425 | 1.20757  | 4.93218  |
| H | 1.15211  | 0.78521  | 4.20066  |

### 6"-h

|   |          |          |          |
|---|----------|----------|----------|
| C | 0.16984  | -0.61662 | 2.86599  |
| C | 0.05731  | 0.90220  | 2.75323  |
| C | -0.72641 | -0.85010 | 0.50189  |
| C | -0.84841 | -1.30585 | 1.96210  |
| H | -0.01529 | -0.90774 | 3.90586  |
| H | 1.19209  | -0.93419 | 2.63418  |
| H | -0.92129 | 1.19511  | 3.16344  |
| H | -1.67816 | -1.04395 | 0.00225  |
| H | -1.84068 | -0.96463 | 2.28879  |
| C | -0.00334 | 1.38101  | 1.31294  |
| O | 0.33850  | 2.49096  | 0.97325  |
| O | -0.54264 | 0.57690  | 0.37554  |
| C | 0.36138  | -1.48854 | -0.39116 |
| H | 0.29971  | -0.91245 | -1.32435 |
| C | 1.79664  | -1.37358 | 0.12395  |
| H | 1.99938  | -0.34736 | 0.44329  |
| H | 2.00051  | -2.03343 | 0.97249  |
| H | 2.51723  | -1.58848 | -0.67158 |
| C | -0.07523 | -2.88897 | -0.81723 |
| O | -1.21505 | -3.15481 | -1.11304 |
| O | 0.86505  | -3.84458 | -0.90487 |
| H | 1.74110  | -3.51966 | -0.65563 |
| C | -0.81397 | -2.82687 | 2.10643  |
| H | -1.57553 | -3.31047 | 1.48995  |
| H | 0.16364  | -3.23849 | 1.82972  |
| H | -0.99538 | -3.09860 | 3.14973  |
| C | 1.15307  | 1.63490  | 3.52213  |
| H | 1.01505  | 2.71561  | 3.47451  |
| H | 1.13941  | 1.32134  | 4.56935  |
| H | 2.13706  | 1.39715  | 3.10535  |

### 6"-i

|   |          |          |          |
|---|----------|----------|----------|
| C | -0.71144 | -0.52000 | 2.86547  |
| C | 0.18493  | 0.68895  | 2.57462  |
| C | -0.74125 | -1.10079 | 0.45043  |
| C | -1.61581 | -0.81544 | 1.67446  |
| H | -1.30978 | -0.30805 | 3.75759  |
| H | -0.09657 | -1.39814 | 3.10497  |
| H | -0.45063 | 1.58637  | 2.62379  |
| H | -1.38380 | -1.21677 | -0.42897 |
| H | -2.12646 | 0.12070  | 1.40656  |
| C | 0.71833  | 0.74275  | 1.15124  |
| O | 1.67164  | 1.40236  | 0.82075  |
| O | 0.02794  | 0.10270  | 0.16214  |
| C | 0.27464  | -2.26798 | 0.50328  |
| H | 1.10903  | -1.94741 | 1.14671  |
| C | -0.27841 | -3.58391 | 1.04367  |

|   |          |          |          |
|---|----------|----------|----------|
| H | -0.47031 | -3.51459 | 2.11443  |
| H | -1.20412 | -3.86656 | 0.53462  |
| H | 0.44987  | -4.37704 | 0.87485  |
| C | 0.89560  | -2.51036 | -0.88509 |
| O | 1.02238  | -3.61345 | -1.36101 |
| O | 1.32871  | -1.44368 | -1.56753 |
| H | 1.11838  | -0.61232 | -1.10168 |
| C | -2.71569 | -1.83723 | 1.96877  |
| H | -3.21321 | -2.16501 | 1.05076  |
| H | -2.34601 | -2.71992 | 2.49146  |
| H | -3.46951 | -1.36942 | 2.60756  |
| C | 1.32392  | 0.84132  | 3.58041  |
| H | 1.89221  | 1.75459  | 3.40039  |
| H | 0.91397  | 0.87380  | 4.59311  |
| H | 2.00904  | -0.00977 | 3.51516  |

### 6"-j

|   |          |          |          |
|---|----------|----------|----------|
| C | -0.25121 | -1.00063 | 2.71119  |
| C | 0.30658  | 0.42158  | 2.63118  |
| C | -1.19634 | -0.72820 | 0.39099  |
| C | -1.48508 | -1.16295 | 1.83036  |
| H | -0.51400 | -1.21897 | 3.75231  |
| H | 0.52439  | -1.72549 | 2.43735  |
| H | -0.36912 | 1.07277  | 3.20728  |
| H | -2.15593 | -0.61689 | -0.12670 |
| H | -2.24771 | -0.46060 | 2.19490  |
| C | 0.26029  | 1.04983  | 1.24564  |
| O | 0.88498  | 2.04513  | 0.96440  |
| O | -0.62138 | 0.58423  | 0.33098  |
| C | -0.37456 | -1.69367 | -0.48921 |
| H | -0.92898 | -2.63839 | -0.51467 |
| C | -0.25672 | -1.15060 | -1.92285 |
| H | -1.25409 | -0.99185 | -2.34097 |
| H | 0.27925  | -0.19989 | -1.91865 |
| H | 0.27806  | -1.85527 | -2.56478 |
| C | 1.03329  | -1.93287 | 0.02960  |
| O | 1.79384  | -1.04212 | 0.32414  |
| O | 1.45131  | -3.20906 | 0.12229  |
| H | 0.77427  | -3.83380 | -0.17155 |
| C | -2.06799 | -2.57326 | 1.90027  |
| H | -2.89804 | -2.70330 | 1.19809  |
| H | -1.30935 | -3.33248 | 1.68132  |
| H | -2.44414 | -2.77123 | 2.90724  |
| C | 1.70919  | 0.53008  | 3.22585  |
| H | 2.05264  | 1.56531  | 3.23877  |
| H | 1.70342  | 0.14699  | 4.25030  |
| H | 2.41141  | -0.06327 | 2.63349  |
